# Supplementary material
Source: PubMed Central journal article supplement (PMC3020898)

## SUPPORTING INFORMATION

### A Promising General Solution to the Problem of Ligating Peptides and Glycopeptides

Ping Wang<sup>1</sup> and Samuel J. Danishefsky<sup>\*,1,2</sup>

<sup>1</sup>Laboratory for Bioorganic Chemistry, Sloan-Kettering Institute for Cancer Research, 1275 York Avenue, New York, NY 10065, and <sup>2</sup>Department of Chemistry, Columbia University, Havemeyer Hall, 3000 Broadway, New York, NY 10027

|                                                                                           |    |
|-------------------------------------------------------------------------------------------|----|
| <b>Section 1:</b> Expanded reference.....                                                 | 3  |
| <b>Section 2:</b> Experiment and peptide characterization.....                            | 6  |
| Materials and methods.....                                                                | 6  |
| General procedure I, II, III for synthesis of thioacid.....                               | 7  |
| General procedure IV, V for HOBT-mediated and I <sub>2</sub> /HOBT-mediated ligation..... | 9  |
| Synthesis thioacid <b>7, 12, 21, 24, 26, 28, 31, 33, 17, 19, 37, 46</b> .....             | 10 |
| Peptide ligation.....                                                                     | 23 |
| Peptide <b>16</b> .....                                                                   | 23 |
| Peptide <b>9</b> .....                                                                    | 26 |
| Peptide <b>11</b> .....                                                                   | 30 |
| Peptide <b>14</b> .....                                                                   | 32 |
| Peptide <b>15</b> .....                                                                   | 35 |
| Peptide <b>47</b> .....                                                                   | 37 |
| Peptide <b>18</b> .....                                                                   | 39 |
| Peptide <b>20</b> .....                                                                   | 40 |
| Peptide <b>23</b> .....                                                                   | 41 |

|                                            |    |
|--------------------------------------------|----|
| Peptide <b>25</b> .....                    | 43 |
| Peptide <b>27</b> .....                    | 46 |
| Peptide <b>29</b> .....                    | 47 |
| Peptide <b>30</b> .....                    | 49 |
| Peptide <b>32</b> .....                    | 50 |
| Peptide <b>48</b> .....                    | 52 |
| Peptide <b>34</b> .....                    | 54 |
| Peptide <b>36</b> .....                    | 56 |
| Peptide <b>39</b> .....                    | 57 |
| Peptide <b>42</b> .....                    | 58 |
| Peptide <b>45</b> .....                    | 60 |
| <b>Section 3: Selective NMR data</b> ..... | 62 |
| <sup>1</sup> HNMR of <b>21</b> .....       | 62 |
| <sup>13</sup> CNMR of <b>21</b> .....      | 63 |
| HSQC of <b>21</b> .....                    | 64 |
| <sup>1</sup> HNMR of <b>24</b> .....       | 65 |
| <sup>13</sup> CNMR of <b>24</b> .....      | 66 |
| <sup>1</sup> HNMR of <b>26</b> .....       | 67 |
| HSQC of <b>26</b> .....                    | 68 |
| <sup>1</sup> HNMR of <b>23</b> .....       | 69 |
| <sup>13</sup> CNMR of <b>23</b> .....      | 70 |
| <sup>1</sup> HNMR of <b>42</b> .....       | 71 |
| <sup>13</sup> CNMR of <b>42</b> .....      | 72 |
| <sup>1</sup> HNMR of <b>45</b> .....       | 73 |
| <sup>13</sup> CNMR of <b>45</b> .....      | 74 |

Here we provide an expanded bibliography as to the total use of thio-intermediate in amide bond construction including simple peptide kinds:

Pawlewski, B. Acetylation of aromatic amines. *Chemische Berichte*, **35**, 110-113 (1902).

Carr, E. L.; Smith, G. E. P. & Alliger, G. Thiazolesulfenamides. *J. Org. Chem.* **14**, 921-934 (1949).

Smith, G. E. P., Jr.; Alliger, G.; Carr, E. L. & Young, K. C. Thiocarbamylsulfenamides. *J. Org. Chem.* **14**, 935-945 (1949).

Alliger, G.; Smith, G. E. P.; Carr, E. L. & Stevens, H. P. Oxidative condensation reactions of amines with carbodithioates and xanthates. *J. Org. Chem.* **14**, 962-966 (1949).

Cronyn, M. W. & Jiu, J. A new method for the preparation of thio acids and application to peptide chemistry. *J. Am. Chem. Soc.* **74**, 4726 (1952).

Hawkins, P.; Tarbell, D.S. & Noble Jr, P. Cleavage of the carbon-sulfure bond. Kinetics of the reaction of thiobenzoic acid with aniline. *J. Am. Chem. Soc.* **75**, 4462-4465 (1953).

König, H. B.; Siefken, W. & Offe, H. A. Sulfur-containing derivatives of pyridinecarboxylic acids and compounds derived therefrom. *Chemische Berichte*. **87**, 825 (1954)

Guttmann, S. T. & Boissonnas, R. A. Synthesis of benzyl N-acetyl-L-seryl-L-tyrosyl-L-seryl-L-methionyl-y-L-glutamate and related peptides. *Helv. Chim. Acta.* **41**. 1852-1867 (1958).

Saegusa, T.; Kobayashi, S.; Hirota, K.; Okumura, Y. & Ito, Y. Synthetic Reactions by Complex Catalysts. IX. Reaction of Thiol with Isocyanide. *Bulletin of the Chemical Society of Japan.* **41**, 1638-1642 (1968)

Hirabayashii, Y.; Mizuta, M.; Kojima, M.; Horio, Y. & Ishihara, H. The Kinetics of the Reaction of Thiol Acids with Anilines. *Bulletin of the Chemical Society of Japan*. **44**, 791-793 (1971).

Blake, J. Peptide Segment coupling in aqueous medium: silver ion activation of the thiolcarboxyl group. *Int. J. Peptide Protein Res.* **17**, 273-274 (1981).

Yamashiro, D. & Blake, J. Use of Thiol Acids in Peptide Segment Coupling in Non-Aqueous Solvents. *Int. J. Peptide Protein Res.* **18**, 383-392 (1981).

Mitin, Y. V. & Zapevalova, N. P. Thio- $\alpha$ -amino acids (S-acids) as a carboxyl component in peptide synthesis catalyzed by papain. *International Journal of Peptide & Protein Research*. **35**, 352-356 (1990)

Muir, T. W.; Dawson, P. E. & Kent, S. B. H. [13]. Protein Synthesis by Chemical Ligation of Unprotected Peptides in Aqueous Solution. *Methods in Enzymology*. **289**, 266-298 (1997)

Robert, J.; Anouti, M. & Paris, J. Formulation of acylsulfide ions from the reaction of sulfur with thiocarboxylate ions, and reactivity towards acyl chlorides in N,N-dimethylacetamide. *J. Chem. Soc., Perkin Trans.* **2**, 473-478 (1997).

Liu, C.F.; Rao, C. & Tam, J.P. Acyl disulfide intramolecular acylation for orthogonal coupling between unprotected peptide segments. *Tetrahedron Letters*. **37**, 933-936 (1998).

Shangguan, N.; Katukojvala, S.; Greenberg, R. & Williams, L. J. The Reaction of Thio Acids with Azides: A New Mechanism and New Synthetic Applications. *J. Am. Chem. Soc.* **125**, 7754 (2003)

Razio, F. & Wong, C-H. RuCl<sub>3</sub>-promoted amide formation from azides and thioacids. *Tetrahedron Letters*. **44**, 9083 (2003)

Leman, L.; Orgel, L. & Ghadiri, M. R. Carbonyl Sulfide–Mediated Prebiotic Formation of Peptides. *Science* **306**, 283-286 (2004).

Botti, P.; Villain, M.; Manganiello, S. & Gaertner, H. Native Chemical Ligation through in Situ O to S Acyl Shift. *Organic Letters*. **6**, 4861-4864 (2004)

Tickler, A. K. & Wade, J. D. Overview of Solid Phase Synthesis of “Difficult Peptide Sequences. *Current Protocols in Protein Science*. Supplement 50, 18.8.1-18.8.6 (2007).

Mizuno, T.; Nakai, T. & Mihara, M. Novel Synthesis of N,N'-Dialkyl Cyclic Ureas Using Sulfur-Assisted Carbonylation and Oxidation. *Heteroatom Chemistry*. **20**, 64-68 (2008)

Hirano, K.; Macmillan, D.; Tezuka, K.; Tsuji, T. & Kajihara, Y. Design and Synthesis of a Homogenous Erythropoietin Analogue with Two Human Complex-Type Sialyloligosaccharides: Combined Use of Chemical and Bacterial Protein Expression Methods. *Angew. Chem. Int. Ed.* **48**, 1-5 (2009).

Crich, D. & Sharma, I. Epimerization-free block synthesis of peptides from thioacids and amines with the Sanger and Mukaiyama reagents. *Angewandte Chemie International Edition*. **48**, 2355 (2009)

Crich, D. & Sasaki, K. Reaction of Thioacids with Isocyanates and Isothiocyanates: A Convenient Amide Ligation Process. *Organic Letters*. **11**, 2514 (2009)

Erlich, L.; Ajish Kumar, K.S.; Haj-Yahya, M.; Dawson, P.E. & Brik, A. N-Methylcysteine-mediated total chemical synthesis of ubiquitin thioester. *Org. Biomol. Chem.*, **8**, 2392-2396 (2010).

Fang, G.; Cui, H.; Zheng, J. & Liu, L. Chemoselective Ligation of Peptide Phenyl Esters with N-Terminal Cysteines. *ChemBioChem*. **11**, 1061-1065 (2010).

## Materials and methods

All commercial materials (Aldrich, Fluka, Nova) were used without further purification. All solvents were reagent grade or HPLC grade (Fisher). Anhydrous THF, diethyl ether, CH<sub>2</sub>Cl<sub>2</sub>, toluene, and benzene were obtained from a dry solvent system (passed through column of alumina) and used without further drying. All reactions were performed under an atmosphere of pre-purified dry Ar (g). NMR spectra (<sup>1</sup>H and <sup>13</sup>C) were recorded on a Bruker Advance DRX-600 MHz, referenced to TMS or residual solvent. Low-resolution mass spectral analyses were performed with a JOEL JMS-DX-303-HF mass spectrometer or Waters Micromass ZQ mass spectrometer. Analytical TLC was performed on E. Merck silica gel 60 F254 plates and flash column chromatography was performed on E. Merck silica gel 60 (40–63 mm). Yields refer to chromatographically pure compounds.

HPLC: All separations of peptides and glycopeptides involved a mobile phase of 0.05% TFA (v/v) in water (solvent A)/0.04% TFA in acetonitrile(solvent B). Preparative and analytical HPLC separations were performed using a Rainin HPXL solvent delivery system equipped with a Rainin UV-1 detector. LC-MS chromatographic separations were performed using a Waters Acquity Ultra Performance LC system equipped with acquity UPLC®BEN C18 column (1.7 μm, 2.1 x 100.0 mm) or acquity UPLC®BEN C8 column (1.7 μm, 2.1 x 100.0 mm) at a flow rate of 0.3 mL/min, Waters 2695 Separations Module and a Waters 996 Photodiode Array Detector equipped with Xbridge™ C18 column (5.0 μm, 2.1 x 150 mm), X-Terra™ MS C18 column (3.5 μm, 2.1 x 100.0 mm) or Varian Microsorb C18 column (2 x 150 mm) at a flow rate of 0.2 mL/min. HPLC separations were performed using: X-Bridge™ Prep C18 column OBDTM (5.0 μm, 19 x 150 mm) at a flow rate of 16 mL/min, Microsorb 100-5 C18 column at a flow rate of 16.0 mL/min, or Microsorb 300-5 C4 column at a flow rate of 16.0 mL/min.

## Solid-phase peptide synthesis according to Fmoc-strategy

Automated peptide synthesis was performed on an Applied Biosystems Pioneer continuous flow peptide synthesizer. Peptides were synthesized under standard automated Fmoc protocols. The deblock mixture was a mixture of 100/5/5 of DMF/piperidine/DBU. The following Fmoc amino acids from NovaBiochem were employed: Fmoc-Ala-OH,

Fmoc-Arg(Pbf)-OH, Fmoc-Asn(Trt)-OH, Fmoc-Asp(O*t*Bu)-OH, Fmoc-Cys(*t*Buthio)-OH, Fmoc-Cys(Trt)-OH, Fmoc-Glu(O*t*Bu)-OH, Fmoc-Gln(Trt)-OH, Fmoc-Gly-OH, Fmoc-His(Boc)-OH, Fmoc-Ile-OH, Fmoc-Leu-OH, Fmoc-Lys(Boc)-OH, Fmoc-Met-OH, Fmoc-Phe-OH, Fmoc-Pro-OH, Fmoc-Ser(*t*Bu)-OH, Fmoc-Thr(*t*Bu)-OH, Fmoc-Trp(Boc)-OH, Fmoc-Tyr(*t*Bu)-OH, Fmoc-Val-OH, Fmoc-Ile-Thr( $\psi^{\text{Me,Me}}$ Pro)-OH, Fmoc-Ser(*t*Bu)-Ser( $\psi^{\text{Me,Me}}$ Pro)-OH. Upon completion of automated synthesis on a 0.05 mmol scale, the peptide resin was washed into a peptide synthesis vessel with DCM. The resin cleavage was effected by treatment with AcOH/TFE/DCM (1:1:4) for 3 x 25 min to yield peptidyl acids in good yield.

General Procedure I for thioacid **7**, **12**, **17**, **19**.

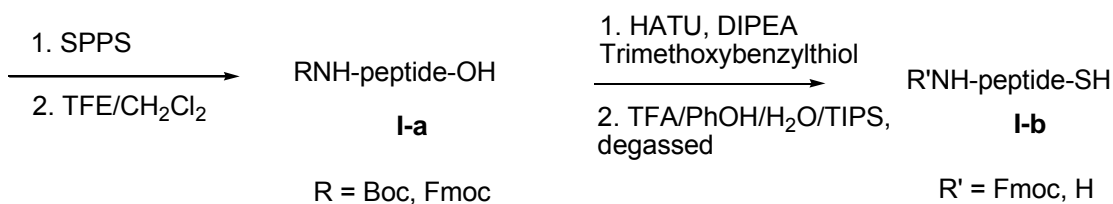

Following the general procedure for SPPS, peptides was synthesized by automated Applied Biosystems Pioneer continuous flow peptide synthesizer, employing Fmoc-Gly(or Pro)-NovaSyn® TGT resin, and other standard Fmoc, Boc amino acids.

To a solution of **I-a** (0.02 mmol), 2, 4, 6-trimethoxybenzylthiol (0.1 mmol) in anhydrous DMF (200  $\mu$ L) was added HATU (0.1 mmol) and DIPEA (0.08 mmol), and stirred overnight. The reaction was concentrated under a stream of nitrogen and the residue was passed through short silica gel column (10% MeOH/CH<sub>2</sub>Cl<sub>2</sub>) to give a white solid. Next the solid was treated with degassed cocktail TFA (30.0 mg of phenol, 0.1 ml of water, 0.07 ml of triisopropylsilane, and 1.5 ml TFA) for one hour. The solution was diluted with water (10 mL) and lyophilized immediately. The residue was triturated with diethyl ether to give a white suspension, which was centrifuged and the ether subsequently decanted. The resulting solid was purified by HPLC to give thioacid **I-b**.

General Procedure II for thioacid **21**, **24**, **26**.

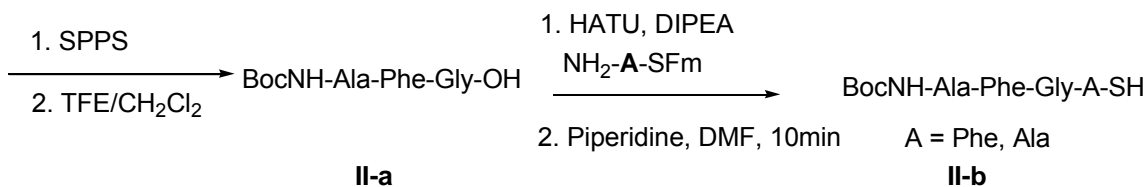

Following the general procedure for SPPS, peptide was synthesized by automated Applied Biosystems Pioneer continuous flow peptide synthesizer, employing Fmoc-Gly-NovaSyn® TGT resin, Boc-Ala-OH, Boc-Val-OH, Ac-Gly-OH and other standard Fmoc amino acids.

To a solution of **II-a** (0.02 mmol) and NH<sub>2</sub>-A-SFm (0.04 mmol) in anhydrous DMF (300 uL) was added HATU (0.04 mmol) and DIPEA (0.03 mmol) at rt. The reaction mixture was stirred at rt for 12 h. The solution was diluted with CH<sub>2</sub>Cl<sub>2</sub>. This organic phase was washed with H<sub>2</sub>O, 1N HCl solution, brine and dried over Na<sub>2</sub>SO<sub>4</sub>. The solution was filtered, concentrated.

To a solution of the residue in anhydrous DMF (200 uL) was added piperidine (20 uL) at rt. The reaction mixture was stirred at rt for 15 min. The solution was diluted with EtOAc. The organic phase was washed with H<sub>2</sub>O, 1N HCl solution, brine and dried over Na<sub>2</sub>SO<sub>4</sub>. The solution was filtered, concentrated. The resulting solid was purified by HPLC to give thioacid **II-b**.

General Procedure III for thioacid **28**, **31**, **33**.

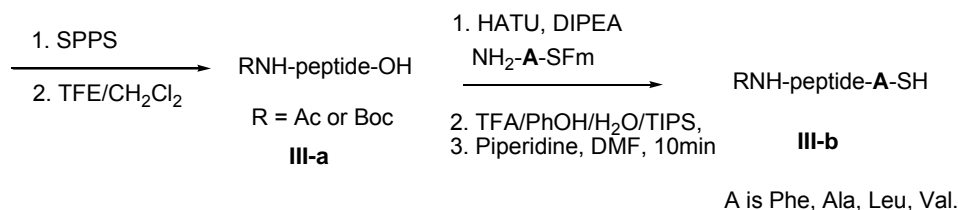

Following the general procedure for SPPS, peptide was synthesized by automated Applied Biosystems Pioneer continuous flow peptide synthesizer, employing Fmoc-Gly-NovaSyn® TGT resin, Boc-Ala-OH, Boc-Val-OH, Ac-Gly-OH and other standard Fmoc amino acids.

To a solution of **III-a** (0.02 mmol) and NH<sub>2</sub>-A-SFm (0.04 mmol) in anhydrous DMF (300 uL) was added HATU (0.04 mmol) and DIPEA (0.03 mmol) at rt. The reaction mixture was stirred at rt for 12 h. The solution was diluted with CH<sub>2</sub>Cl<sub>2</sub>. This



organic phase was washed with H<sub>2</sub>O, 1N HCl solution, brine and dried over Na<sub>2</sub>SO<sub>4</sub>. The solution was filtered, concentrated. Next the residue was treated with cocktail TFA (30.0 mg of phenol, 0.1 ml of water, 0.07 ml of triisopropylsilane, and 1.5 ml TFA) for one hour. The reaction was concentrated under a stream of nitrogen and the residue was triturated with diethyl ether to give a white suspension, which was centrifuged and the ether subsequently decanted.

To a solution of the residue in anhydrous DMF (200 uL) was added piperidine (15 uL) at rt. The reaction mixture was stirred at rt for 20min. The reaction was concentrated under a stream of nitrogen and the residue was triturated with diethyl ether to give a white suspension, which was centrifuged and the ether subsequently decanted. The resulting solid was purified by HPLC to give thioacid **III-b**.

General procedure IV for HOBT-mediated Ligation:

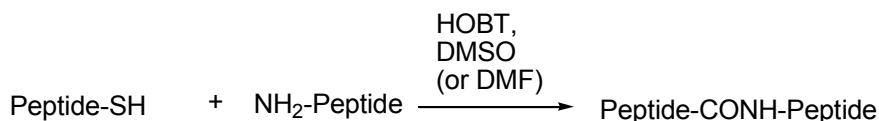

To a mixture of thioacid (1.2 eq), NH<sub>2</sub>peptide (1.0 eq) and 4Å MS (2 mg) was added 30 uL DMSO (or DMF, containing 2.0 eq HOBT). The reaction mixture was stirred at room temperature for 3-6 h. The reactions were monitored by LC-MS and purified directly by HPLC upon complete consumption of the starting material.

General procedure V for I<sub>2</sub>/HOBT-mediated Ligation:

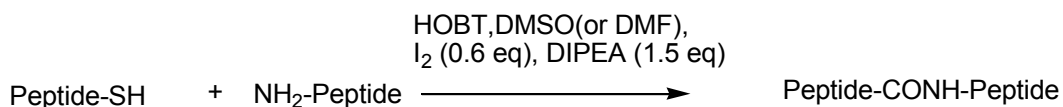

To an oven-dried vial were charged thioacid (1.2 eq), NH<sub>2</sub>peptide (1.0 eq) and 4Å MS (2 mg). A stock solution of DIPEA/HOBT (1.5 eq DIPEA, 2.0 eq HOBT in DMSO or DMF) and I<sub>2</sub> (0.6 eq in DMSO or DMF) was added to the vial. The reactions were monitored by LC-MS and purified directly by HPLC upon complete consumption of the starting material.

## Preparation of thioacid..

Fmoc-RSGDSAGSVGAPRHSWG-SH **7**

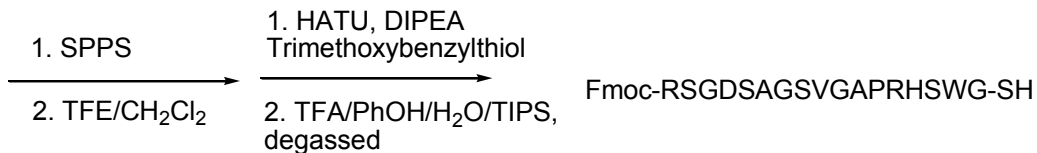

Following the general procedure for SPPS and I, peptide **7** (0.02 mmol) was synthesized by automated Applied Biosystems Pioneer continuous flow peptide synthesizer, employing Fmoc-Gly-NovaSyn® TGT resin and other standard Fmoc amino acids. According to the general procedure, thioacid **7** (13.0 mg, 33% over two steps) was obtained as a white powder after HPLC (20-45% MeCN/H<sub>2</sub>O over 30 min, Microsorb 100-5 C4 column, 16 mL/min, 265 nm) purification and lyophilization.

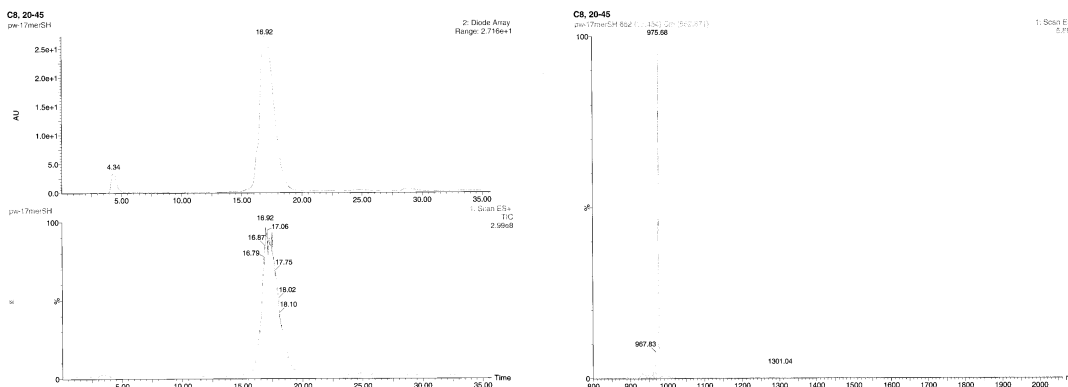

- a) UV and MS traces from LC-MS analysis of thioacid **7**: gradient 20-45% CH<sub>3</sub>CN/H<sub>2</sub>O over 30 min at a flow rate of 0.2 mL/min, C4 column. (b) ESI-MS of compound. ESI calcd for C<sub>86</sub>H<sub>121</sub>N<sub>26</sub>O<sub>25</sub>S [M+H]<sup>+</sup>  $m/z = 1949.86$ , [M+2H]<sup>2+</sup>  $m/z = 975.43$ , found: 975.68.

## Fmoc-ESHRGWITAP-SH **12**

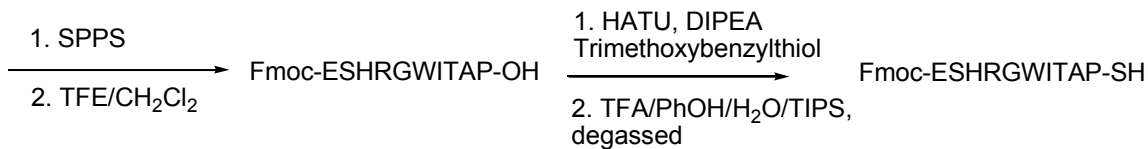

Following the general procedure for SPPS and I, peptide **12** (0.02 mmol) was synthesized by automated Applied Biosystems Pioneer continuous flow peptide synthesizer, employing Fmoc-Pro-NovaSyn® TGT resin and other standard Fmoc amino acids. According to the general procedure, thioacid **12** (9.0 mg, 32% over two steps) was obtained as a white powder after HPLC (30-50% MeCN/H<sub>2</sub>O over 30 min, Microsorb 100-5 C18 column, 16 mL/min, 265 nm) purification and lyophilization.

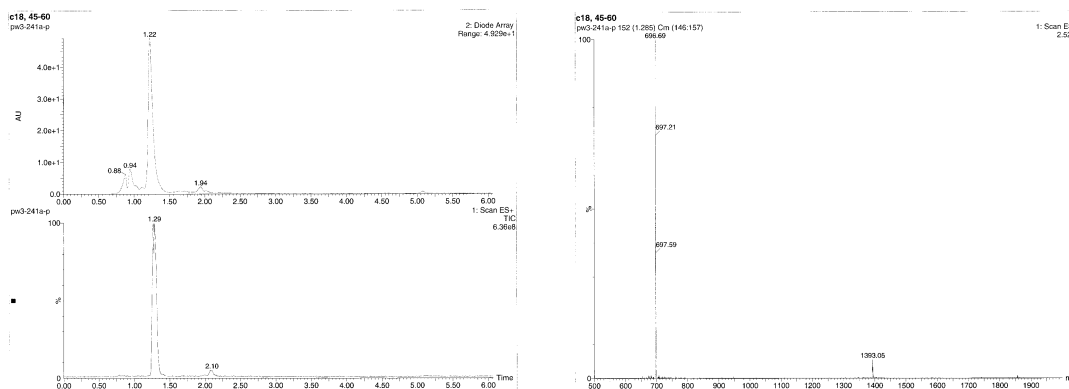

- a) UV and MS traces from UPLC-MS analysis of thioacid **12**: gradient 45-60% CH<sub>3</sub>CN/H<sub>2</sub>O over 6 min at a flow rate of 0.3 mL/min, C18 column. (b) ESI-MS of compound. ESI calcd for C<sub>66</sub>H<sub>87</sub>N<sub>16</sub>O<sub>16</sub>S [M+H]<sup>+</sup> *m/z* = 1391.61, [M+2H]<sup>2+</sup> *m/z* = 696.31, found: 1391.93, 696.69.

## Boc-Val-Phe-SH **21**

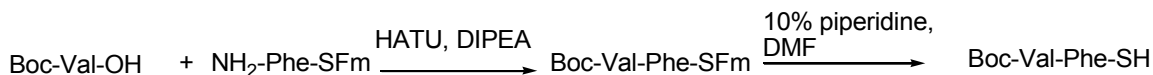

To a solution of Boc-Val-OH (10 mg, 0.046 mmol) and NH<sub>2</sub>-Ala-SFm (17 mg, 0.047 mmol) in anhydrous CH<sub>2</sub>Cl<sub>2</sub> (200 uL) was added HATU (28 mg, 0.073 mmol) and DIPEA (15 uL) at rt. The reaction mixture was stirred at rt for 12 h. The solution was diluted with CH<sub>2</sub>Cl<sub>2</sub>. This organic phase was washed with H<sub>2</sub>O, 1N HCl solution, brine and dried over Na<sub>2</sub>SO<sub>4</sub>. The solution was filtered, concentrated.

To a solution of the residue in anhydrous DMF (200 uL) was added piperidine (20 uL) at rt. The reaction mixture was stirred at rt for 15 min. The solution was diluted with EtOAc. The organic phase was washed with H<sub>2</sub>O, 1N HCl solution, brine and dried over Na<sub>2</sub>SO<sub>4</sub>. The solution was filtered, concentrated. Thioacid **21** (12 mg, 67% over two steps) was obtained as a white powder after HPLC (50-90% MeCN/H<sub>2</sub>O over 30 min, Microsorb 100-5 C18 column, 16 mL/min, 230 nm) purification and lyophilization. <sup>1</sup>H NMR (600 MHz, CDCl<sub>3</sub>): δ 7.29 (t, 2 H, *J* = 7.5 Hz), 7.27-7.23 (m, 1 H), 7.10 (d, 2 H, *J* = 7.5 Hz), 6.38 (br, s, 1 H), 4.91-4.88 (m, 1 H), 4.83 (br, s, 1 H), 4.58 (br, s, 1 H), 3.85-3.83 (dd, 1 H, *J* = 6.0, 8.4 Hz), 3.13-3.07 (m, 2 H), 2.12-2.08 (m, 1 H), 1.41 (s, 9 H), 0.88 (d, 3 H, *J* = 6.7 Hz), 0.79 (s, 3 H); <sup>13</sup>C NMR (150 MHz, CDCl<sub>3</sub>): δ 171.7, 135.2, 129.3, 128.9, 127.4, 60.5, 37.6, 30.2, 28.3, 19.3; HR-ESIMS (*m/z*) Calcd for C<sub>19</sub>H<sub>28</sub>N<sub>2</sub>O<sub>4</sub>SNa: [M+Na]<sup>+</sup> *m/z* = 403.1668; Found: 403.1655.

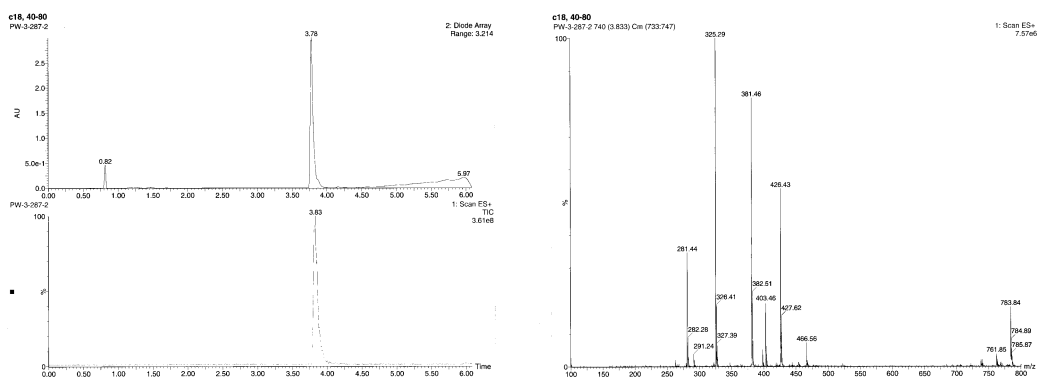

- a) UV and MS traces from UPLC-MS analysis of thioacid **21**: gradient 40-80% CH<sub>3</sub>CN/H<sub>2</sub>O over 6 min at a flow rate of 0.3 mL/min, C18 column. (b) ESI-MS of compound. ESI calcd for C<sub>19</sub>H<sub>29</sub>N<sub>2</sub>O<sub>4</sub>S [M+H]<sup>+</sup> *m/z* = 381.18, found: 381.46.

## Boc-Ala-Phe-Gly-Phe-SH **24**

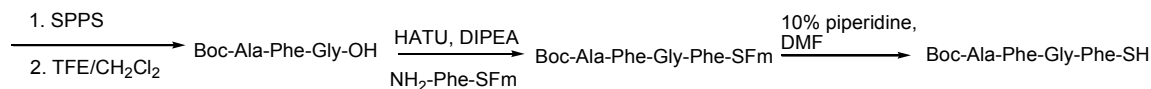

Following the general procedure for SPPS and II, peptide **24** (0.02 mmol) was synthesized by automated Applied Biosystems Pioneer continuous flow peptide synthesizer, employing Fmoc-Gly-NovaSyn® TGT resin and other standard amino acids. According to the general procedure, thioacid **24** (7.3 mg, 66% over two steps) was obtained as a white powder after HPLC (50-80% MeCN/H<sub>2</sub>O over 30 min, Microsorb 100-5 C18 column, 16 mL/min, 230 nm) purification and lyophilization. <sup>1</sup>H NMR (600 MHz, CDCl<sub>3</sub>): δ 7.25-7.23 (m, 3 H), 7.20-7.15 (m, 3 H), 7.16-7.11 (m, 3 H), 7.08 (d, 1 H, *J* = 7.1 Hz), 6.53 (d, 1 H, *J* = 8.4 Hz), 4.82 (s, 1 H), 4.74-4.71 (m, 1 H), 4.48-4.47 (m, 1 H), 4.00-3.96 (m, 1 H), 3.82-3.81 (m, 1 H), 3.57-3.54 (m, 1 H), 3.19-3.16 (m, 1 H), 3.10-3.06 (m, 2 H), 2.94 (dd, 1 H, *J* = 9.2, 14.4 Hz), 1.26 (s, 9 H), 1.20 (d, 3 H, *J* = 7.1 Hz); <sup>13</sup>C NMR (150 MHz, CDCl<sub>3</sub>): δ 199.4, 173.7, 171.3, 169.4, 156.4, 136.3, 135.9, 129.3, 129.04, 129.01, 128.5, 127.4, 126.9, 81.5, 61.4, 54.7, 51.9, 43.1, 37.1, 36.6, 28.2, 17.5; HR-ESIMS (*m/z*) Calcd for C<sub>28</sub>H<sub>36</sub>N<sub>4</sub>O<sub>6</sub>SNa: [M+Na]<sup>+</sup> *m/z* = 579.2254; Found: 579.2242.

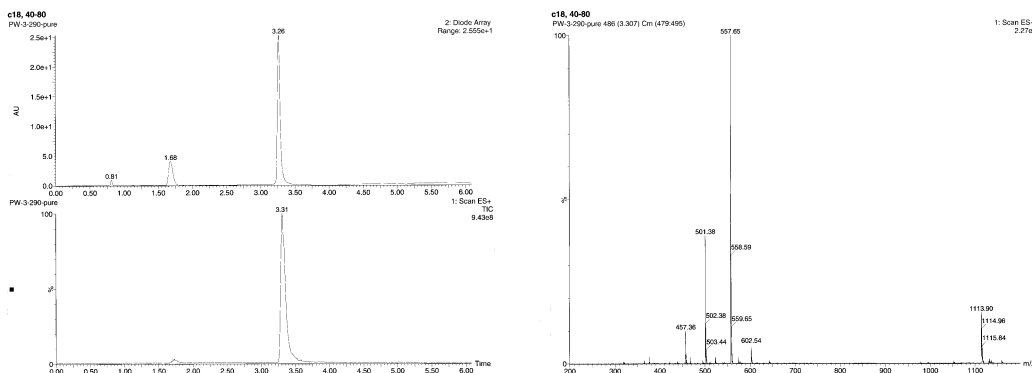

- b) UV and MS traces from UPLC-MS analysis of compound **24**: gradient 40-80% CH<sub>3</sub>CN/H<sub>2</sub>O over 6 min at a flow rate of 0.3 mL/min, C18 column. (b) ESI-MS of compound. ESI calcd for C<sub>28</sub>H<sub>37</sub>N<sub>4</sub>O<sub>6</sub>S [M+H]<sup>+</sup> *m/z* = 557.24, found: 557.65.

## Boc-Ala-Phe-Gly-Ala-SH **26**

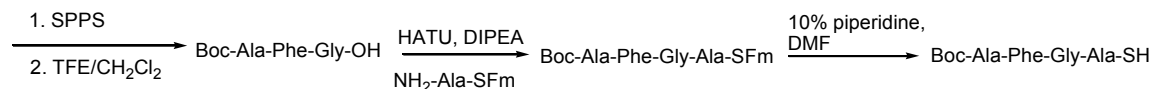

Following the general procedure for SPPS and II, peptide **26** (0.02 mmol) was synthesized by automated Applied Biosystems Pioneer continuous flow peptide synthesizer, employing Fmoc-Gly-NovaSyn® TGT resin other standard amino acids. According to the general procedure, thioacid **26** (6.8 mg, 71% over two setps) was obtained as a white powder after HPLC (35-65% MeCN/H<sub>2</sub>O over 30 min, Microsorb 100-5 C18 column, 16 mL/min, 230 nm) purification and lyophilization; <sup>1</sup>H NMR (600 MHz, CDCl<sub>3</sub>): δ 7.27-7.25 (m, 3 H), 7.24-7.22 (m, 1 H), 7.20 (br, s, 1 H), 6.48 (s, 1 H), 4.78 (s, 1 H), 4.50-4.46 (m, 2 H), 4.10-4.07 (m, 1 H), 3.85-3.84 (m, 1 H), 3.66 (d, 1 H, *J* = 5.1 Hz), 3.15-3.12 (m, 2 H), 1.37 (d, 3 H, *J* = 7.1 Hz); 1.27 (s, 9 H), 1.23 (d, 3 H, *J* = 7.2 Hz); HR-ESIMS (*m/z*) Calcd for C<sub>22</sub>H<sub>32</sub>N<sub>4</sub>O<sub>6</sub>SNa: [M+Na]<sup>+</sup> *m/z* = 503.1941; Found: 503.1926.

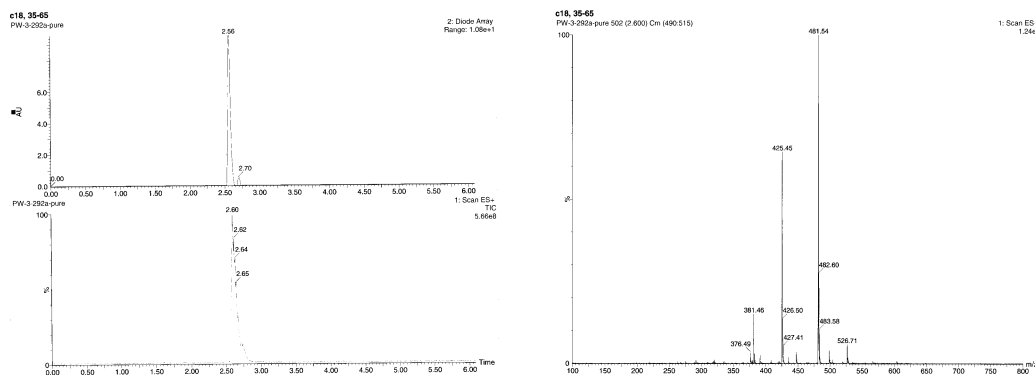

- a) UV and MS traces from UPLC-MS analysis of thioacid **26**: gradient 35-65% CH<sub>3</sub>CN/H<sub>2</sub>O over 6 min at a flow rate of 0.3 mL/min, C18 column. (b) ESI-MS of compound. ESI calcd for C<sub>22</sub>H<sub>33</sub>N<sub>4</sub>O<sub>6</sub>S [M+H]<sup>+</sup> *m/z* = 481.20, found: 481.54.

Ac-GRFSWGA-SH **28**

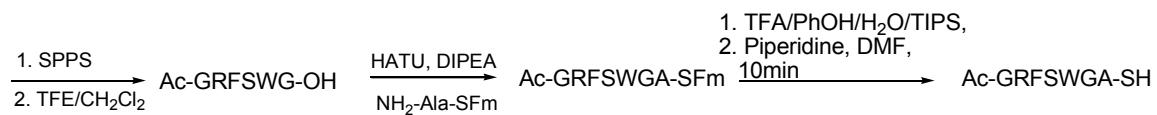

Following the general procedure for SPPS and III, peptide **28** (0.02 mmol) was synthesized by automated Applied Biosystems Pioneer continuous flow peptide synthesizer, employing Fmoc-Gly-NovaSyn® TGT resin and other standard Fmoc amino acids. According to the general procedure, thioacid **28** (8.8 mg, 53% over three steps) was obtained as a white powder after HPLC (20-40% MeCN/H<sub>2</sub>O over 30 min, Microsorb 100-5 C18 column, 16 mL/min, 230 nm) purification and lyophilization. HR-ESIMS (*m/z*) Calcd for C<sub>38</sub>H<sub>52</sub>N<sub>11</sub>O<sub>9</sub>S: [M+H]<sup>+</sup> *m/z* = 838.3672; Found: 838.3704.

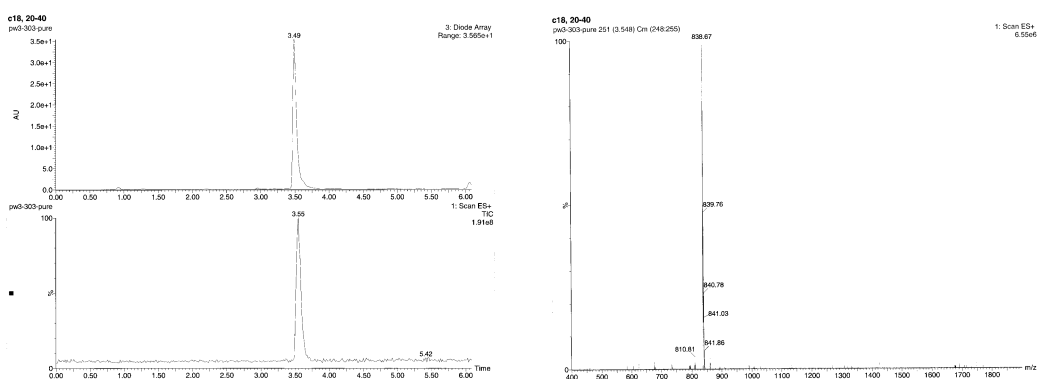

- a) UV and MS traces from UPLC-MS analysis of thioacid **28**: gradient 20-40% CH<sub>3</sub>CN/H<sub>2</sub>O over 6 min at a flow rate of 0.3 mL/min, C18 column. (b) ESI-MS of compound. ESI calcd for C<sub>38</sub>H<sub>52</sub>N<sub>11</sub>O<sub>9</sub>S [M+H]<sup>+</sup> *m/z* = 838.36, found: 838.67.

Ac-GRFSWGL-SH **31**

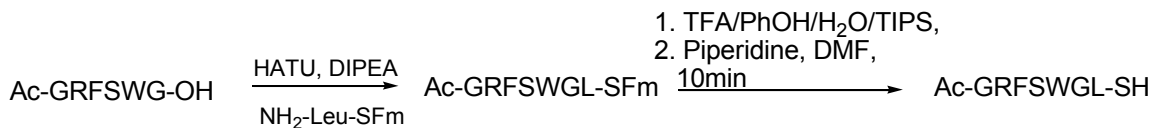

Following the general procedure for SPPS and III, peptide **31** (0.02 mmol) was synthesized by automated Applied Biosystems Pioneer continuous flow peptide synthesizer, employing Fmoc-Gly-NovaSyn® TGT resin and other standard amino acids. According to the general procedure, thioacid **31** (8.5 mg, 48% over three steps) was obtained as a white powder after HPLC (30-35% MeCN/H<sub>2</sub>O over 30 min, Microsorb 100-5 C18 column, 16 mL/min, 230 nm) purification and lyophilization. HR-ESIMS ( $m/z$ ) Calcd for C<sub>41</sub>H<sub>58</sub>N<sub>11</sub>O<sub>9</sub>S: [M+H]<sup>+</sup>  $m/z$  = 880.4141; Found: 880.4132.

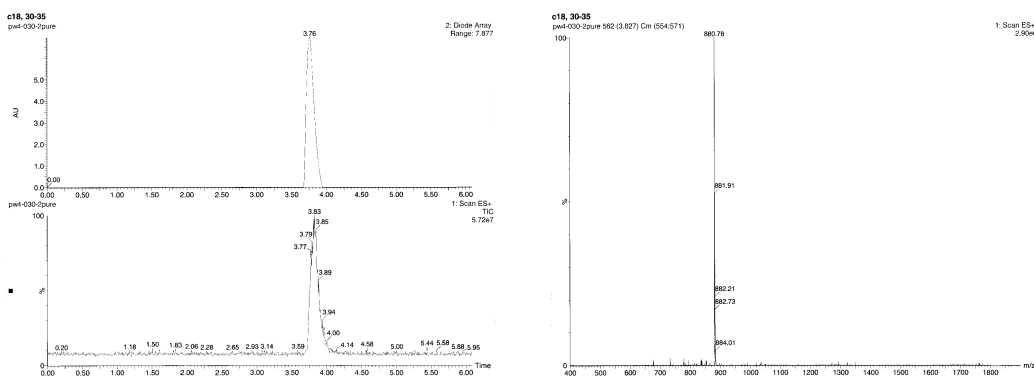

- a) UV and MS traces from UPLC-MS analysis of thioacid **31**: gradient 30-35% CH<sub>3</sub>CN/H<sub>2</sub>O over 6 min at a flow rate of 0.3 mL/min, C18 column. (b) ESI-MS of compound. ESI calcd for C<sub>41</sub>H<sub>58</sub>N<sub>11</sub>O<sub>9</sub>S [M+H]<sup>+</sup>  $m/z$  = 880.41, found: 880.78.



Ac-GRFSWGV-SH **33**

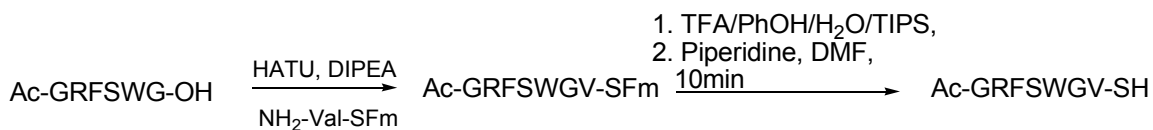

Following the general procedure for SPPS and III, peptide **33** was synthesized by automated Applied Biosystems Pioneer continuous flow peptide synthesizer, employing Fmoc-Gly-NovaSyn® TGT resin and other standard amino acids. According to the general procedure, thioacid **33** (8.8 mg, 51% over three steps) was obtained as a white powder after HPLC (35-45% MeCN/H<sub>2</sub>O over 30 min, Microsorb 100-5 C18 column, 16 mL/min, 230 nm) purification and lyophilization. HR-ESIMS (*m/z*) Calcd for C<sub>40</sub>H<sub>56</sub>N<sub>11</sub>O<sub>9</sub>S: [M+H]<sup>+</sup> *m/z* = 866.3985; Found: 866.3984.

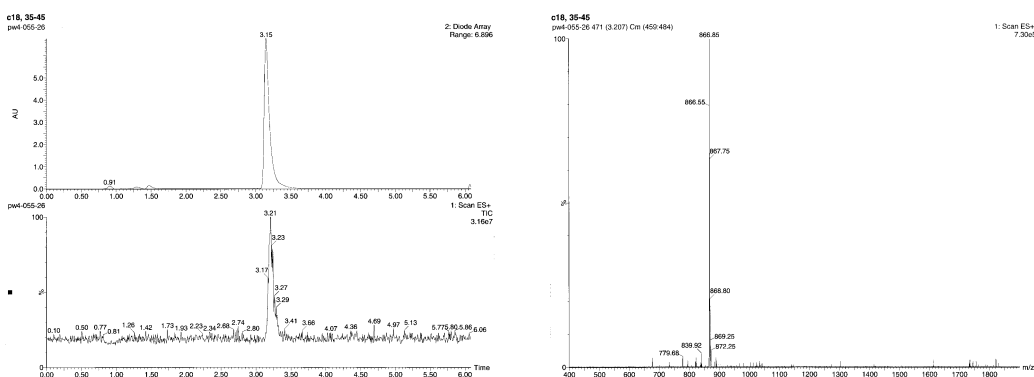

- a) UV and MS traces from UPLC-MS analysis of thioacid **33**: gradient 35-45% CH<sub>3</sub>CN/H<sub>2</sub>O over 6 min at a flow rate of 0.3 mL/min, C18 column. (b) ESI-MS of compound. ESI calcd for C<sub>40</sub>H<sub>56</sub>N<sub>11</sub>O<sub>9</sub>S [M+H]<sup>+</sup> *m/z* = 866.39, found: 866.55.

## H-GWPLILG-SH **17**

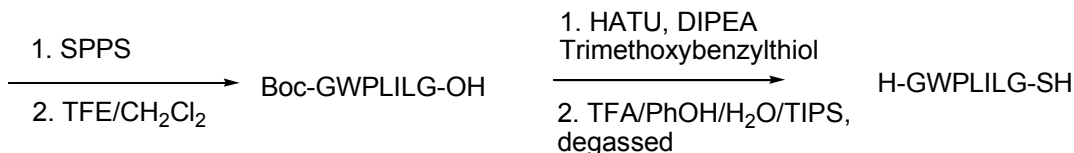

Following the general procedure for SPPS and I, peptide **17** (0.02 mmol) was synthesized by automated Applied Biosystems Pioneer continuous flow peptide synthesizer, employing Fmoc-Gly-NovaSyn® TGT resin other standard amino acids. According to the general procedure, thioacid **17** (9.0 mg, 60% over two steps) was obtained as a white powder after HPLC (25-45% MeCN/H<sub>2</sub>O over 30 min, Microsorb 100-5 C18 column, 16 mL/min, 230 nm) purification and lyophilization. HR-ESIMS ( $m/z$ ) Calcd for C<sub>36</sub>H<sub>58</sub>N<sub>7</sub>O<sub>8</sub>S: [M+H]<sup>+</sup>  $m/z$  = 748.4069; Found: 748.4037.

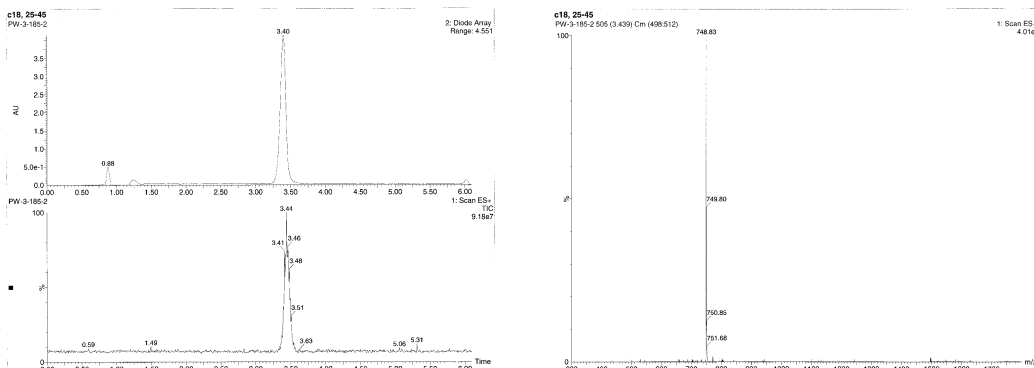

- a) UV and MS traces from UPLC-MS analysis of thioacid **17**: gradient 25-45% CH<sub>3</sub>CN/H<sub>2</sub>O over 6 min at a flow rate of 0.3 mL/min, C18 column. (b) ESI-MS of compound. ESI calcd for C<sub>36</sub>H<sub>58</sub>N<sub>7</sub>O<sub>8</sub>S [M+H]<sup>+</sup>  $m/z$  = 748.40, found: 748.83.

H-FGPELWP-SH **19**

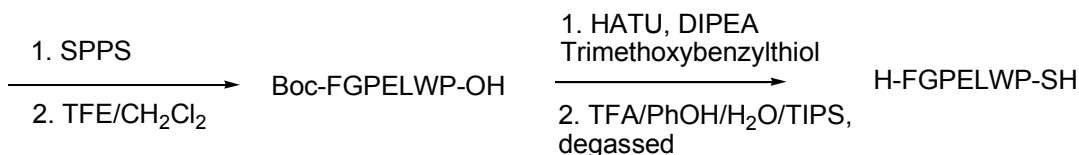

Following the general procedure for SPPS and I, peptide **19** (0.02 mmol) was synthesized by automated Applied Biosystems Pioneer continuous flow peptide synthesizer, employing Fmoc-Pro-NovaSyn® TGT resin and other standard amino acids. According to the general procedure, thioacid **19** (8.2 mg, 48% over two steps) was obtained as a white powder after HPLC (30-50% MeCN/H<sub>2</sub>O over 30 min, Microsorb 100-5 C18 column, 16 mL/min, 230 nm) purification and lyophilization. HR-ESIMS (*m/z*) Calcd for C<sub>43</sub>H<sub>57</sub>N<sub>8</sub>O<sub>9</sub>S: [M+H]<sup>+</sup> *m/z* = 861.3969; Found: 861.3950.

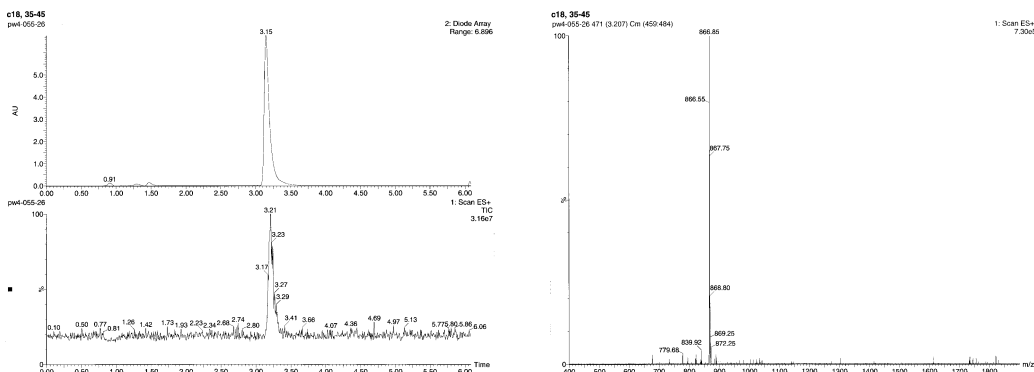

- a) UV and MS traces from UPLC-MS analysis of thioacid **19**: gradient 30-50% CH<sub>3</sub>CN/H<sub>2</sub>O over 6 min at a flow rate of 0.3 mL/min, C18 column. (b) ESI-MS of compound. ESI calcd for C<sub>43</sub>H<sub>57</sub>N<sub>8</sub>O<sub>9</sub>S [M+H]<sup>+</sup> *m/z* = 861.39, found: 861.80.

Ac-Gly-Phe-Gln-Asn-Ser-Thr-Gly-Pro-SFm **37a**

Following the general procedure for SPPS and III (SFm will be cleaved after aspartylation), peptide **37a** (0.02 mmol) was synthesized by automated Applied Biosystems Pioneer continuous flow peptide synthesizer, employing Fmoc-Pro-NovaSyn® TGT resin and other standard amino acids. According to the general procedure, **37a** (12.8 mg, 61% over two steps) was obtained as a white powder after HPLC (30-60% MeCN/H<sub>2</sub>O over 30 min, Microsorb 100-5 C18 column, 16 mL/min, 230 nm) purification and lyophilization.

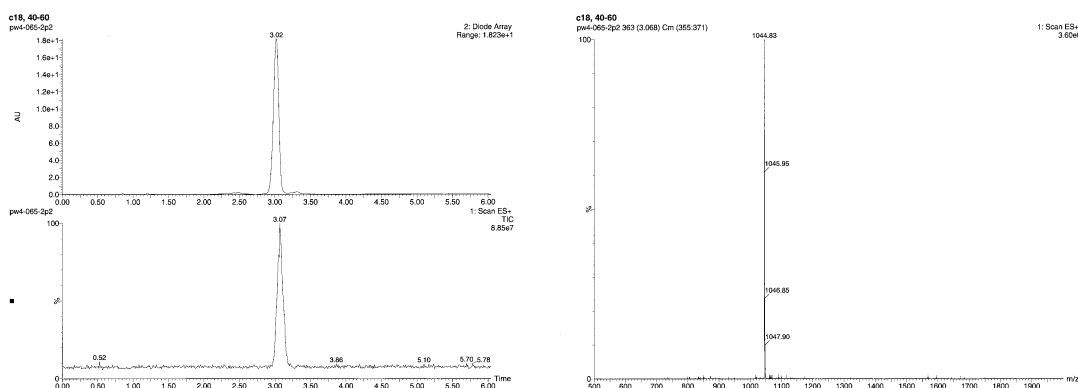

- a) UV and MS traces from UPLC-MS analysis of compound **37a**: gradient 40-60% CH<sub>3</sub>CN/H<sub>2</sub>O over 6 min at a flow rate of 0.3 mL/min, C18 column. (b) ESI-MS of compound. ESIMS (*m/z*) Calcd for C<sub>50</sub>H<sub>62</sub>N<sub>9</sub>O<sub>14</sub>S: [M+H]<sup>+</sup> *m/z* = 1044.41; Found: 1044.83.

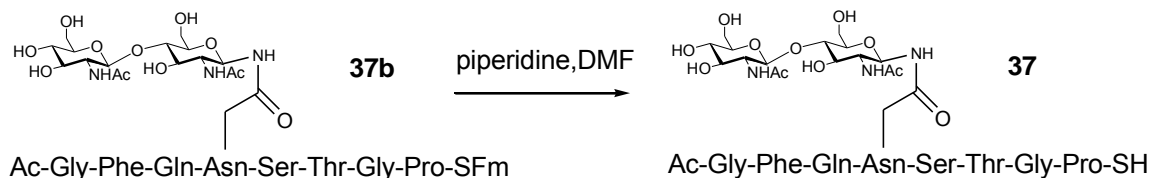

To an oven-dried vial were charged **37a** (2.0 mg, 1.92 μmol), disaccharide (1.6 mg, 3.8 μmol). A stock solution of DIPEA (10 uL in 200 uL DMSO) 20 μL and HATU (33 mg in 200 uL DMSO) 20 uL was added to the vial. The solution was stirred at room temperature for 1 h and quenched by addition of 2 mL MeCN/H<sub>2</sub>O =1/1. The quenched reaction mixture was subject to HPLC purification (20-50% MeCN/H<sub>2</sub>O over 30 min,

Microsorb 100-5 C18 column, 16 mL/min, 265 nm) and lyophilization afforded glycopeptide **37b** (1.9 mg, 68%).

To a solution of the glycopeptides **37b** (1.7 mg, 1.17  $\mu\text{mol}$ ) in anhydrous DMF (60  $\mu\text{L}$ ) was added piperidine (10  $\mu\text{L}$ ) at rt. The reaction mixture was stirred at rt for 20 min. The reaction was concentrated under a stream of nitrogen and the residue was purified by HPLC purification (5-20% MeCN/H<sub>2</sub>O over 30 min, Microsorb 100-5 C18 xbridge column, 16 mL/min, 230 nm) to give thioacid **37** (1.3 mg, 87%).

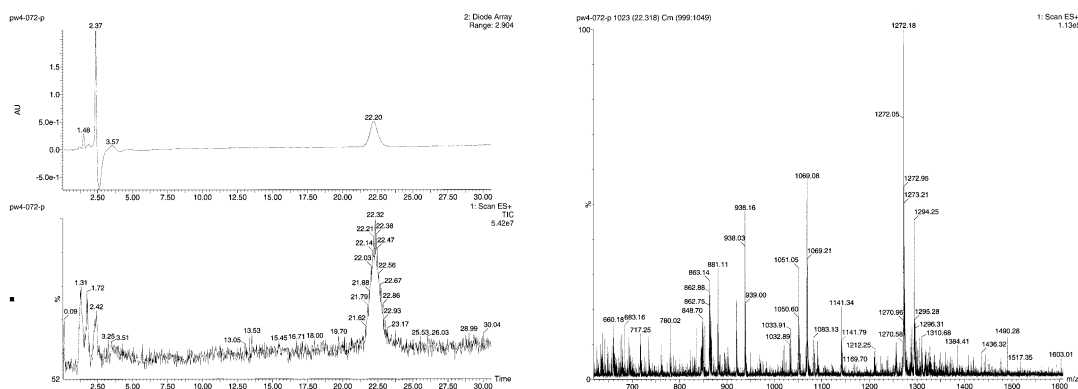

- a) UV and MS traces from LC-MS analysis of glycopeptide **37**: gradient 5-20% CH<sub>3</sub>CN/H<sub>2</sub>O over 30 min at a flow rate of 0.2 mL/min, C18 xbridge column. (b) ESI-MS of compound. ESIMS ( $m/z$ ) Calcd for C<sub>52</sub>H<sub>79</sub>N<sub>12</sub>O<sub>23</sub>S: [M+H]<sup>+</sup>  $m/z$  = 1271.50; Found: 1272.05.

Ac-GC(Acm)MGWYP-SH **46**

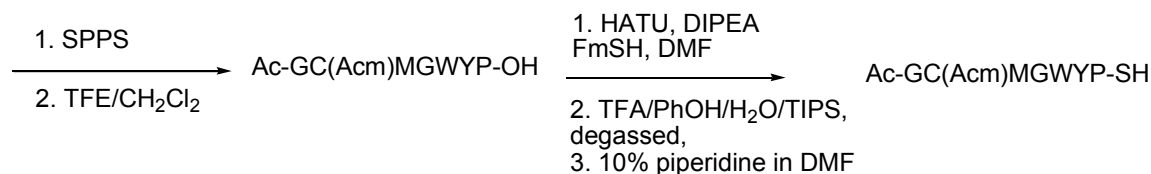

Following the general procedure for SPPS and III (FmSH replace NH<sub>2</sub>-AA-COSFm), peptide **46** (0.02 mmol) was synthesized by automated Applied Biosystems Pioneer continuous flow peptide synthesizer, employing Fmoc-Pro-NovaSyn® TGT resin and other standard Fmoc amino acids. According to the general procedure, thioacid **46** (10.0 mg, 53% over three steps) was obtained as a white powder after HPLC (25-50% MeCN/H<sub>2</sub>O over 30 min, Microsorb 100-5 C18 column, 16 mL/min, 230 nm) purification and lyophilization. HR-ESIMS (*m/z*) Calcd for C<sub>42</sub>H<sub>55</sub>N<sub>9</sub>O<sub>10</sub>S<sub>3</sub>Na: [M+Na]<sup>+</sup> *m/z* = 964.3132; Found: 964.3107.

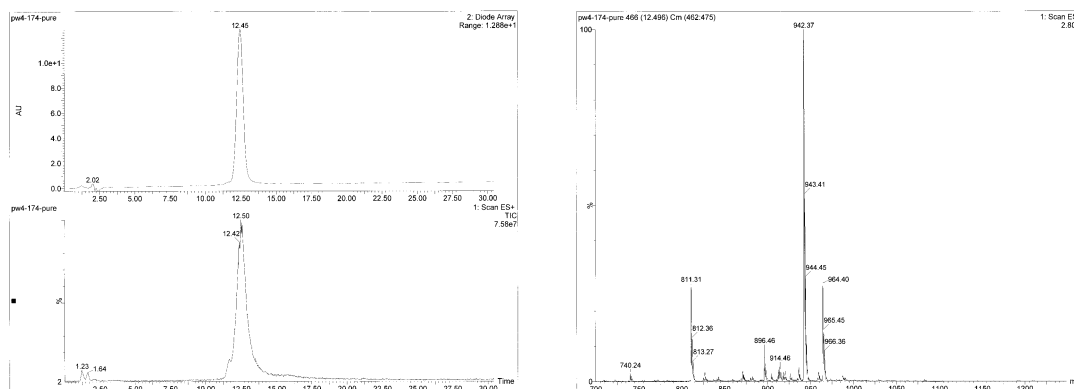

- a) UV and MS traces from LC-MS analysis of thioacid **46**: gradient 25-50% CH<sub>3</sub>CN/H<sub>2</sub>O over 30 min at a flow rate of 0.2 mL/min, C18 column. (b) ESI-MS of compound. ESI calcd for C<sub>42</sub>H<sub>56</sub>N<sub>9</sub>O<sub>10</sub>S<sub>3</sub> [M+H]<sup>+</sup> *m/z* = 942.32, [M+Na]<sup>+</sup> *m/z* = 964.31, found: 942.37, 964.40.

## Peptide Ligation

### 16

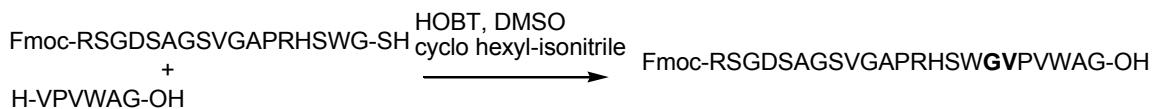

To an oven-dried vial were charged thioacid **7** (1.3 mg, 0.67  $\mu\text{mol}$ ), amine **13** (0.6 mg, 0.96  $\mu\text{mol}$ ) and 4Å MS (2 mg). A stock solution of HOBT/cyclo hexyl-isonitrile (1.8 mg HOBT/6 uL cyclo hexyl-isonitrile in 400 uL DMSO) 40  $\mu\text{L}$  was added to the vial. The solution was stirred at room temperature for 48 h and quenched by addition of 2 mL MeCN/H<sub>2</sub>O =1/1. The quenched reaction mixture was subject to HPLC purification (20-45% MeCN/H<sub>2</sub>O over 30 min, Microsorb 100-5 C4 column, 16 mL/min, 265 nm) and lyophilization afforded peptide **16** (as a white powder (1.4 mg, 82%).

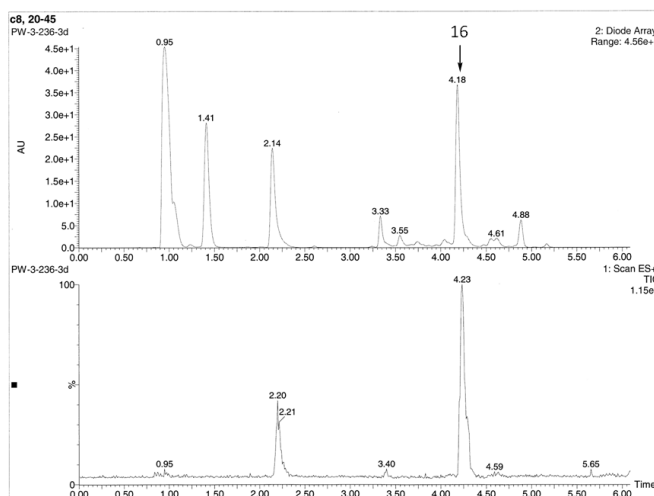

UPLC-MS traces of reaction mixture: gradient 20-45% CH<sub>3</sub>CN/H<sub>2</sub>O over 6 min at a flow rate of 0.3 mL/min, C8 column.

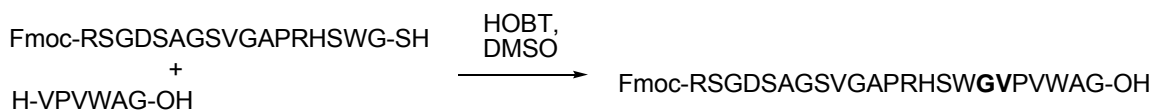

To an oven-dried vial were charged thioacid **7** (0.6 mg, 0.31  $\mu\text{mol}$ ), amine **13** (0.3 mg, 0.48  $\mu\text{mol}$ ) and 4Å MS (2 mg). A stock solution of HOBT (1.2 mg in 2.0 mL DMSO) 20  $\mu\text{L}$  was added to the vial. The solution was stirred at room temperature for 20 h and quenched by addition of 2 mL MeCN/H<sub>2</sub>O =1/1. The quenched reaction mixture was

subject to HPLC purification (20-45% MeCN/H<sub>2</sub>O over 30 min, Microsorb 100-5 C4 column, 16 mL/min, 265 nm) and lyophilization afforded peptide **16** (as a white powder (0.6 mg, 77%).

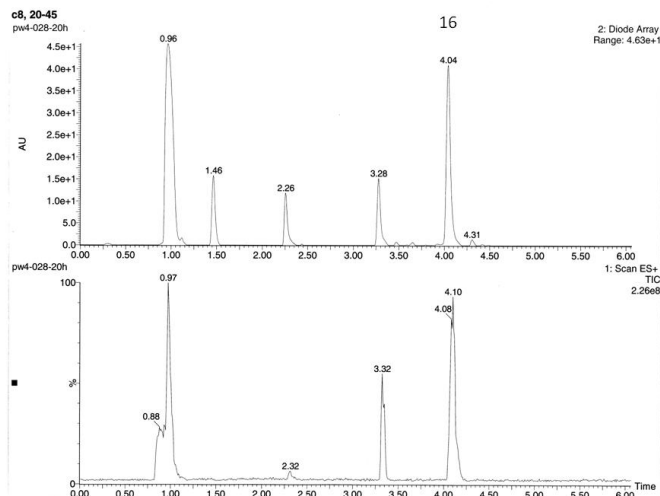

UPLC-MS traces of reaction mixture: gradient 20-45% CH<sub>3</sub>CN/H<sub>2</sub>O over 6 min at a flow rate of 0.3 mL/min, C8 column.

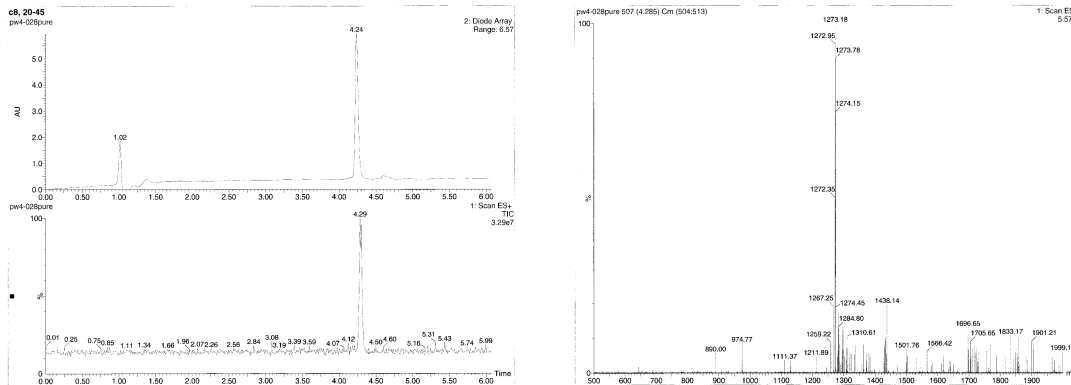

- a) UV and MS traces from UPLC-MS analysis of peptide **16**: gradient 20-45% CH<sub>3</sub>CN/H<sub>2</sub>O over 6 min at a flow rate of 0.3 mL/min, C8 column. (b) ESI-MS of compound. ESI calcd for C<sub>117</sub>H<sub>165</sub>N<sub>34</sub>O<sub>31</sub> [M+H]<sup>+</sup>  $m/z$  = 2542.23, [M+2H]<sup>2+</sup>  $m/z$  = 1272.12; found: 1272.35.



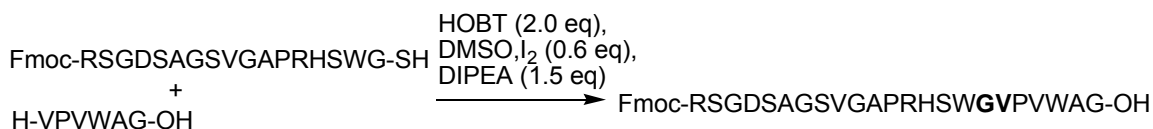

To an oven-dried vial were charged thioacid **7** (0.8 mg, 0.41  $\mu\text{mol}$ ), amine **13** (0.2 mg, 0.32  $\mu\text{mol}$ ), HOBT (0.1 mg, 2.0 eq) and 4 $\text{\AA}$  MS (2 mg). A stock solution of DIPEA (10  $\mu\text{L}$  in 1.0 mL DMSO) 10  $\mu\text{L}$  and I<sub>2</sub> (6.3 mg in 1.0 mL DMSO) 10  $\mu\text{L}$  was added to the vial. The solution was stirred at room temperature for 30 min and quenched by addition of 2 mL MeCN/H<sub>2</sub>O =1/1. The quenched reaction mixture was subject to HPLC purification (20-45% MeCN/H<sub>2</sub>O over 30 min, Microsorb 100-5 C4 column, 16 mL/min, 265 nm) and lyophilization afforded peptide **16** (as a white powder (0.6 mg, 75%).

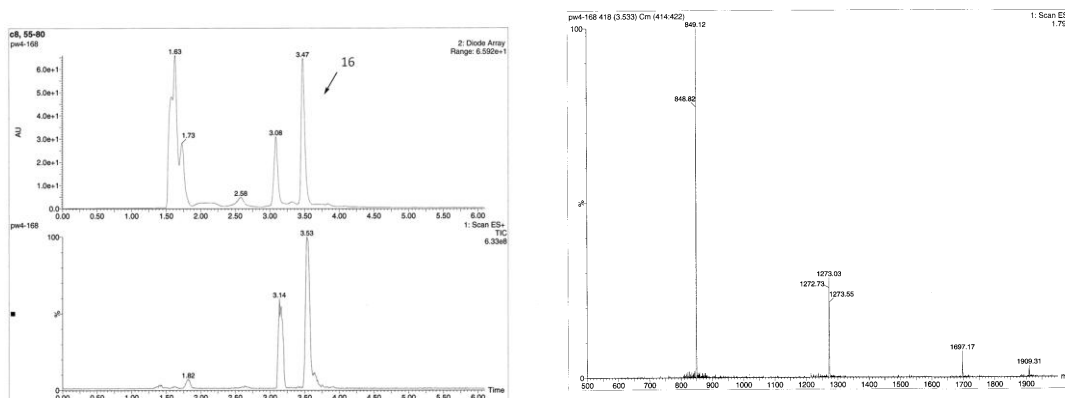

- a) UV and MS traces from UPLC-MS analysis of peptide **16**: gradient 55-80% CH<sub>3</sub>CN/H<sub>2</sub>O over 6 min at a flow rate of 0.3 mL/min, C8 column. (b) ESI-MS of compound. ESI calcd for C<sub>117</sub>H<sub>165</sub>N<sub>34</sub>O<sub>31</sub> [M+H]<sup>+</sup>  $m/z = 2542.23$ , [M+2H]<sup>2+</sup>  $m/z = 1272.12$ ; found: 1272.65.

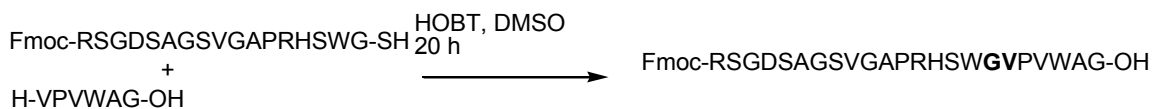

To an oven-dried vial were charged thioacid **7** (0.6 mg, 0.31  $\mu\text{mol}$ ), amine **13** (0.3 mg, 0.48  $\mu\text{mol}$ ) and 4 $\text{\AA}$  MS (2 mg), the mixture was degassed with Argon carefully. 40  $\mu\text{L}$  DMSO (degassed with Argon) was added to the vial. The reaction was run in glove box

at an atmosphere of nitrogen for 20 h, quenched by addition of 2 mL MeCN/H<sub>2</sub>O =1/1. The quenched reaction mixture was subject to UPLC, the conversion of **16** is 7%.

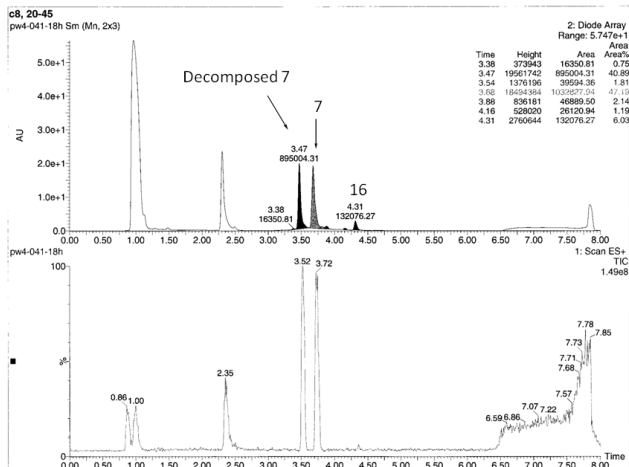

UPLC-MS traces of reaction mixture at 6 h: gradient 20-45% CH<sub>3</sub>CN/H<sub>2</sub>O over 6 min at a flow rate of 0.3 mL/min, C18 column. The conversion of **16** is 7%.

**9**

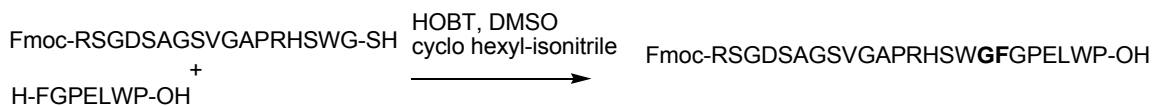

To an oven-dried vial were charged thioacid **7** (1.3 mg, 0.67  $\mu$ mol), amine **8** (0.6 mg, 0.71  $\mu$ mol) and 4Å MS (2 mg). A stock solution of HOBT/cyclo hexyl-isonitrile (0.6 mg HOBT/4  $\mu$ L cyclo hexyl-isonitrile in 250  $\mu$ L DMSO) 25  $\mu$ L was added to the vial. The solution was stirred at room temperature for 20h and quenched by addition of 2 mL MeCN/H<sub>2</sub>O =1/1. The quenched reaction mixture was subject to HPLC purification (20-45% MeCN/H<sub>2</sub>O over 30 min, Microsorb 100-5 C4 column, 16 mL/min, 265 nm) and lyophilization afforded peptide **9** (as a white powder (1.1 mg, 60%).

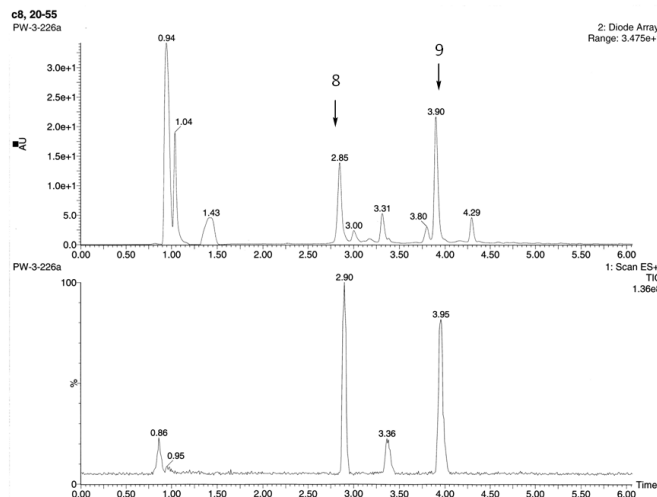

UPLC-MS traces of reaction mixture: gradient 20-55% CH<sub>3</sub>CN/H<sub>2</sub>O over 6 min at a flow rate of 0.3 mL/min, C8 column.

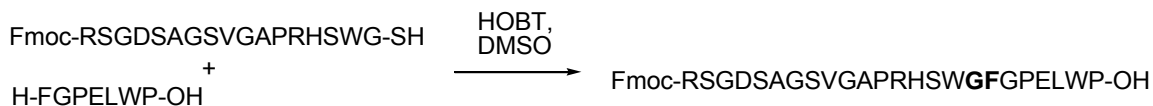

To an oven-dried vial were charged thioacid **7** (0.8 mg, 0.41  $\mu$ mol), peptide **8** (0.3 mg, 0.36  $\mu$ mol) and 4Å MS (2 mg). A stock solution of HOBT (1.0 mg in 300  $\mu$ L DMSO) 30  $\mu$ L was added to the vial. The solution was stirred at room temperature for 12 h and quenched by addition of 2 mL MeCN/H<sub>2</sub>O =1/1. The quenched reaction mixture was subject to HPLC purification (20-45% MeCN/H<sub>2</sub>O over 30 min, Microsorb 100-5 C4 column, 16 mL/min, 265 nm) and lyophilization afforded glycopeptide **9** as a white powder (0.8 mg, 82%).

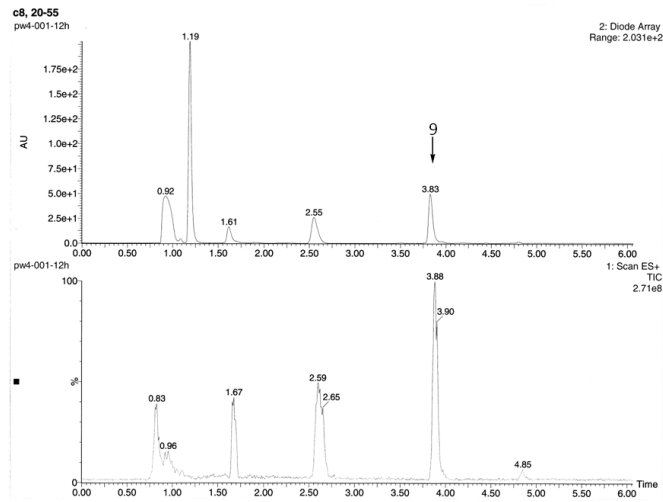

UPLC-MS traces of reaction mixture: gradient 20-55% CH<sub>3</sub>CN/H<sub>2</sub>O over 6 min at a flow rate of 0.3 mL/min, C8 column.

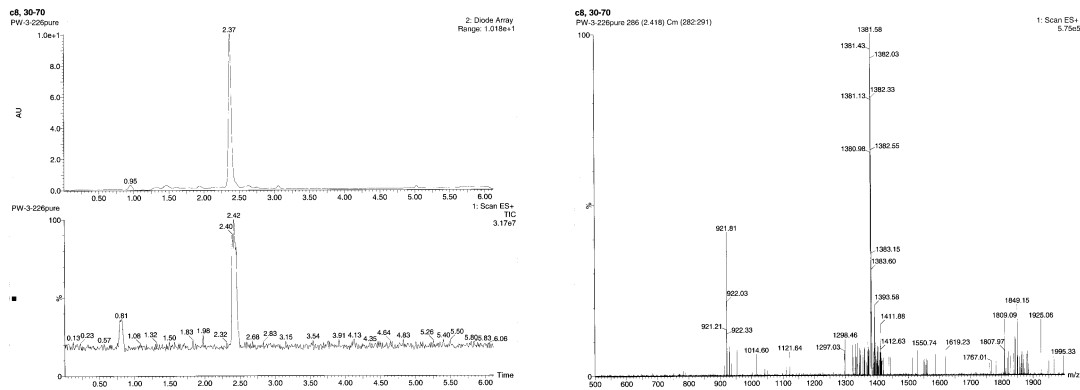

- a) UV and MS traces from UPLC-MS analysis of peptide **9**: gradient 30-70% CH<sub>3</sub>CN/H<sub>2</sub>O over 6 min at a flow rate of 0.3 mL/min, C8 column. (b) ESI-MS of compound. ESI calcd for C<sub>129</sub>H<sub>175</sub>N<sub>34</sub>O<sub>35</sub> [M+H]<sup>+</sup>  $m/z = 2760.29$ , [M+2H]<sup>2+</sup>  $m/z = 1380.65$ , [M+3H]<sup>3+</sup>  $m/z = 920.76$ ; found: 921.06.

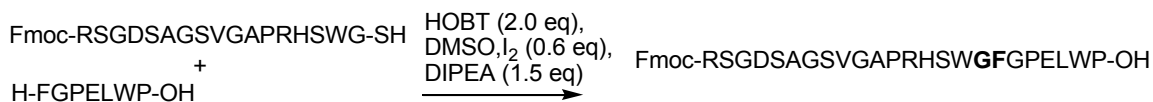

To an oven-dried vial were charged thioacid **7** (0.6 mg, 0.31  $\mu\text{mol}$ ), amine **8** (0.2 mg, 0.24  $\mu\text{mol}$ ) and 4 $\text{\AA}$  MS (2 mg). A stock solution of DIPEA/HOBT (8  $\mu\text{L}$  DIPEA/8 mg HOBT in 1.0 mL DMF) 10  $\mu\text{L}$  and I<sub>2</sub> (4 mg in 1.0 mL DMF) 10  $\mu\text{L}$  was added to the vial. The solution was stirred at room temperature for 30 min and quenched by addition of 2 mL MeCN/H<sub>2</sub>O =1/1. The quenched reaction mixture was subject to HPLC purification (20-45% MeCN/H<sub>2</sub>O over 30 min, Microsorb 100-5 C4 column, 16 mL/min, 265 nm) and lyophilization afforded peptide **9** (as a white powder (0.5 mg, 77%).

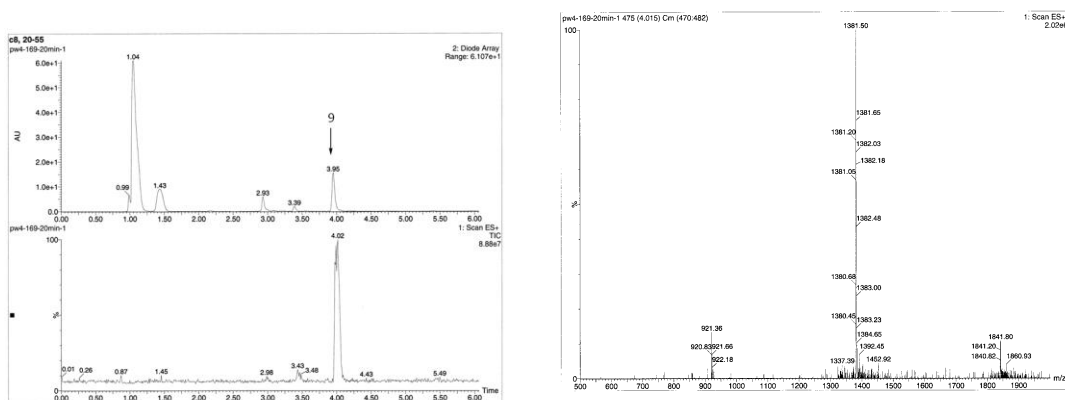

- a) UV and MS traces from UPLC-MS analysis of peptide **9**: gradient 20-55% CH<sub>3</sub>CN/H<sub>2</sub>O over 6 min at a flow rate of 0.3 mL/min, C8 column. (b) ESI-MS of compound. ESI calcd for C<sub>129</sub>H<sub>175</sub>N<sub>34</sub>O<sub>35</sub> [M+H]<sup>+</sup>  $m/z$  = 2760.29, [M+2H]<sup>2+</sup>  $m/z$  = 1380.65, [M+3H]<sup>3+</sup>  $m/z$  = 920.76; found: 1380.68, 920.83.

## 11

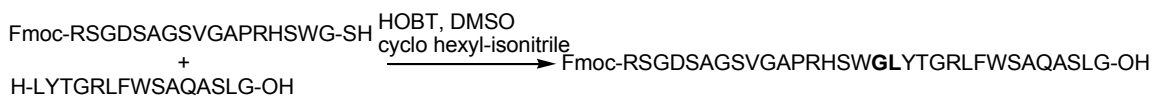

To an oven-dried vial were charged thioacid **7** (0.9 mg, 0.46  $\mu\text{mol}$ ), amine **10** (1.0 mg, 0.60  $\mu\text{mol}$ ) and 4Å MS (2 mg). A stock solution of HOBT/cyclo hexyl-isonitrile (1.3 mg HOBT/6 uL cyclo hexyl-isonitrile in 300 uL DMSO) 30  $\mu\text{L}$  was added to the vial. The solution was stirred at room temperature for 20h and quenched by addition of 2 mL MeCN/H<sub>2</sub>O =1/1. The quenched reaction mixture was subject to HPLC purification (20-45% MeCN/H<sub>2</sub>O over 30 min, Microsorb 100-5 C4 column, 16 mL/min, 265 nm) and lyophilization afforded peptide **11** (as a white powder (1.2 mg, 73%).

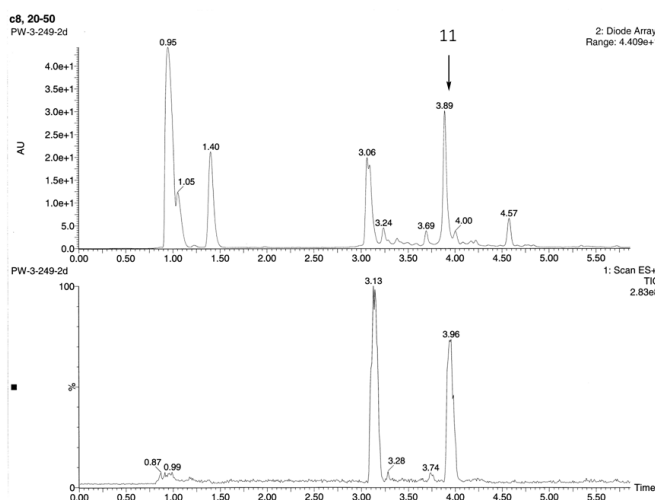

UPLC-MS traces of reaction mixture: gradient 20-50% CH<sub>3</sub>CN/H<sub>2</sub>O over 6 min at a flow rate of 0.3 mL/min, C8 column.

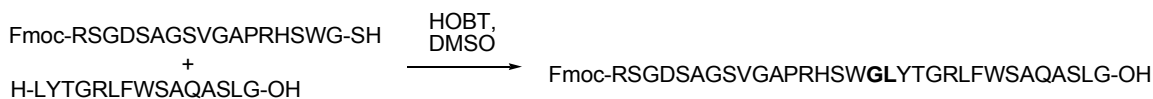

To an oven-dried vial were charged thioacid **7** (1.0 mg, 0.51  $\mu\text{mol}$ ), amine **10** (0.7 mg, 0.42  $\mu\text{mol}$ ) and 4Å MS (2 mg). A stock solution of HOBT (1.4 mg in 300 uL DMSO) 30  $\mu\text{L}$  was added to the vial. The solution was stirred at room temperature for 12 h and quenched by addition of 2 mL MeCN/H<sub>2</sub>O =1/1. The quenched reaction mixture was subject to HPLC purification (20-50% MeCN/H<sub>2</sub>O over 30 min, Microsorb 100-5 C4

column, 16 mL/min, 265 nm) and lyophilization afforded peptide **11** (1.2 mg, 80%) as a white powder.

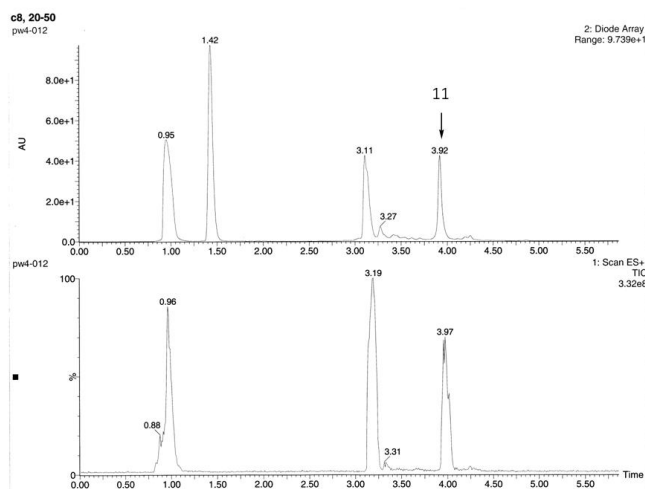

UPLC-MS traces of reaction mixture: gradient 20-50% CH<sub>3</sub>CN/H<sub>2</sub>O over 6 min at a flow rate of 0.3 mL/min, C8 column.

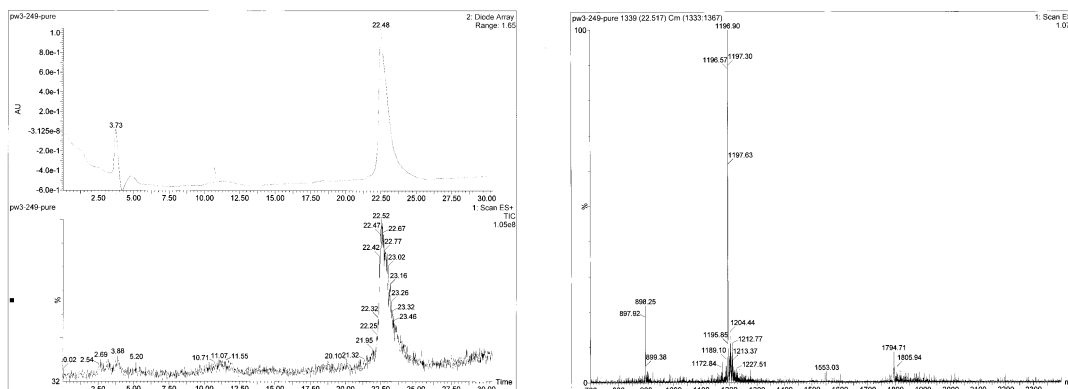

- a) UV and MS traces from UPLC-MS analysis of peptide **11**: gradient 20-45% CH<sub>3</sub>CN/H<sub>2</sub>O over 6 min at a flow rate of 0.3 mL/min, C8 column. (b) ESI-MS of compound. ESI calcd for C<sub>164</sub>H<sub>234</sub>N<sub>46</sub>O<sub>46</sub> [M+H]<sup>+</sup>  $m/z$  = 3584.74, [M+2H]<sup>2+</sup>  $m/z$  = 1793.37, [M+3H]<sup>3+</sup>  $m/z$  = 1195.58; found: 1195.85.

## 14

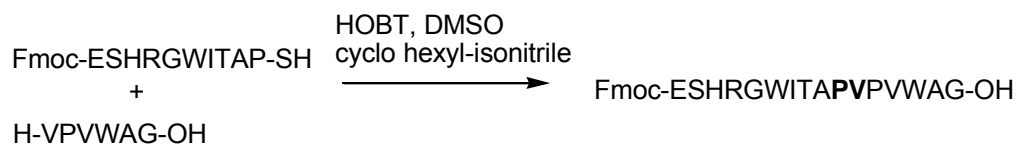

To an oven-dried vial were charged thioacid **12** (0.7 mg, 0.50  $\mu\text{mol}$ ), amine **13** (0.5 mg, 0.80  $\mu\text{mol}$ ) and 4Å MS (2 mg). A stock solution of HOBT/cyclo hexyl-isonitrile (1.4 mg HOBT/5  $\mu\text{L}$  cyclo hexyl-isonitrile in 400  $\mu\text{L}$  DMSO) 40  $\mu\text{L}$  was added to the vial. The solution was stirred at room temperature for 48h and quenched by addition of 2 mL MeCN/H<sub>2</sub>O =1/1. The quenched reaction mixture was subject to HPLC purification (20-45% MeCN/H<sub>2</sub>O over 30 min, Microsorb 100-5 C4 column, 16 mL/min, 265 nm) and lyophilization afforded peptide **14** (as a white powder (0.8 mg, 80%).

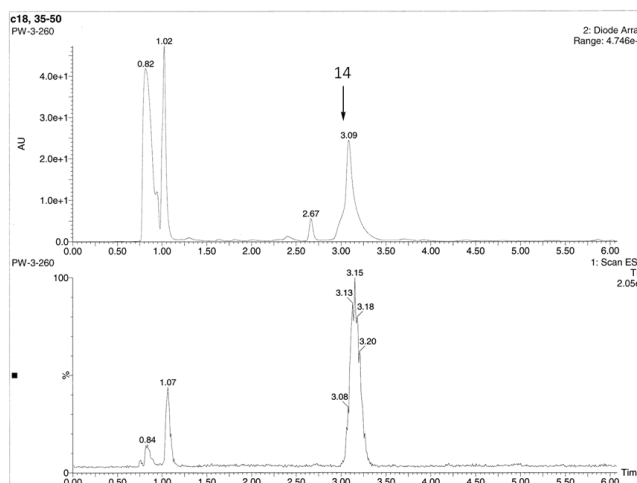

UPLC-MS traces of reaction mixture: gradient 35-50% CH<sub>3</sub>CN/H<sub>2</sub>O over 6 min at a flow rate of 0.3 mL/min, C18 column.

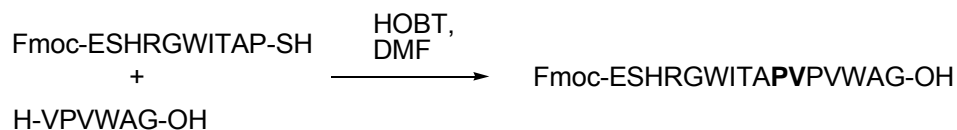

To an oven-dried vial were charged thioacid **12** (0.8 mg, 0.57  $\mu\text{mol}$ ), peptide **13** (0.4 mg, 0.69  $\mu\text{mol}$ ) and 4Å MS (2 mg). A stock solution of HOBT (1.4 mg in 250  $\mu\text{L}$  DMF) 25  $\mu\text{L}$  was added to the vial. The solution was stirred at room temperature for 6 h and quenched by addition of 2 mL MeCN/H<sub>2</sub>O =1/1. The quenched reaction mixture was



subject to HPLC purification (45-60% MeCN/H<sub>2</sub>O over 30 min, Microsorb 100-5 C18 column, 16 mL/min, 265 nm) and lyophilization afforded peptide **14** (1.0 mg, 87%) as a white powder.

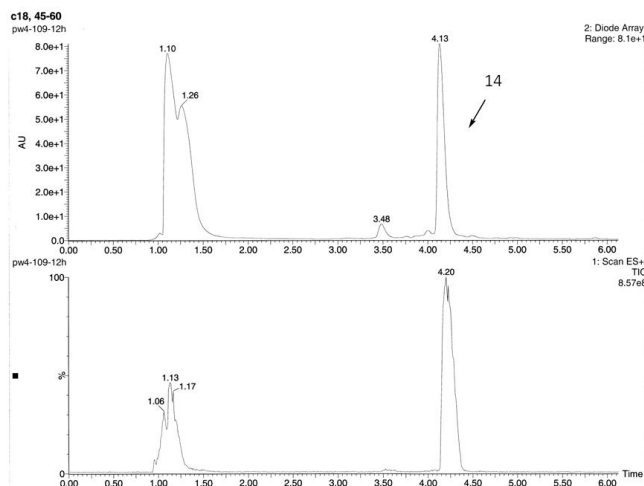

UPLC-MS traces of reaction mixture: gradient 45-60% CH<sub>3</sub>CN/H<sub>2</sub>O over 6 min at a flow rate of 0.3 mL/min, C18 column.

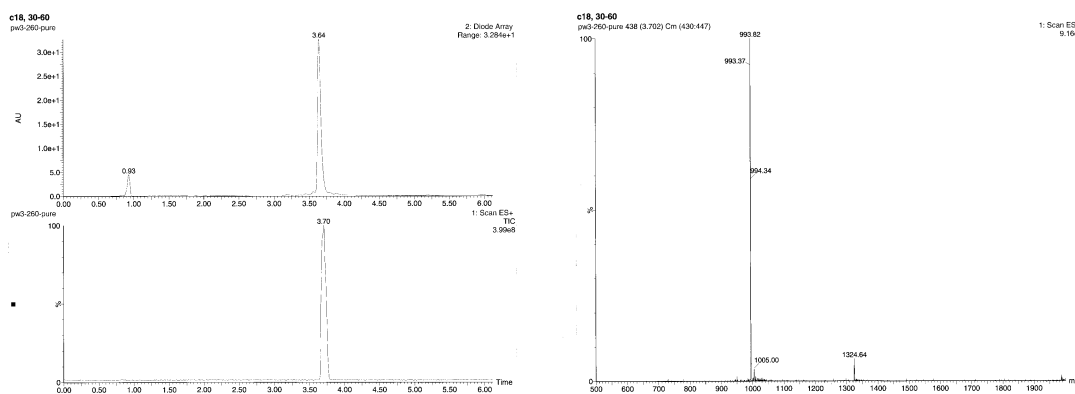

- a) UV and MS traces from UPLC-MS analysis of peptide **14**: gradient 20-45% CH<sub>3</sub>CN/H<sub>2</sub>O over 6 min at a flow rate of 0.3 mL/min, C8 column. (b) ESI-MS of compound. ESI calcd for C<sub>97</sub>H<sub>129</sub>N<sub>23</sub>O<sub>23</sub> [M+H]<sup>+</sup>  $m/z = 1984.96$ , [M+2H]<sup>2+</sup>  $m/z = 992.93$ ; found: 993.37.



## 15

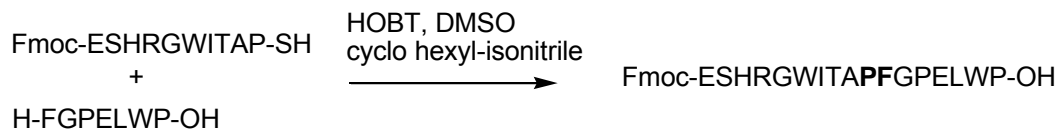

To an oven-dried vial were charged thioacid **12** (0.6 mg, 0.43  $\mu\text{mol}$ ), amine **8** (0.3 mg, 0.36  $\mu\text{mol}$ ) and 4Å MS (2 mg). A stock solution of HOBT/cyclo hexyl-isonitrile (1.2 mg HOBT/4  $\mu\text{L}$  cyclo hexyl-isonitrile in 400  $\mu\text{L}$  DMSO) 40  $\mu\text{L}$  was added to the vial. The solution was stirred at room temperature for 48h and quenched by addition of 2 mL MeCN/H<sub>2</sub>O =1/1. The quenched reaction mixture was subject to HPLC purification (20-45% MeCN/H<sub>2</sub>O over 30 min, Microsorb 100-5 C4 column, 16 mL/min, 265 nm) and lyophilization afforded peptide **15** (as a white powder (0.6 mg, 78%).

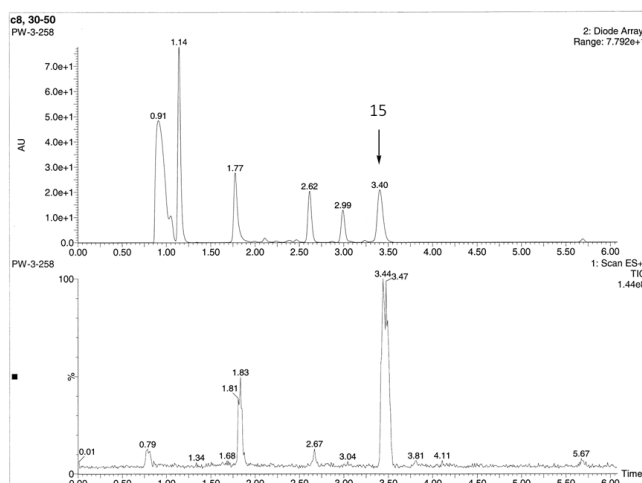

UPLC-MS traces of reaction mixture: gradient 30-50% CH<sub>3</sub>CN/H<sub>2</sub>O over 6 min at a flow rate of 0.3 mL/min, C8 column.

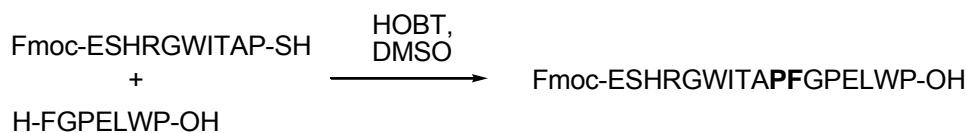

To an oven-dried vial were charged peptide **12** (1.0 mg, 0.72  $\mu\text{mol}$ ), amine **8** (0.5 mg, 0.59  $\mu\text{mol}$ ) and 4Å MS (2 mg). A stock solution of HOBT (2.9 mg in 3 mL DMSO) 30  $\mu\text{L}$  was added to the vial. The solution was stirred at room temperature for 20 h and quenched by addition of 2 mL MeCN/H<sub>2</sub>O =1/1. The quenched reaction mixture was

subject to HPLC purification (30-50% MeCN/H<sub>2</sub>O over 30 min, Microsorb 100-5 C4 column, 16 mL/min, 265 nm) and lyophilization afforded peptide **15** (0.9 mg, 70%) as a white powder.

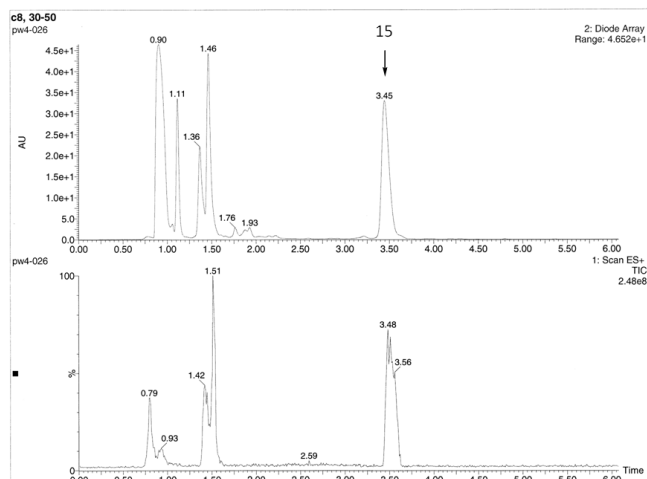

UPLC-MS traces of reaction mixture: gradient 30-50% CH<sub>3</sub>CN/H<sub>2</sub>O over 6 min at a flow rate of 0.3 mL/min, C8 column.

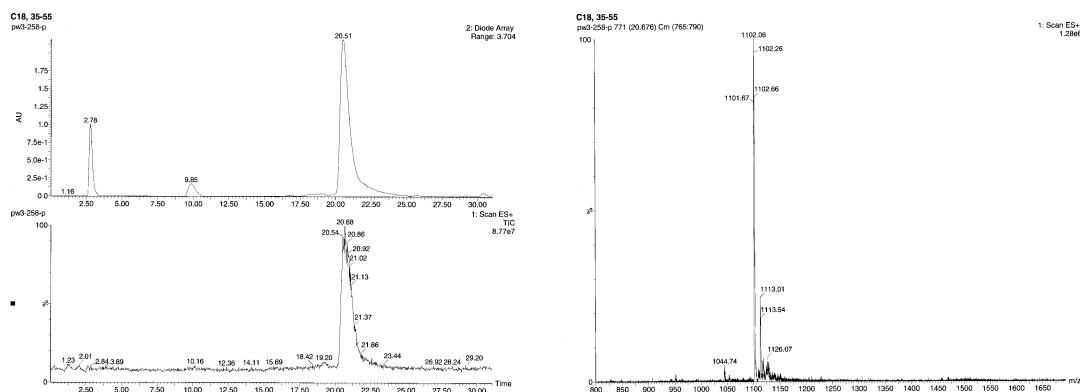

- a) UV and MS traces from UPLC-MS analysis of peptide **15**: gradient 35-55% CH<sub>3</sub>CN/H<sub>2</sub>O over 30 min at a flow rate of 0.2 mL/min, C18 column. (b) ESI-MS of compound. ESI calcd for C<sub>109</sub>H<sub>140</sub>N<sub>24</sub>O<sub>26</sub> [M+H]<sup>+</sup>  $m/z$  = 2202.04, [M+2H]<sup>2+</sup>  $m/z$  = 1101.52; found: 1101.67.

## 47

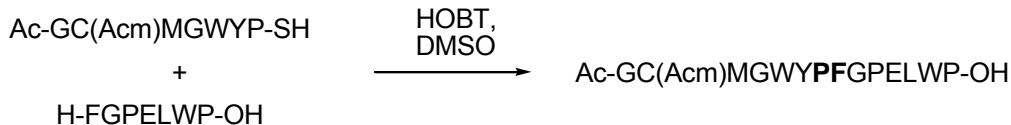

To an oven-dried vial were charged peptide **46** (0.6 mg, 0.64  $\mu\text{mol}$ ), peptide **8** (0.4 mg, 0.47  $\mu\text{mol}$ ) and 4Å MS (1 mg). A stock solution of HOBT (1.7 mg in 250  $\mu\text{L}$  DMSO) 25  $\mu\text{L}$  was added to the vial. The solution was stirred at room temperature for 6 h and quenched by addition of 2 mL MeCN/H<sub>2</sub>O =1/1. The quenched reaction mixture was subject to HPLC purification (35-50% MeCN/H<sub>2</sub>O over 30 min, Microsorb 100-5 C18 column, 16 mL/min, 230 nm) and lyophilization afforded peptide **47** (0.7 mg, 85%) as a white powder.

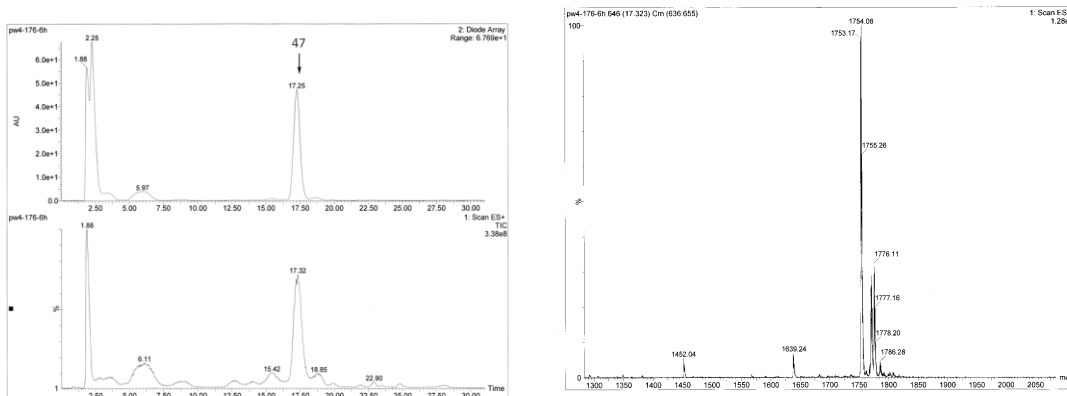

LC-MS traces of reaction mixture: gradient 25-50% CH<sub>3</sub>CN/H<sub>2</sub>O over 3 min at a flow rate of 0.2 mL/min, C18 column. (b) ESI calcd for C<sub>85</sub>H<sub>110</sub>N<sub>17</sub>O<sub>20</sub>S<sub>2</sub> [M+H]<sup>+</sup> *m/z* = 1752.75; found: 1753.17.

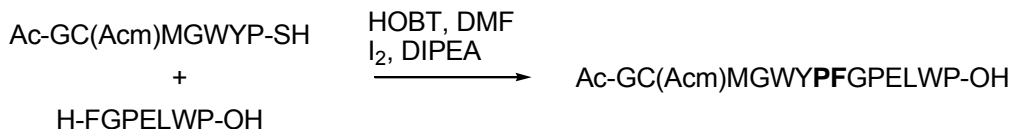

To an oven-dried vial were charged thioacid **46** (0.8 mg, 0.85  $\mu\text{mol}$ ), amine **8** (0.6 mg, 0.71  $\mu\text{mol}$ ) and 4Å MS (1 mg). A stock solution of DIPEA/HOBT (17  $\mu\text{L}$  DIPEA/1.7 mg HOBT in 1.0 mL DMF) 10  $\mu\text{L}$  and I<sub>2</sub> (9 mg in 1.0 mL DMF) 10  $\mu\text{L}$  was added to the vial. The solution was stirred at room temperature for 30 min and quenched by addition of 2 mL MeCN/H<sub>2</sub>O =1/1. The quenched reaction mixture was subject to HPLC purification

(20-45% MeCN/H<sub>2</sub>O over 30 min, Microsorb 100-5 C18 column, 16 mL/min, 230 nm) and lyophilization afforded peptide **47** (as a white powder (1.0 mg, 80%).

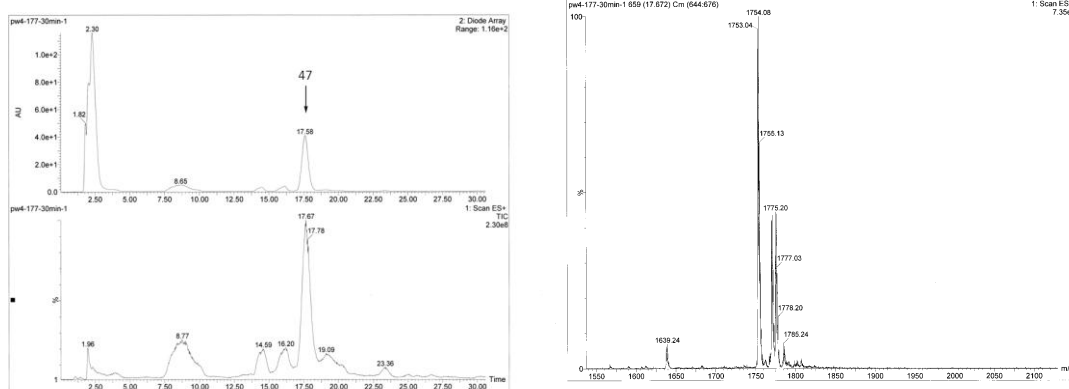

UPLC-MS traces of reaction mixture: gradient 25-50% CH<sub>3</sub>CN/H<sub>2</sub>O over 30 min at a flow rate of 0.2 mL/min, C8 column.

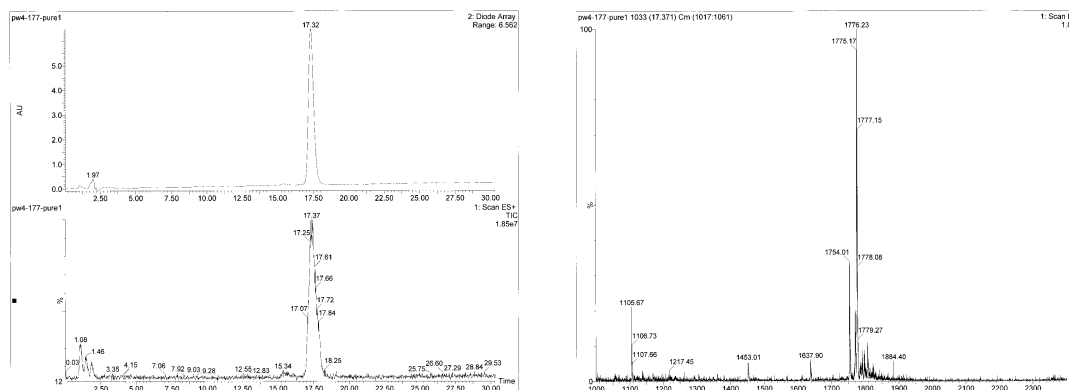

- a) UV and MS traces from LC-MS analysis of peptide **47**: gradient 25-50% CH<sub>3</sub>CN/H<sub>2</sub>O over 30 min at a flow rate of 0.2 mL/min, C18 column. (b) ESI-MS of compound. ESI calcd for C<sub>85</sub>H<sub>110</sub>N<sub>17</sub>O<sub>20</sub>S<sub>2</sub> [M+H]<sup>+</sup> *m/z* = 1752.75; found: 1753.04.

## 18

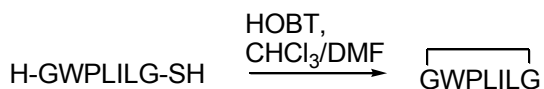

To an oven-dried vial were charged thioacid **17** (0.9 mg, 1.2  $\mu\text{mol}$ ) and 4Å MS (10 mg). A stock solution of HOBT (0.3 mg in 1 mL DMF/CHCl<sub>3</sub> 1:1, v/v) was added to the vial. The solution was stirred at room temperature for 48 h. The reaction was concentrated under a stream of nitrogen. The residue was subject to HPLC purification (30-60% MeCN/H<sub>2</sub>O over 30 min, Microsorb 100-5 C18 column, 16 mL/min, 225 nm) and lyophilization afforded cyclopeptide **18** (0.7 mg, 81%) as a white powder. HR-ESIMS ( $m/z$ ) Calcd for C<sub>36</sub>H<sub>55</sub>N<sub>7</sub>O<sub>8</sub>Na: [M+Na]<sup>+</sup>  $m/z$  = 736.4010; Found: 736.3994.

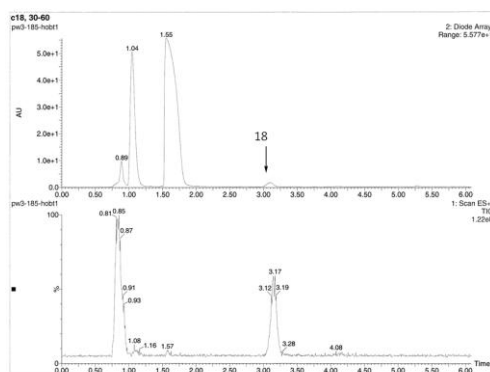

UPLC-MS traces of reaction mixture: gradient 30-60% CH<sub>3</sub>CN/H<sub>2</sub>O over 6 min at a flow rate of 0.3 mL/min, C18 column.

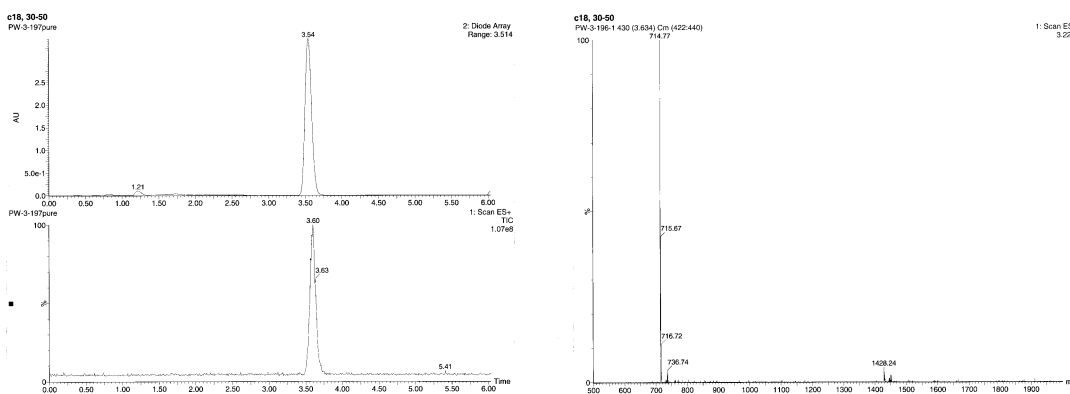

- a) UV and MS traces from UPLC-MS analysis of peptide **18**: gradient 30-50% CH<sub>3</sub>CN/H<sub>2</sub>O over 6 min at a flow rate of 0.3 mL/min, C18 column. (b) ESI-MS of compound. ESI calcd for C<sub>36</sub>H<sub>57</sub>N<sub>7</sub>O<sub>8</sub> [M+H]<sup>+</sup>  $m/z$  = 714.41; found: 714.77.

## 20

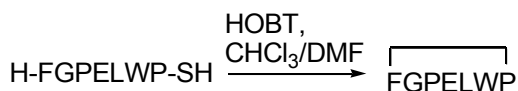

To an oven-dried vial were charged thioacid **19** (1.3 mg, 1.4  $\mu\text{mol}$ ) and 4Å MS (10 mg). A stock solution of HOBT (0.3 mg in 1 mL DMF/CHCl<sub>3</sub> 1:1, v/v) was added to the vial. The solution was stirred at room temperature for 48 h. The reaction was concentrated under a stream of nitrogen. The residue was subject to HPLC purification (30-60% MeCN/H<sub>2</sub>O over 30 min, Microsorb 100-5 C18 column, 16 mL/min, 225 nm) and lyophilization afforded cyclopeptide **20** (1.0 mg, 80%) as a white powder. HR-ESIMS ( $m/z$ ) Calcd for C<sub>43</sub>H<sub>54</sub>N<sub>8</sub>O<sub>9</sub>Na: [M+Na]<sup>+</sup>  $m/z$  = 849.3911; Found: 849.3904.

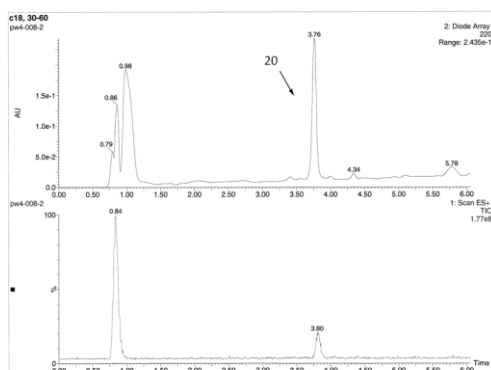

UPLC-MS traces of reaction mixture: gradient 30-60% CH<sub>3</sub>CN/H<sub>2</sub>O over 6 min at a flow rate of 0.3 mL/min, C18 column.

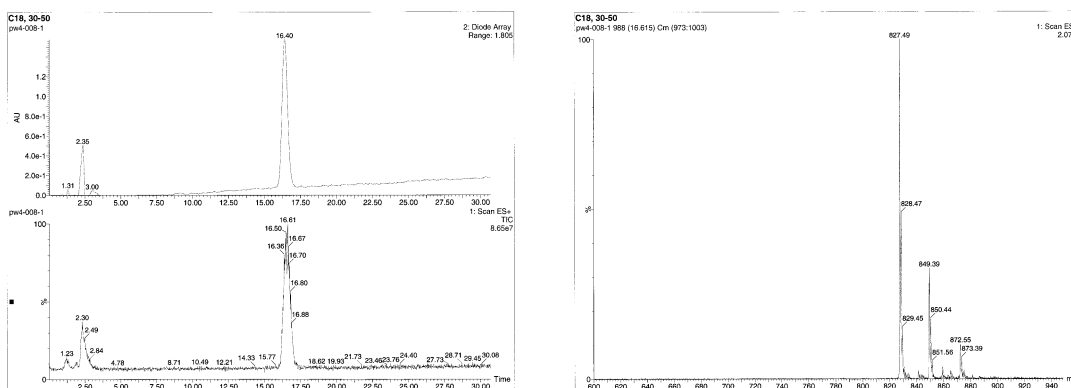

- a) UV and MS traces from LC-MS analysis of cyclopeptide **20**: gradient 30-50% CH<sub>3</sub>CN/H<sub>2</sub>O over 30 min at a flow rate of 0.2 mL/min, C18 column. (b) ESI-MS of compound. ESI calcd for C<sub>43</sub>H<sub>55</sub>N<sub>8</sub>O<sub>9</sub> [M+H]<sup>+</sup>  $m/z$  = 827.40; found: 827.49.



23

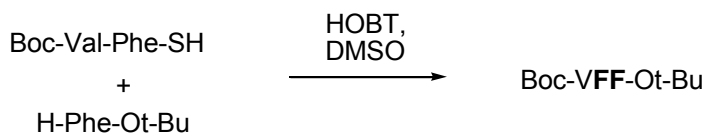

To an oven-dried vial were charged thioacid **21** (0.6 mg, 1.6  $\mu\text{mol}$ ), amine **22** (0.4 mg, 1.8  $\mu\text{mol}$ ) and 4Å MS (2 mg). A stock solution of HOBT (3.5 mg in 500  $\mu\text{L}$  DMF) 50  $\mu\text{L}$  was added to the vial. The solution was stirred at room temperature for 6 h. The reaction mixture was subject to a silica gel column and eluted with hexanes/ethyl acetate (3:1-2:1) to give peptide **23** (0.8 mg, 90%, L/D mixture, L/D = 9:1) as a white powder.

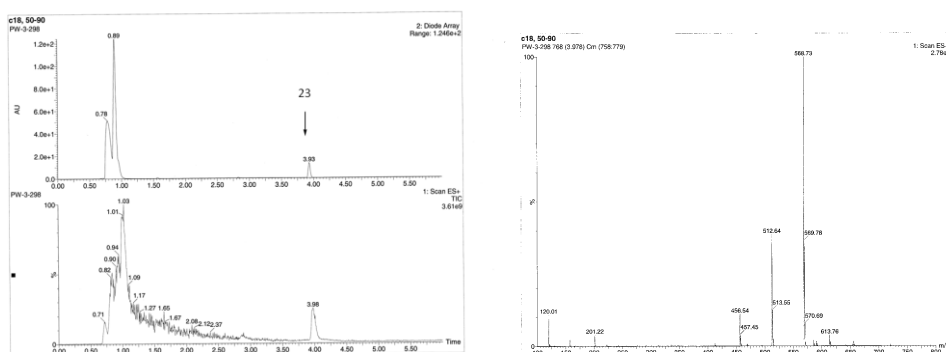

- a) UPLC-MS traces of reaction mixture: gradient 50-90%  $\text{CH}_3\text{CN}/\text{H}_2\text{O}$  over 6 min at a flow rate of 0.3 mL/min, C18 column. (b) ESI-MS of compound. ESI calcd for  $\text{C}_{32}\text{H}_{46}\text{N}_3\text{O}_6$ :  $[\text{M}+\text{H}]^+$   $m/z = 568.34$ ; Found: 568.73.

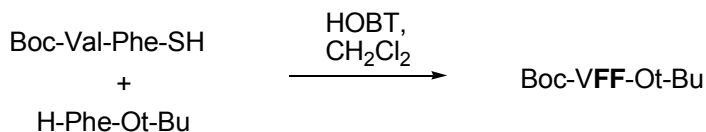

To an oven-dried vial were charged thioacid **21** (3.0 mg, 7.9  $\mu\text{mol}$ ), amine **22** (2.1 mg, 9.5  $\mu\text{mol}$ ) and 4Å MS (2 mg). A stock solution of HOBT (2 mg in 150  $\mu\text{L}$   $\text{CH}_2\text{Cl}_2$ ) 150  $\mu\text{L}$  was added to the vial. The solution was stirred at room temperature for 3 h. The reaction mixture was subject to a silica gel column and eluted with hexanes/ethyl acetate (3:1-2:1) to give peptide **23** (4.0 mg, 89%) as a white powder.  $^1\text{H}$  NMR (600 MHz,  $\text{CDCl}_3$ ):  $\delta$  7.26-7.24 (m, 2 H), 7.18-7.16 (m, 6 H), 6.99 (d, 2 H,  $J = 6.7$  Hz), 6.40 (d, 1 H,  $J = 6.6$  Hz), 6.10 (d, 1 H,  $J = 6.0$  Hz), 4.87 (d, 1 H,  $J = 6.1$  Hz), 4.60-4.55 (m, 2 H), 3.86 (d, 1 H,  $J = 6.1$  Hz), 3.09-3.06 (m, 1 H), 3.99-3.96 (m, 3 H), 2.08-2.05 (m, 1 H), 1.41 (s, 9 H), 1.33 (s, 9 H), 0.86 (d, 3 H,  $J = 6.7$  Hz), 0.77 (d, 3 H,  $J = 6.0$  Hz);  $^{13}\text{C}$  NMR (150 MHz,  $\text{CDCl}_3$ ):  $\delta$  171.3, 169.74, 169.72, 136.3, 135.9, 129.4, 129.3, 128.7, 128.4, 127.1, 127.0, 82.4, 54.3, 53.8, 38.3, 38.0, 30.7, 29.7, 28.3, 27.9, 19.2, 17.4; HR-ESIMS ( $m/z$ ) Calcd for  $\text{C}_{32}\text{H}_{46}\text{N}_3\text{O}_6$ :  $[\text{M}+\text{H}]^+$   $m/z = 568.3387$ ; Found: 568.3376.

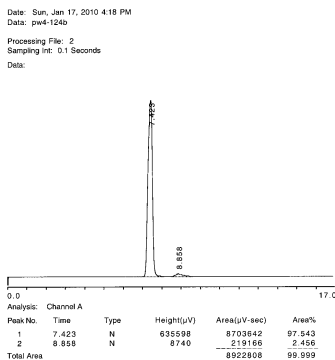

LC traces of **23**: gradient 1-3% isopropanol/hexane over 20 min at a flow rate of 0.5 mL/min, Chiralcel OD-H column.

25

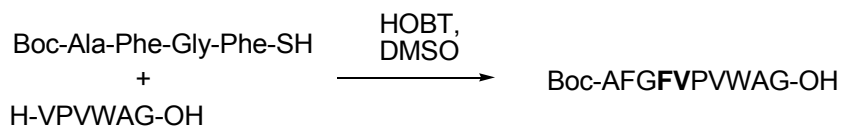

To an oven-dried vial were charged thioacid **24** (1.2 mg, 2.2  $\mu\text{mol}$ ), amine **13** (0.9 mg, 1.4  $\mu\text{mol}$ ) and 4Å MS (2 mg). A stock solution of HOBT (4.8 mg in 500  $\mu\text{L}$  DMSO) 50  $\mu\text{L}$  was added to the vial. The solution was stirred at room temperature for 12 h and quenched by addition of 2 mL MeCN/H<sub>2</sub>O =1/1. The quenched reaction mixture was subject to HPLC purification (35-50% MeCN/H<sub>2</sub>O over 30 min, Microsorb 100-5 C18 column, 16 mL/min, 230 nm) and lyophilization afforded peptide **25** (1.4 mg, 85%) as a white powder. HR-ESIMS ( $m/z$ ) Calcd for C<sub>59</sub>H<sub>79</sub>N<sub>11</sub>O<sub>13</sub>Na: [M+Na]<sup>+</sup>  $m/z$  = 1172.5757; Found: 1172.5811.

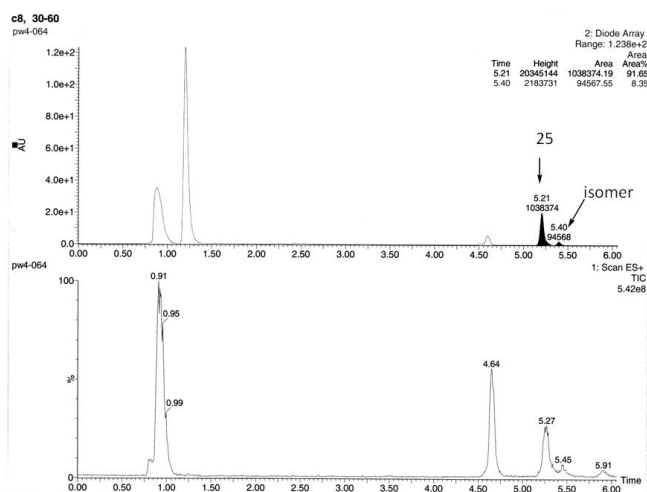

UPLC-MS traces of reaction mixture: gradient 30-60% CH<sub>3</sub>CN/H<sub>2</sub>O over 6 min at a flow rate of 0.3 mL/min, C18 column.

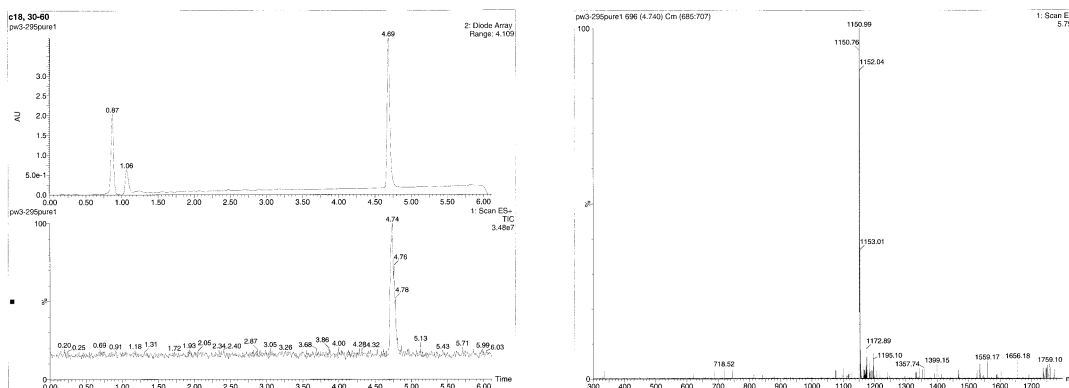

- a) UV and MS traces from UPLC-MS analysis of peptide **25**: gradient 20-45% CH<sub>3</sub>CN/H<sub>2</sub>O over 6 min at a flow rate of 0.3 mL/min, C8 column. (b) ESI-MS of compound. ESI calcd for C<sub>59</sub>H<sub>79</sub>N<sub>11</sub>O<sub>13</sub> [M+H]<sup>+</sup> *m/z* = 1150.56; found: 1150.99.

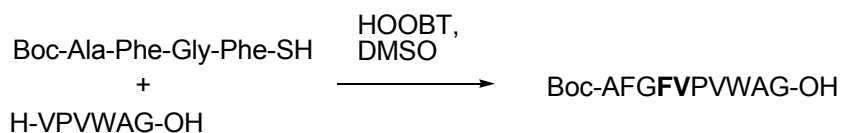

To an oven-dried vial were charged thioacid **24** (0.7 mg, 1.3 μmol), amine **13** (0.6 mg, 0.96 μmol) and 4Å MS (2 mg). A stock solution of HOBT (4.0 mg in 300 μL DMSO) 30 μL was added to the vial. The solution was stirred at room temperature for 6 h and quenched by addition of 2 mL MeCN/H<sub>2</sub>O =1/1. The quenched reaction mixture was subject to HPLC purification (35-50% MeCN/H<sub>2</sub>O over 30 min, Microsorb 100-5 C18 column, 16 mL/min, 230 nm) and lyophilization afforded peptide **25** (0.9 mg, 82%) as a white powder.

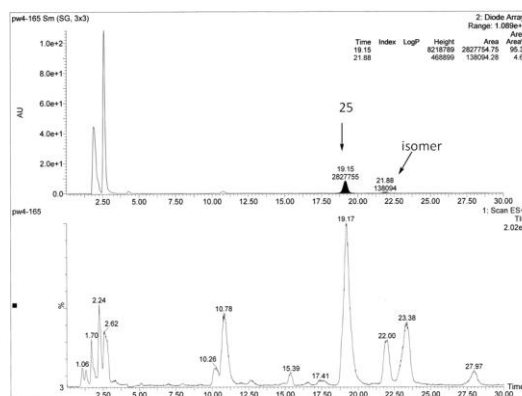

LC-MS traces of reaction mixture: gradient 20-45% CH<sub>3</sub>CN/H<sub>2</sub>O over 30 min at a flow rate of 0.2 mL/min, C18 Xbridge column.

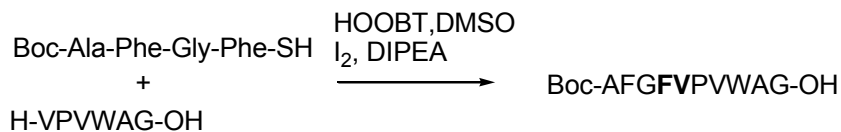

To an oven-dried vial were peptide **24** (0.6 mg, 1.1 μmol), amine **13** (0.4 mg, 0.64 μmol) and 4Å MS (2 mg). A stock solution of DIPEA/HOObt (28 uL DIPEA/40 mg HOObt in 1.5 mL DMF) 15 uL and I<sub>2</sub> (16 mg in 1.5 mL DMF) 15 μL was added to the vial. The solution was stirred at room temperature for 30 min and quenched by addition of 2 mL MeCN/H<sub>2</sub>O =1/1. The quenched reaction mixture was subject to HPLC purification (20-45% MeCN/H<sub>2</sub>O over 30 min, Microsorb 100-5 C4 column, 16 mL/min, 265 nm) and lyophilization afforded peptide **25** (as a white powder (0.6 mg, 82%).

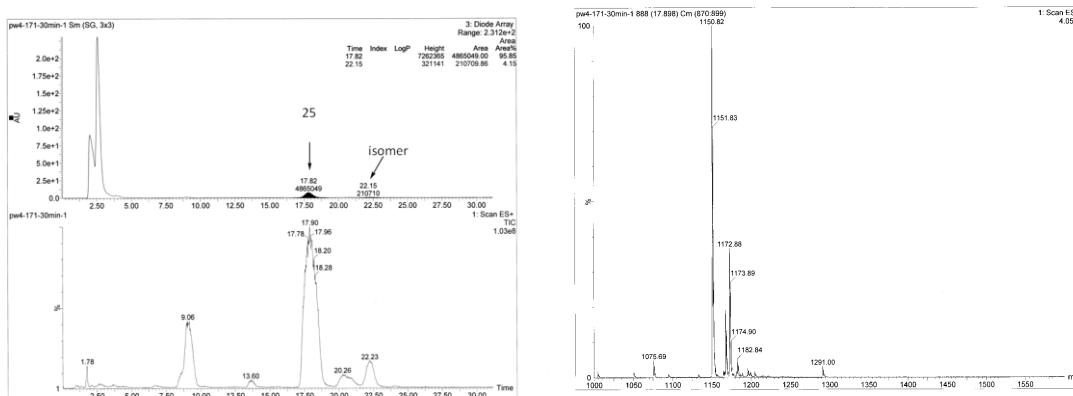

- a) UV and MS traces from LC-MS analysis of peptide **25**: gradient 20-45% CH<sub>3</sub>CN/H<sub>2</sub>O over 6 min at a flow rate of 0.2 mL/min, C18 Xbridge column. (b) ESI-MS of compound. ESI calcd for C<sub>59</sub>H<sub>79</sub>N<sub>11</sub>O<sub>13</sub> [M+H]<sup>+</sup> *m/z* = 1150.56; found: 1150.82.

27

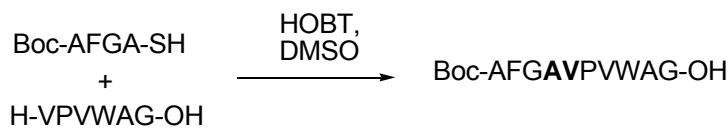

To an oven-dried vial were charged thioacid **26** (0.8 mg, 1.7  $\mu\text{mol}$ ), peptide **13** (1.0 mg, 1.6  $\mu\text{mol}$ ) and 4Å MS (2 mg). A stock solution of HOBT (4.5 mg in 500  $\mu\text{L}$  DMSO) 50  $\mu\text{L}$  was added to the vial. The solution was stirred at room temperature for 12 h and quenched by addition of 2 mL MeCN/H<sub>2</sub>O = 1/1. The quenched reaction mixture was subject to HPLC purification (30-45% MeCN/H<sub>2</sub>O over 30 min, Microsorb 100-5 C18 column, 16 mL/min, 225 nm) and lyophilization afforded peptide **27** (1.4 mg, 80%) as a white powder. HR-ESIMS ( $m/z$ ) Calcd for C<sub>53</sub>H<sub>75</sub>N<sub>11</sub>O<sub>13</sub>Na: [M+Na]<sup>+</sup>  $m/z$  = 1096.5444; Found: 1096.5450.

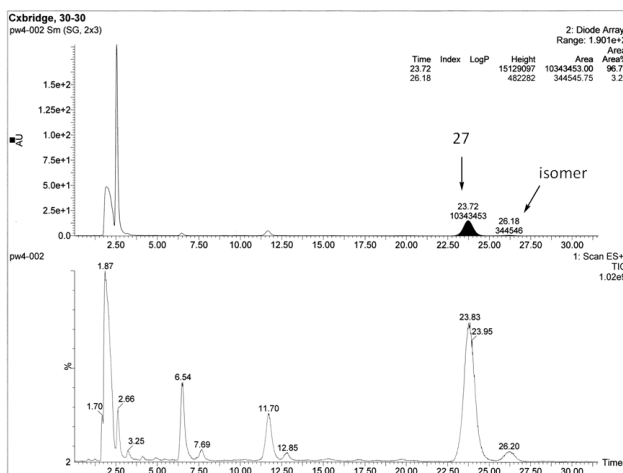

LC-MS traces of reaction mixture: gradient 30-30% CH<sub>3</sub>CN/H<sub>2</sub>O over 6 min at a flow rate of 0.2 mL/min, C18 column.

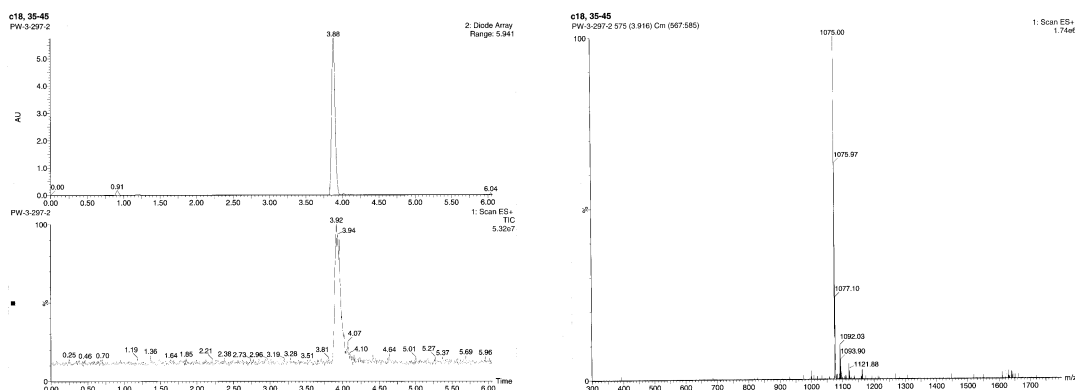

- a) UV and MS traces from UPLC-MS analysis of peptide **27**: gradient 35-45% CH<sub>3</sub>CN/H<sub>2</sub>O over 6 min at a flow rate of 0.3 mL/min, C18 column. (b) ESI-MS of compound. ESI calcd for C<sub>53</sub>H<sub>76</sub>N<sub>11</sub>O<sub>13</sub> [M+H]<sup>+</sup> *m/z* = 1074.55; found: 1075.00.

## 29

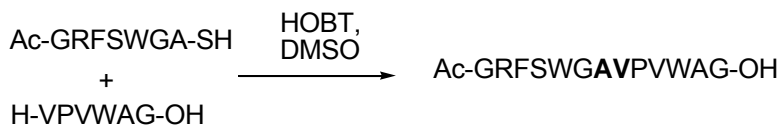

To an oven-dried vial were charged thioacid **28** (1.0 mg, 1.2 μmol), peptide **13** (0.7 mg, 1.1 μmol) and 4Å MS (2 mg). A stock solution of HOBT (3.2 mg in 400 uL DMSO) 40 μL was added to the vial. The solution was stirred at room temperature for 12 h and quenched by addition of 2 mL MeCN/H<sub>2</sub>O =1/1. The quenched reaction mixture was subject to HPLC purification (20-45% MeCN/H<sub>2</sub>O over 30 min, Microsorb 100-5 C4 column, 16 mL/min, 225 nm) and lyophilization afforded peptide **29** (1.3 mg, 81%) as a white powder.

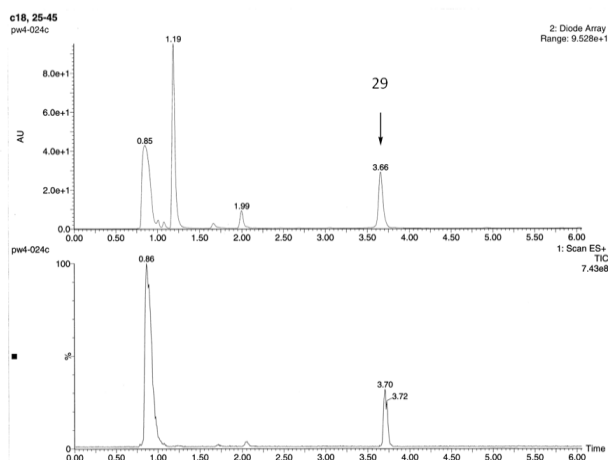

UPLC-MS traces of reaction mixture: gradient 25-45% CH<sub>3</sub>CN/H<sub>2</sub>O over 6 min at a flow rate of 0.3 mL/min, C18 column.

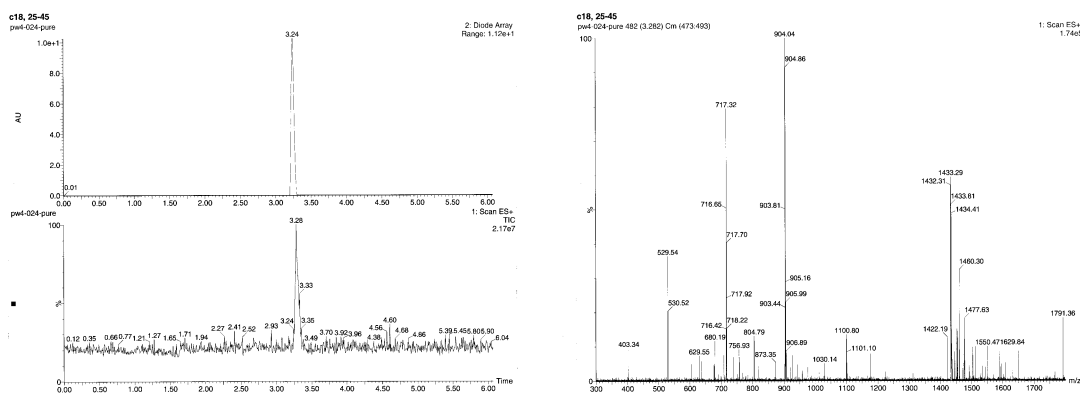

a) UV and MS traces from UPLC-MS analysis of peptide **29**: gradient 25-45% CH<sub>3</sub>CN/H<sub>2</sub>O over 6 min at a flow rate of 0.3 mL/min, C18 column. (b) ESI-MS of compound. ESI calcd for C<sub>69</sub>H<sub>95</sub>N<sub>18</sub>O<sub>16</sub> [M+H]<sup>+</sup>  $m/z$  = 1431.71, [M+2H]<sup>2+</sup>  $m/z$  = 716.36; found: 1432.31, 716.65.



### 30

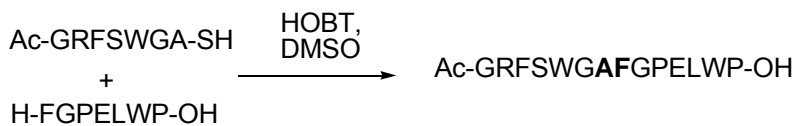

To an oven-dried vial were charged thioacid **28** (0.6 mg, 0.72  $\mu\text{mol}$ ), peptide **8** (0.5 mg, 0.60  $\mu\text{mol}$ ) and 4 $\text{\AA}$  MS (2 mg). A stock solution of HOBT (1.9 mg in 300  $\mu\text{L}$  DMSO) 30  $\mu\text{L}$  was added to the vial. The solution was stirred at room temperature for 12 h and quenched by addition of 2 mL MeCN/H<sub>2</sub>O =1/1. The quenched reaction mixture was subject to HPLC purification (20-45% MeCN/H<sub>2</sub>O over 30 min, Microsorb 100-5 C4 column, 16 mL/min, 225 nm) and lyophilization afforded peptide **30** (0.8, 82%) as a white powder.

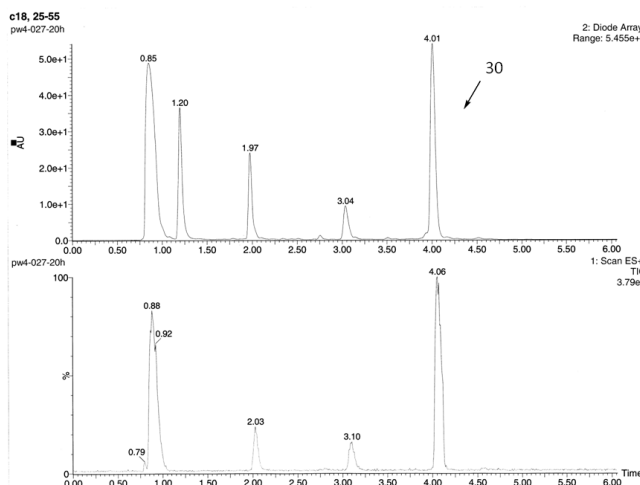

UPLC-MS traces of reaction mixture: gradient 25-55% CH<sub>3</sub>CN/H<sub>2</sub>O over 6 min at a flow rate of 0.3 mL/min, C18 column.

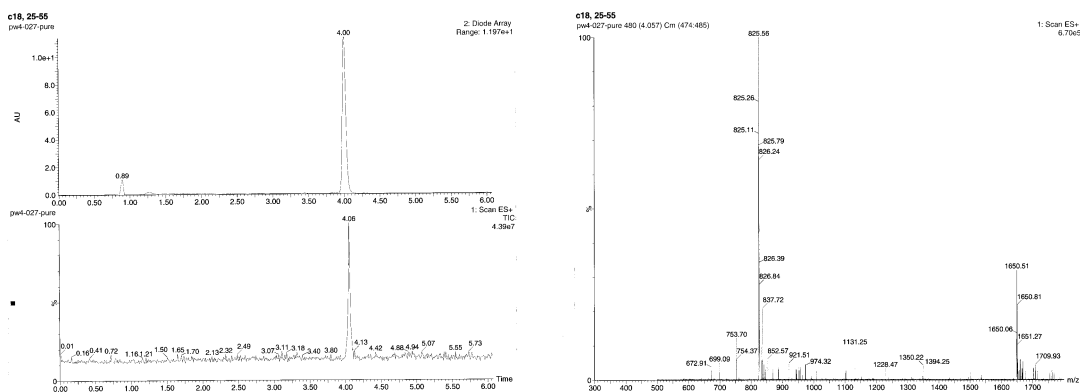

- a) UV and MS traces from UPLC-MS analysis of peptide **30**: gradient 25-45% CH<sub>3</sub>CN/H<sub>2</sub>O over 6 min at a flow rate of 0.3 mL/min, C18 column. (b) ESI-MS of compound. ESI calcd for C<sub>81</sub>H<sub>106</sub>N<sub>19</sub>O<sub>19</sub> [M+H]<sup>+</sup> *m/z* = 1648.78, [M+2H]<sup>2+</sup> *m/z* = 824.89; found: 825.11.

## 32

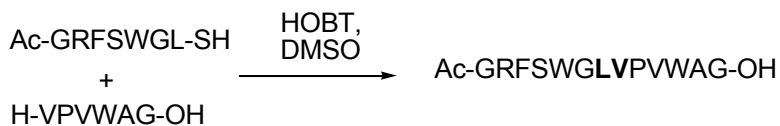

To an oven-dried vial were charged thioacid **31** (0.9 mg, 1.0 μmol), peptide **13** (0.7 mg, 1.1 μmol) and 4Å MS (2 mg). A stock solution of HOBT (2.8 mg in 400 uL DMSO) 40 μL was added to the vial. The solution was stirred at room temperature for 12 h and quenched by addition of 2 mL MeCN/H<sub>2</sub>O =1/1. The quenched reaction mixture was subject to HPLC purification (25-40% MeCN/H<sub>2</sub>O over 30 min, Microsorb 100-5 C18 column, 16 mL/min, 225 nm) and lyophilization afforded peptide **32** (1.2 mg, 80%) as a white powder.

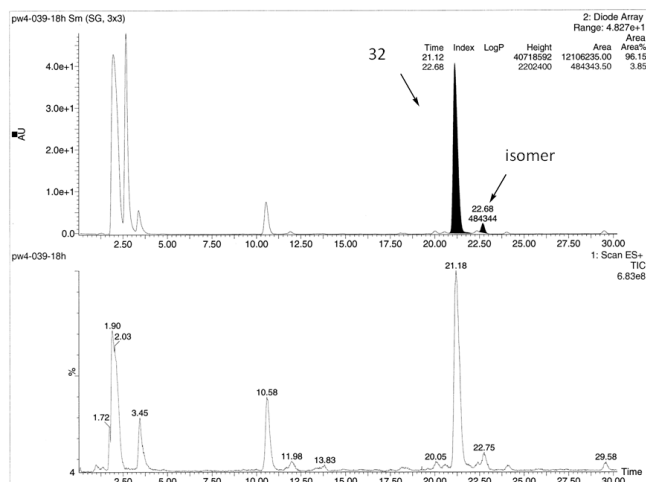

LC-MS traces of reaction mixture: gradient 30-50% CH<sub>3</sub>CN/H<sub>2</sub>O over 30 min at a flow rate of 0.2 mL/min, C18 column.

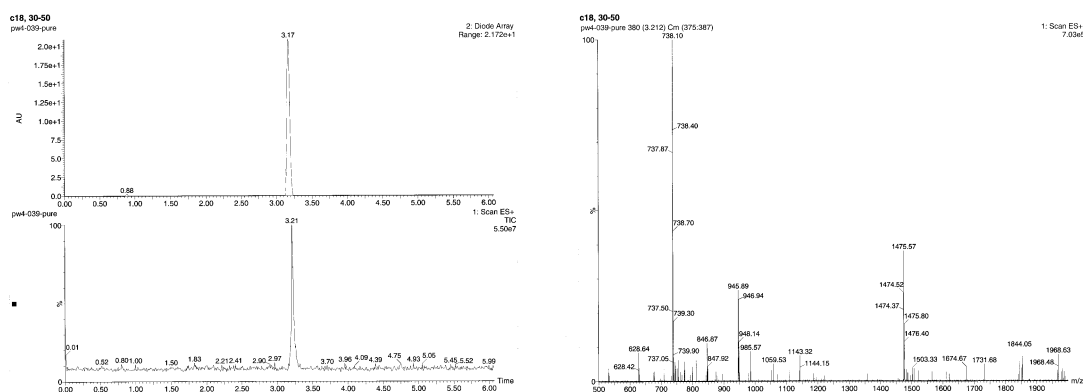

- a) UV and MS traces from UPLC-MS analysis of peptide **32**: gradient 20-45% CH<sub>3</sub>CN/H<sub>2</sub>O over 6 min at a flow rate of 0.3 mL/min, C8 column. (b) ESI-MS of compound. ESI calcd for C<sub>72</sub>H<sub>101</sub>N<sub>18</sub>O<sub>18</sub> [M+H]<sup>+</sup>  $m/z = 1473.76$ , [M+2H]<sup>2+</sup>  $m/z = 737.38$ ; found: 1474.37, 737.50.

48

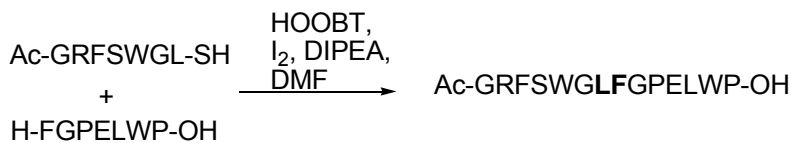

To an oven-dried vial were charged thioacid **31** (1.0 mg, 1.1  $\mu\text{mol}$ ), amine **8** (0.8 mg, 0.95  $\mu\text{mol}$ ) and 4Å MS (2 mg). A stock solution of DIPEA/HOBT (3  $\mu\text{L}$  DIPEA/4 mg HOBT in 200  $\mu\text{L}$  DMF) 20  $\mu\text{L}$  and I<sub>2</sub> (16 mg in 1.5 mL DMF) 15  $\mu\text{L}$  was added to the vial. The solution was stirred at room temperature for 30 min and quenched by addition of 2 mL MeCN/H<sub>2</sub>O =1/1. The quenched reaction mixture was subject to HPLC purification (25-45% MeCN/H<sub>2</sub>O over 30 min, Microsorb 100-5 Xbridge C18 column, 16 mL/min, 230 nm) and lyophilization afforded peptide **48** (as a white powder (1.4 mg, 82%).

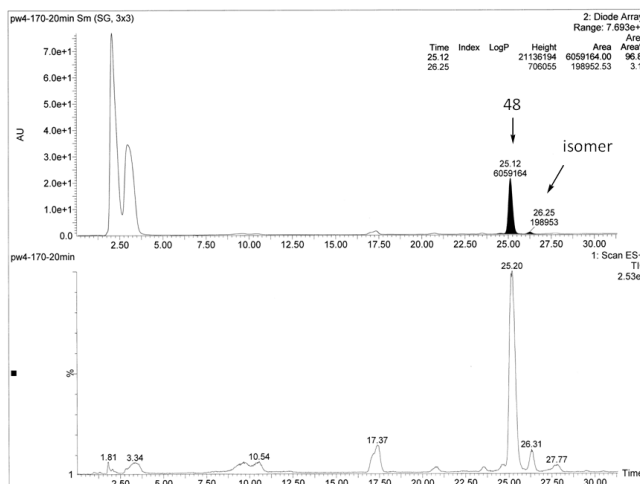

LC-MS traces of reaction mixture: gradient 25-45% CH<sub>3</sub>CN/H<sub>2</sub>O over 30 min at a flow rate of 0.2 mL/min, Xbridge C18 column.

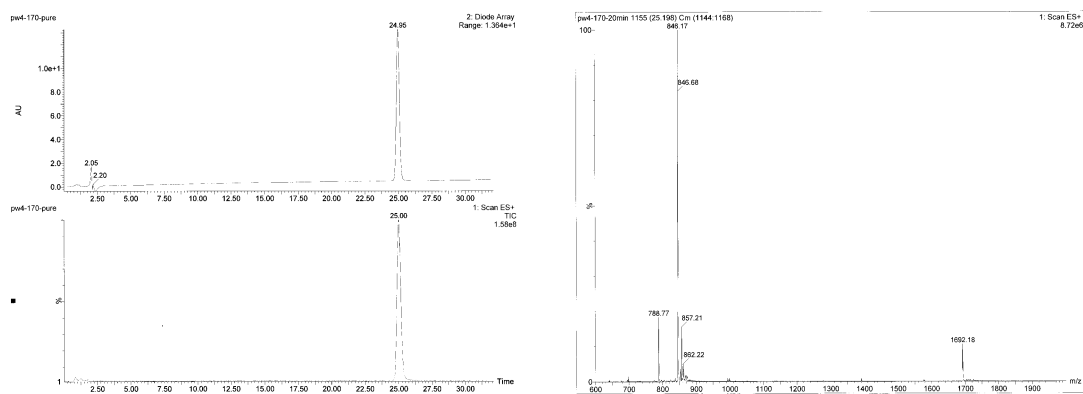

- a) UV and MS traces from UPLC-MS analysis of peptide **48**: gradient 25-45% CH<sub>3</sub>CN/H<sub>2</sub>O over 30 min at a flow rate of 0.2 mL/min, Xbridge C18 column. (b) ESI-MS of compound. ESI calcd for C<sub>84</sub>H<sub>112</sub>N<sub>19</sub>O<sub>19</sub> [M+H]<sup>+</sup>  $m/z$  = 1690.83, [M+2H]<sup>2+</sup>  $m/z$  = 845.9; found: 846.17.

## 34

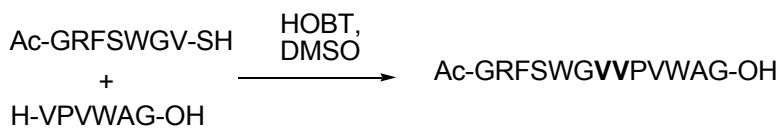

To an oven-dried vial were charged thioacid **33** (1.1 mg, 1.3  $\mu\text{mol}$ ), peptide **13** (0.6 mg, 0.96  $\mu\text{mol}$ ) and 4Å MS (2 mg). A stock solution of HOBT (3.4 mg in 400  $\mu\text{L}$  DMSO) 40  $\mu\text{L}$  was added to the vial. The solution was stirred at room temperature for 12 h and quenched by addition of 2 mL MeCN/H<sub>2</sub>O =1/1. The quenched reaction mixture was subject to HPLC purification (20-45% MeCN/H<sub>2</sub>O over 30 min, Microsorb 100-5 C4 column, 16 mL/min, 225 nm) and lyophilization, afforded peptide **34** (1.0 mg, 72%) as a white powder.

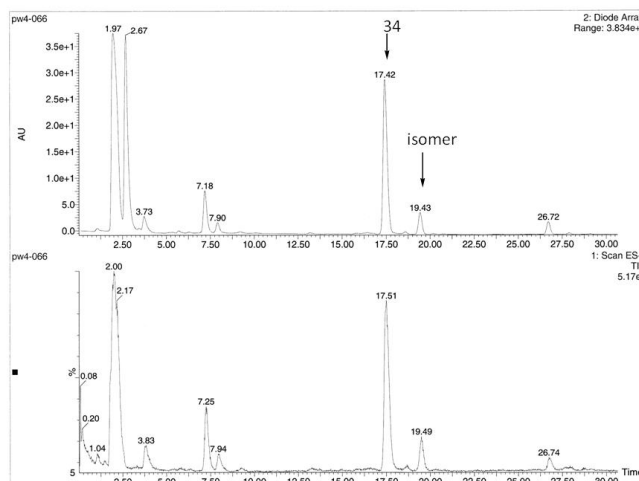

UPLC-MS traces of reaction mixture: gradient 30-50% CH<sub>3</sub>CN/H<sub>2</sub>O over 30 min at a flow rate of 0.2 mL/min, C18 column.

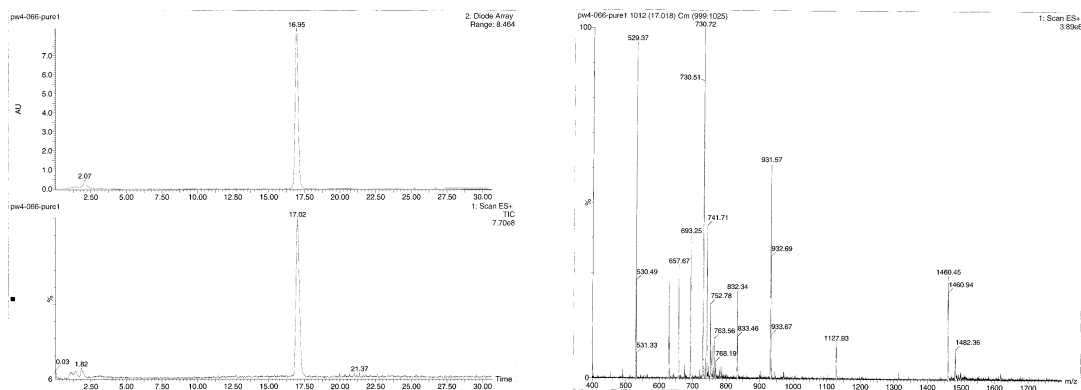

- a) UV and MS traces from UPLC-MS analysis of peptide **34**: gradient 20-45% CH<sub>3</sub>CN/H<sub>2</sub>O over 6 min at a flow rate of 0.3 mL/min, C18 column. (b) ESI-MS of compound. ESI calcd for C<sub>71</sub>H<sub>99</sub>N<sub>18</sub>O<sub>16</sub> [M+H]<sup>+</sup> *m/z* = 1459.74, [M+2H]<sup>2+</sup> *m/z* = 730.37; found: 1460.33, 730.51.

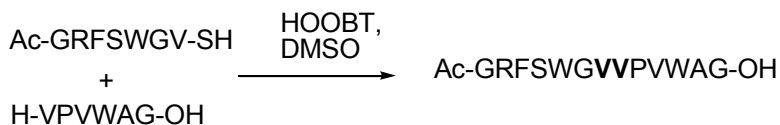

To an oven-dried vial were charged thioacid **33** (0.7 mg, 0.81 μmol), peptide **13** (0.4 mg, 0.64 μmol) and 4Å MS (2 mg). A stock solution of HOBT (3.0 mg in 300 μL DMSO) 30 μL was added to the vial. The solution was stirred at room temperature for 6 h and quenched by addition of 2 mL MeCN/H<sub>2</sub>O = 1/1. The quenched reaction mixture was subject to HPLC purification (20-45% MeCN/H<sub>2</sub>O over 30 min, Microsorb 100-5 C4 column, 16 mL/min, 225 nm) and lyophilization, afforded peptide **34** (0.8 mg, 86%) as a white powder.

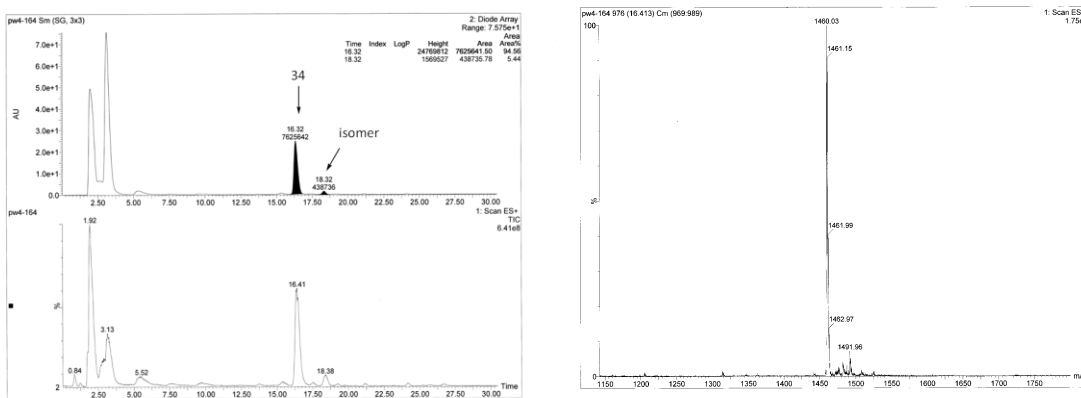

- a) UV and MS traces from UPLC-MS analysis of peptide **34**: gradient 20-45% CH<sub>3</sub>CN/H<sub>2</sub>O over 6 min at a flow rate of 0.3 mL/min, C18 column. (b) ESI-MS of compound. ESI calcd for C<sub>71</sub>H<sub>99</sub>N<sub>18</sub>O<sub>16</sub> [M+H]<sup>+</sup> *m/z* = 1459.74, [M+2H]<sup>2+</sup> *m/z* = 730.37; found: 1460.03.

### 36

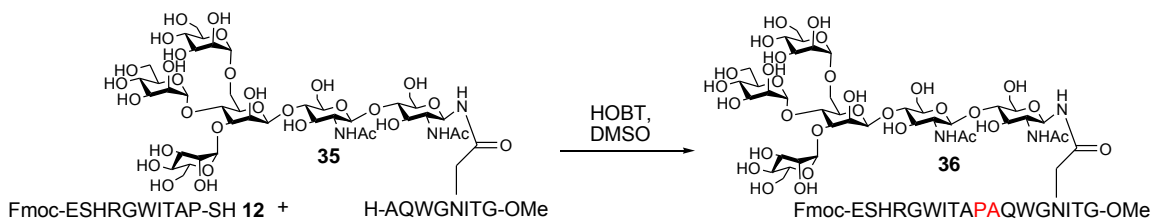

To an oven-dried vial were charged thioacid **12** (0.7 mg, 0.50 μmol), glycopeptide **35** (0.8 mg, 0.42 μmol) and 4 Å MS (2 mg). A stock solution of HOBT (1.4 mg in 300 μL DMSO) 30 μL was added to the vial. The solution was stirred at room temperature for 12 h and quenched by addition of 2 mL MeCN/H<sub>2</sub>O = 1/3. The quenched reaction mixture was subject to HPLC purification (25-35% MeCN/H<sub>2</sub>O over 30 min, Microsorb 100-5 C18 column, 16 mL/min, 265 nm) and lyophilization afforded glycopeptide **36** (1.1 mg, 80%) as a white powder.

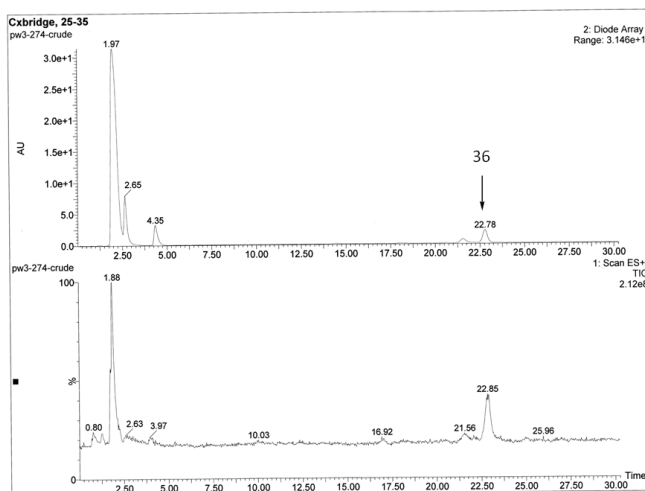

UPLC-MS traces of reaction mixture: gradient 25-35% CH<sub>3</sub>CN/H<sub>2</sub>O over 30 min at a flow rate of 0.2 mL/min, C18 column.



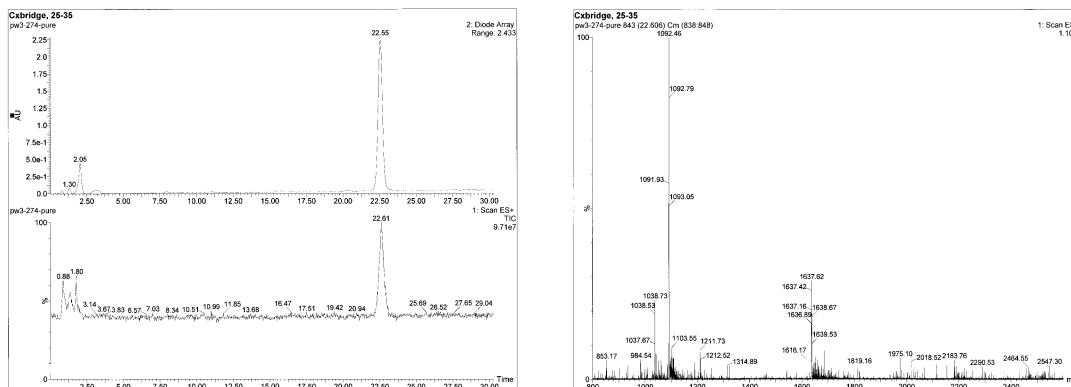

a) UV and MS traces from UPLC-MS analysis of glycopeptide **36**: gradient 20-35% CH<sub>3</sub>CN/H<sub>2</sub>O over 6 min at a flow rate of 0.3 mL/min, C8 column. (b) ESI-MS of compound. ESI calcd for C<sub>144</sub>H<sub>208</sub>N<sub>29</sub>O<sub>58</sub> [M+H]<sup>+</sup>  $m/z = 3271.41$ , [M+2H]<sup>2+</sup>  $m/z = 1636.2$ , [M+3H]<sup>3+</sup>  $m/z = 1091.14$ ; found: 1636.89, 1091.93.

**39**

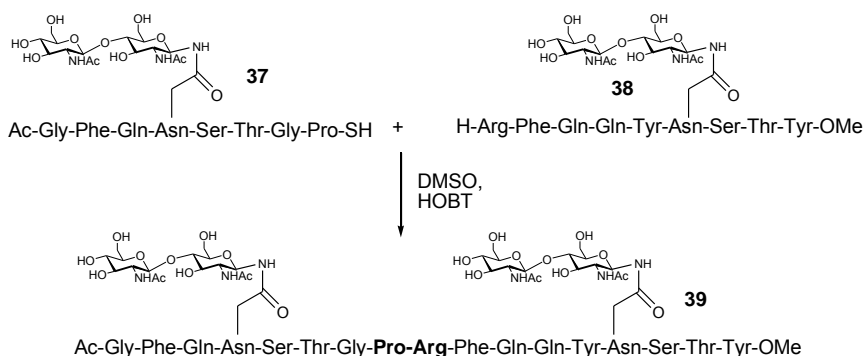

To an oven-dried vial were charged thioacid **37** (0.7 mg, 0.55 μmol), peptide **38** (0.7 mg, 0.43 μmol) and 4Å MS (2 mg). A stock solution of HOBT (1.5 mg in 250 uL DMSO) 25 μL was added to the vial. The solution was stirred at room temperature for 12 h and quenched by addition of 2 mL MeCN/H<sub>2</sub>O = 1/1. The quenched reaction mixture was subject to HPLC purification (20-45% MeCN/H<sub>2</sub>O over 30 min, Microsorb 100-5 C4 column, 16 mL/min, 225 nm) and lyophilization afforded glycopeptide **39** (1.0 mg, 81%) as a white powder.

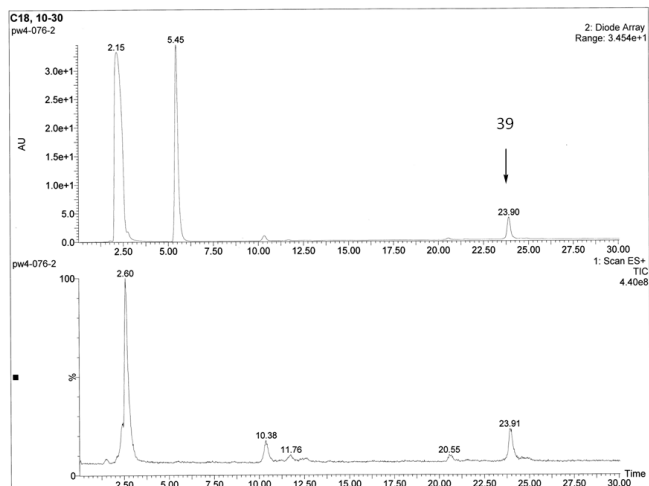

LC-MS traces of reaction mixture: gradient 10-30% CH<sub>3</sub>CN/H<sub>2</sub>O over 30 min at a flow rate of 0.2 mL/min, C18 column.

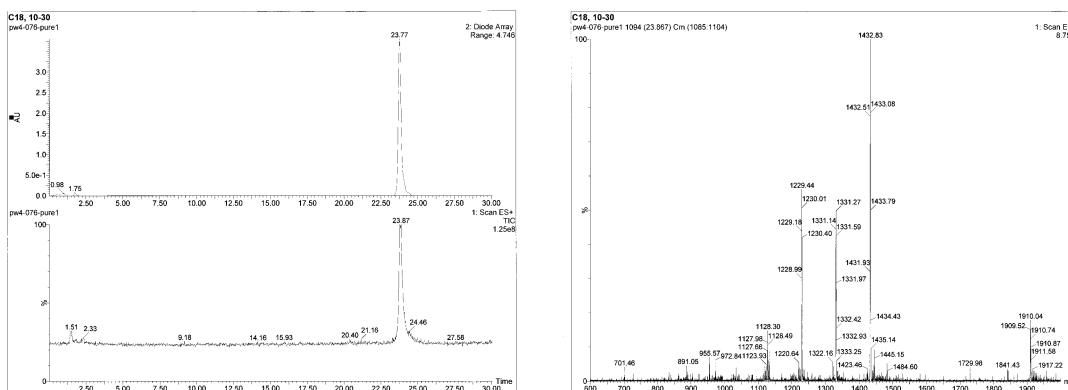

a) UV and MS traces from UPLC-MS analysis of glycopeptide **39**: gradient 10-30% CH<sub>3</sub>CN/H<sub>2</sub>O over 30 min at a flow rate of 0.3 mL/min, C18 column. (b) ESI-MS of compound. ESI calcd for C<sub>123</sub>H<sub>180</sub>N<sub>29</sub>O<sub>50</sub> [M+H]<sup>+</sup> *m/z* = 2863.24, [M+2H]<sup>2+</sup> *m/z* = 1432.12; found: 1432.51.

**42**

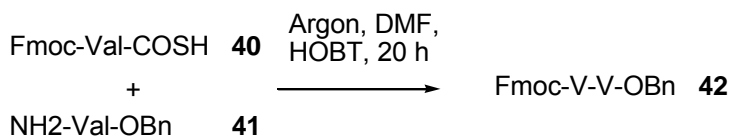

To an oven-dried vial were charged thioacid **40** (140 mg, 0.39 mmol), amine NH<sub>2</sub>-Val-OBn (80 mg, 0.39 mmol) and 4 Å MS (50 mg), the mixture was degassed with Argon

carefully. A stock solution of HOBT (53 mg in 500  $\mu$ L DMF, degassed with Argon) was added to the vial. The reaction was run in glove box at an atmosphere of nitrogen. The solution was stirred at room temperature for 20 h. The reaction mixture was subject to a silica gel column and eluted with hexanes/ethyl acetate (4:1-2:1) to give peptide **42** (85 mg, 41%) as a white powder.  $^1\text{H}$  NMR (600 MHz,  $\text{CDCl}_3$ ):  $\delta$  7.63-7.62 (m, 2 H), 7.50-7.46 (m, 2 H), 7.26-7.16 (m, 9 H), 6.78 (d, 1 H,  $J = 8.5$  Hz), 5.63 (d, 1 H,  $J = 9.0$  Hz), 5.05 (d, 1 H,  $J = 12.2$  Hz), 4.95 (d, 1 H,  $J = 12.2$  Hz), 4.53-4.51 (m, 1 H), 4.34-4.32 (m, 1 H), 4.23-4.21 (m, 1 H), 4.11-4.07 (m, 2 H), 2.07-2.04 (m, 1 H), 1.99-1.96 (m, 1 H), 0.85-0.82 (m, 6 H), 0.77 (d, 3 H,  $J = 6.8$  Hz), 0.71 (d, 3 H,  $J = 6.6$  Hz);  $^{13}\text{C}$  NMR (150 MHz,  $\text{CDCl}_3$ ):  $\delta$  171.7, 171.6, 156.5, 143.9, 143.8, 141.3, 135.4, 128.6, 128.5, 128.47, 128.41, 127.7, 127.1, 125.2, 125.1, 120.0, 119.9, 67.2, 67.0, 60.3, 57.2, 47.2, 31.4, 31.2, 19.2, 19.0, 18.2, 17.7; ESIMS ( $m/z$ ) Calcd for  $\text{C}_{32}\text{H}_{37}\text{N}_2\text{O}_5$ :  $[\text{M}+\text{H}]^+$   $m/z = 529.26$ ; Found: 529.58.

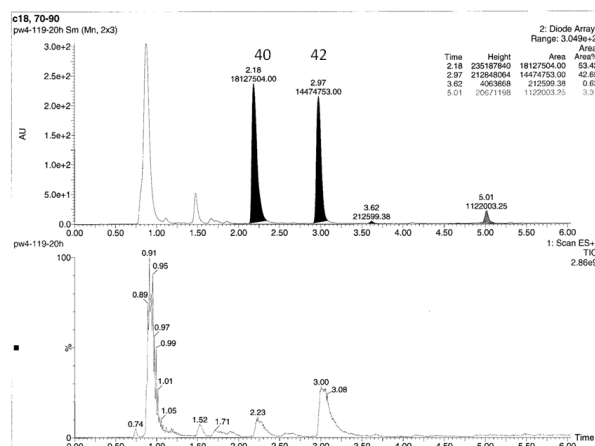

UPLC-MS traces of reaction mixture at 20 h: gradient 70-90%  $\text{CH}_3\text{CN}/\text{H}_2\text{O}$  over 6 min at a flow rate of 0.3 mL/min, C18 column.

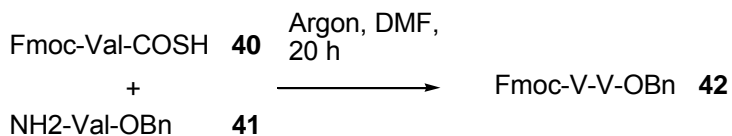

To an oven-dried vial were charged thioacid **40** (140 mg, 0.39 mmol), amine  $\text{NH}_2\text{-Val-OBn}$  (80 mg, 0.39 mmol) and 4Å MS (50 mg), the mixture was degassed with Argon carefully. A solution of DMF (500  $\mu$ L, degassed with Argon) was added to the vial. The

reaction was run in glove box at an atmosphere of nitrogen. The solution was stirred at room temperature for 20 h.

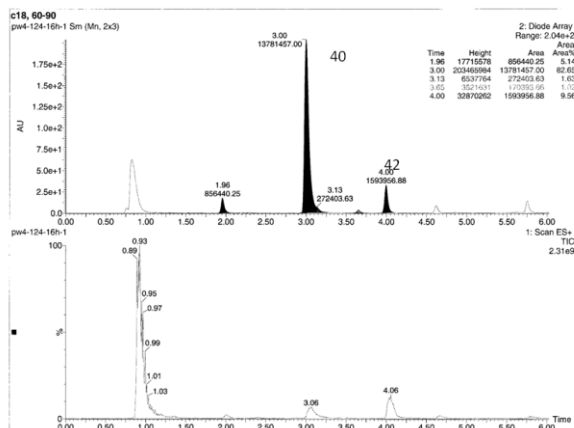

UPLC-MS traces of reaction mixture at 20 h: gradient 60-90% CH<sub>3</sub>CN/H<sub>2</sub>O over 6 min at a flow rate of 0.3 mL/min, C18 column.

#### 45

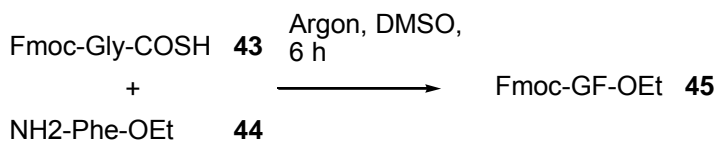

To an oven-dried vial were charged thioacid **43** (200 mg, 0.64 mmol), amine NH<sub>2</sub>-Val-OBn (123 mg, 0.64 mmol) and 4Å MS (50 mg), the mixture was degassed with Argon carefully. 1.6 mL DMF (degassed with Argon) was added to the vial. The reaction was run in glove box at an atmosphere of nitrogen for 6 h. The reaction mixture was subject to a silica gel column and eluted with hexanes/ethyl acetate (4:1-2:1) to give peptide **45** (81 mg, 27%) as a white powder. <sup>1</sup>H NMR (600 MHz, CDCl<sub>3</sub>): δ 7.80 (d, 2 H, *J* = 7.6 Hz), 7.62 (d, 2 H, *J* = 7.2 Hz), 7.42-7.41 (m, 2 H), 7.34-7.31 (m, 2 H), 7.25-7.13 (m, 7 H), 6.94 (d, 1 H, *J* = 7.6 Hz), 5.87 (t, 1 H, *J* = 5.2 Hz), 4.94-4.90 (m, 1 H), 4.42-4.39 (m, 2 H), 4.25-4.22 (m, 1 H), 4.19-4.16 (m, 2 H), 3.93-3.91 (m, 2 H), 3.18-3.10 (m, 2 H), 1.25 (t, 3 H, *J* = 7.2 Hz); <sup>13</sup>C NMR (150 MHz, CDCl<sub>3</sub>): δ 171.4, 168.9, 156.7, 143.9, 143.8, 141.32, 143.31, 135.8, 129.3, 128.6, 127.8, 127.1, 125.2, 125.1, 120.0, 67.3, 61.6, 53.5, 53.4, 47.1, 44.4, 38.0, 14.1; ESIMS (*m/z*) Calcd for C<sub>28</sub>H<sub>29</sub>N<sub>2</sub>O<sub>5</sub>: [M+H]<sup>+</sup> *m/z* = 473.20; Found: 473.45.

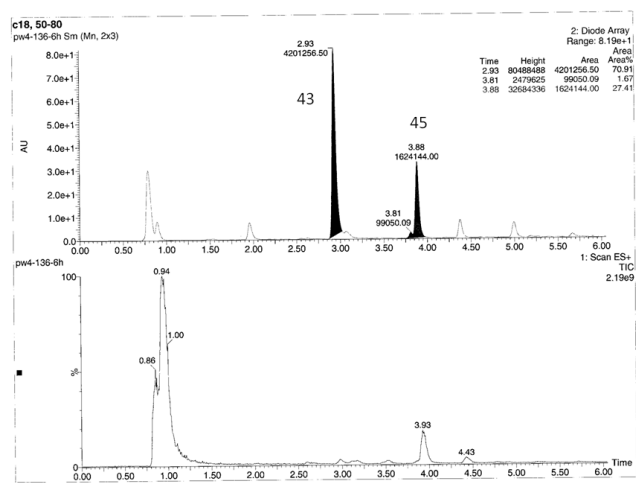

UPLC-MS traces of reaction mixture at 6 h: gradient 50-80%  $\text{CH}_3\text{CN}/\text{H}_2\text{O}$  over 6 min at a flow rate of 0.3 mL/min, C18 column. The conversion of **45** is 28%.

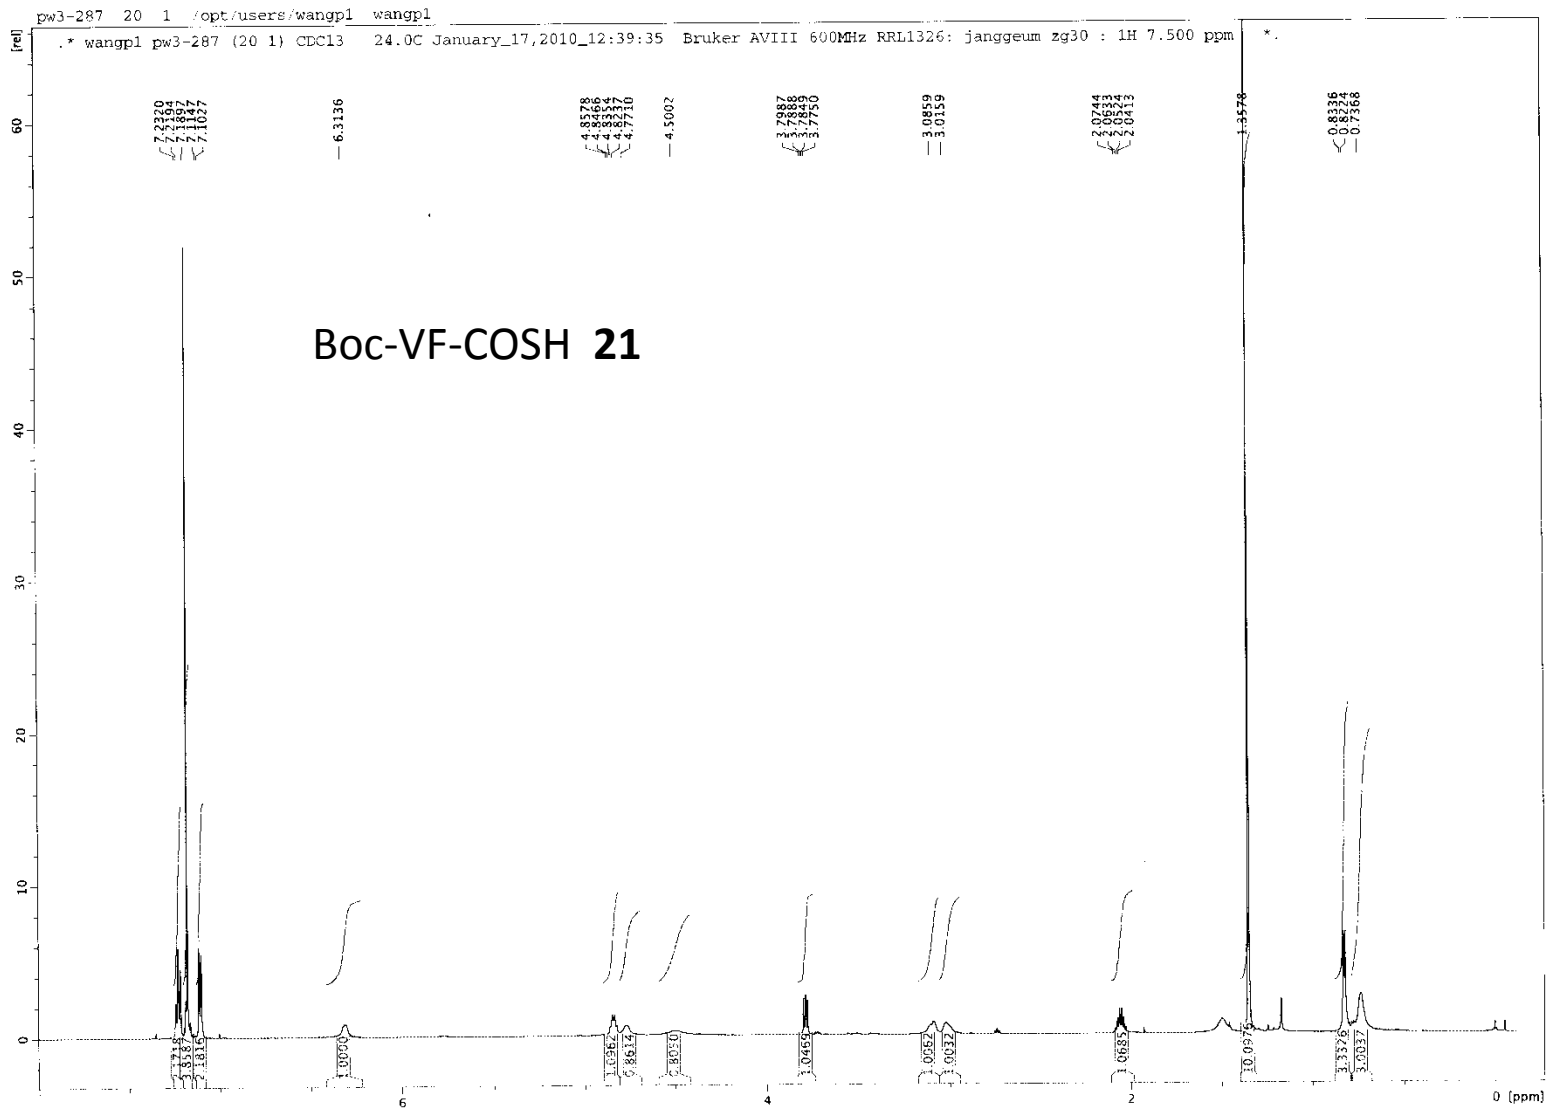

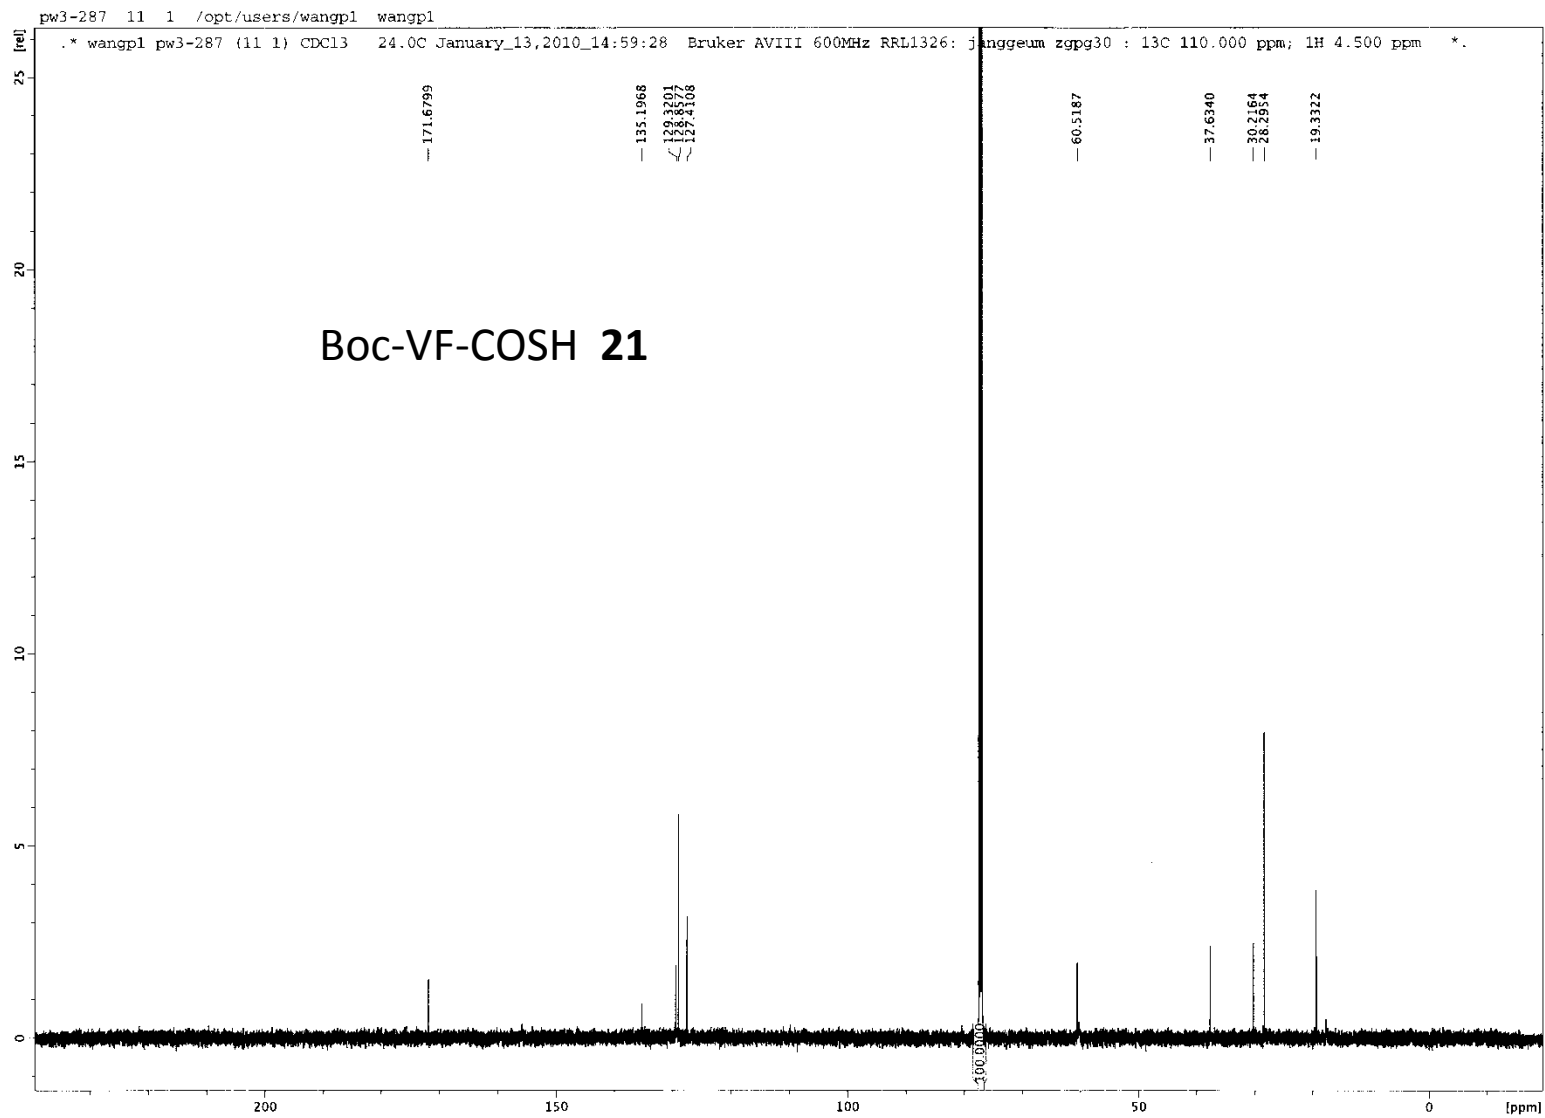

pw3-287 21 1 /opt/users/wangpl wangpl

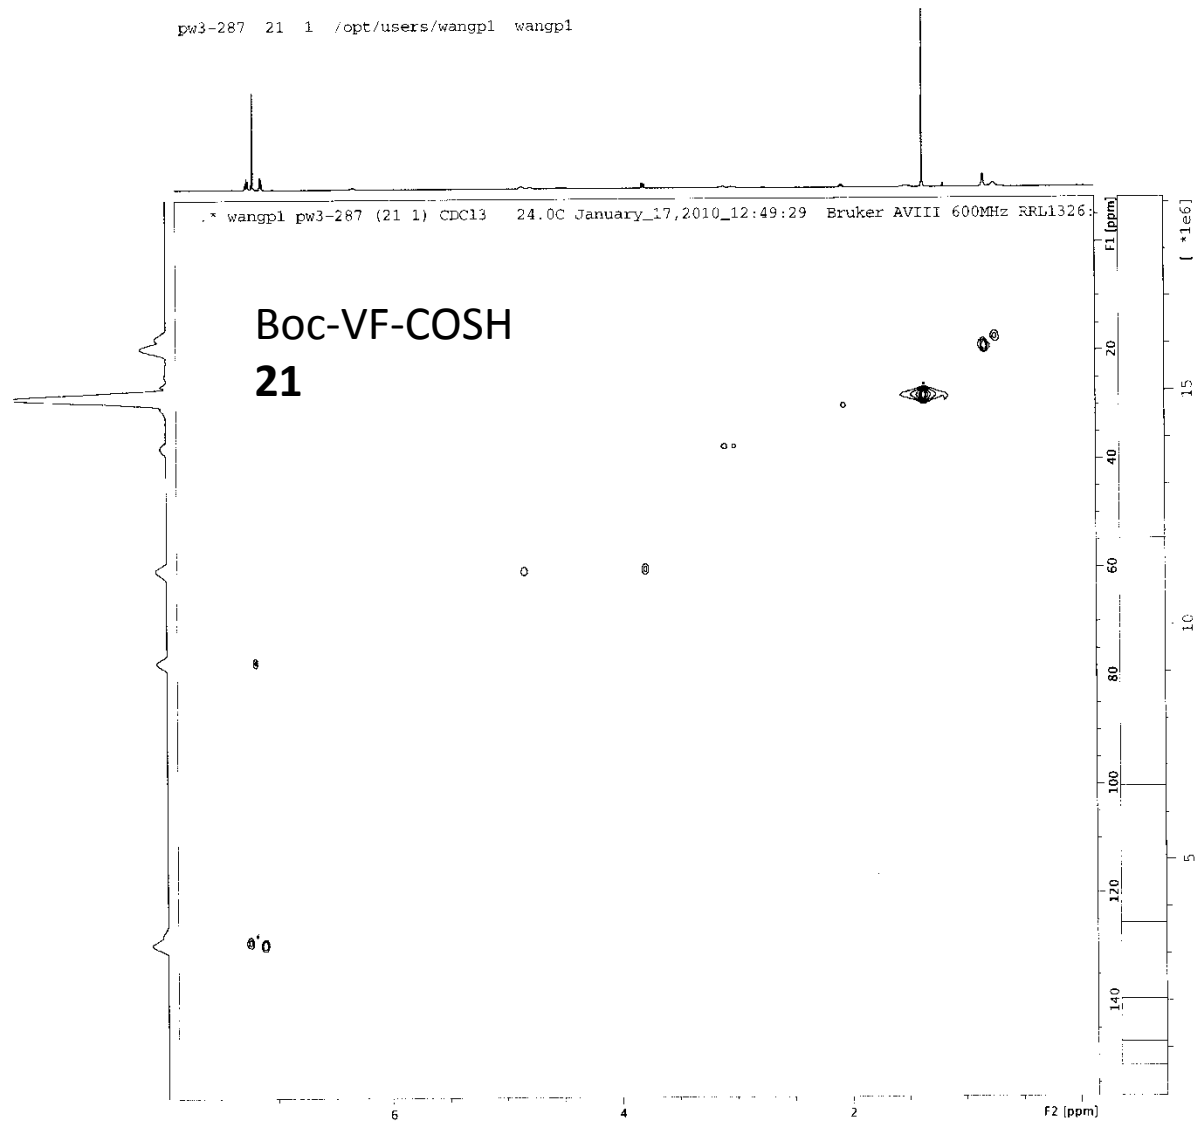



pw3-290 10 1 /opt/users/wangpl wangpl

\* wangpl pw3-290 (10 1) CDCl3 24.0C January\_14,2010\_14:11:12 Bruker AVIII 600MHz RRL1326: janggeum zg30 : 1H 7.500 ppm

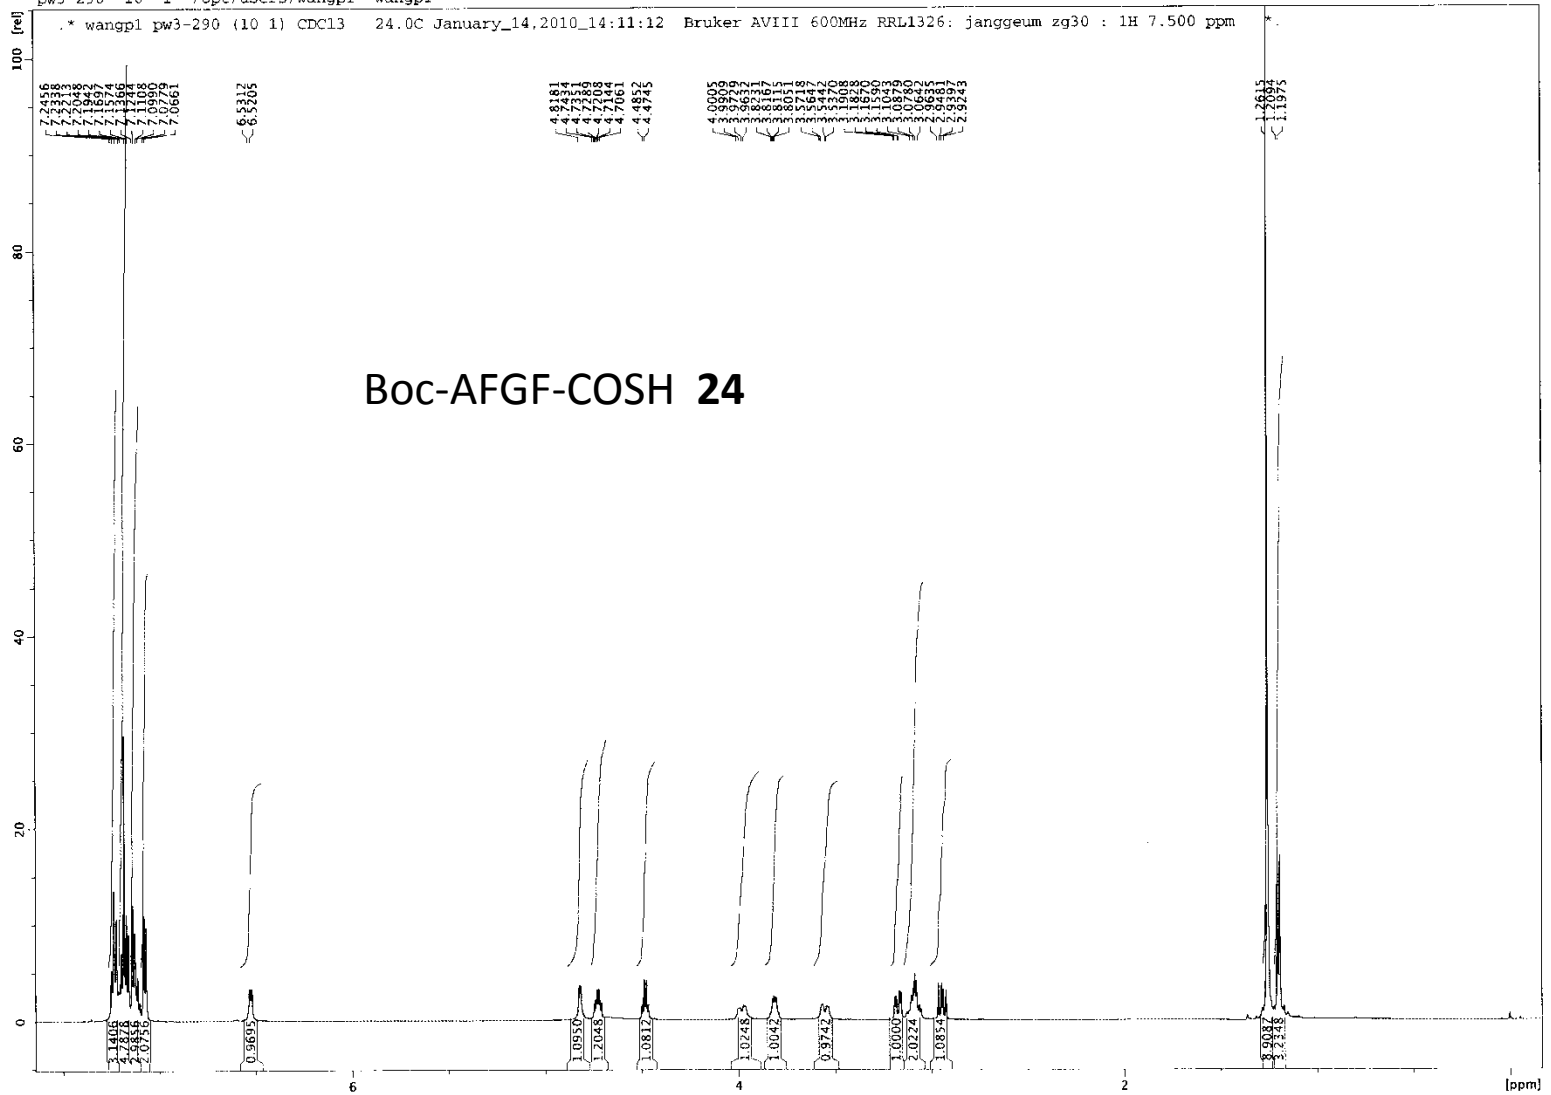

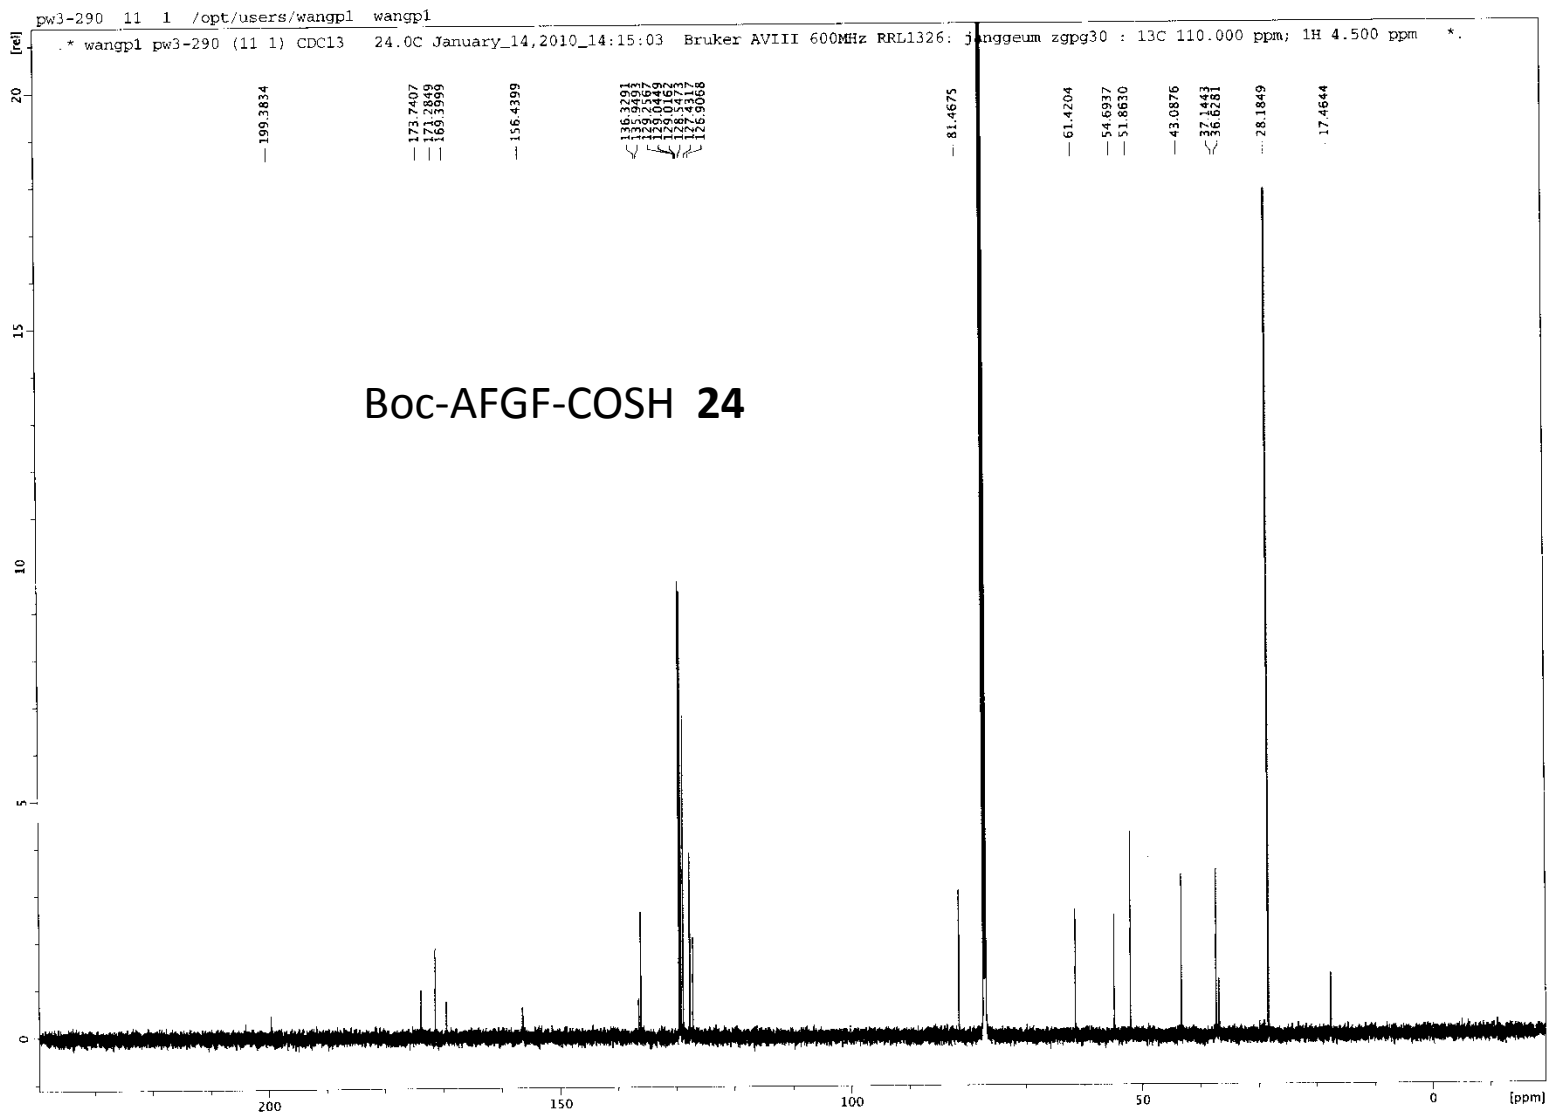

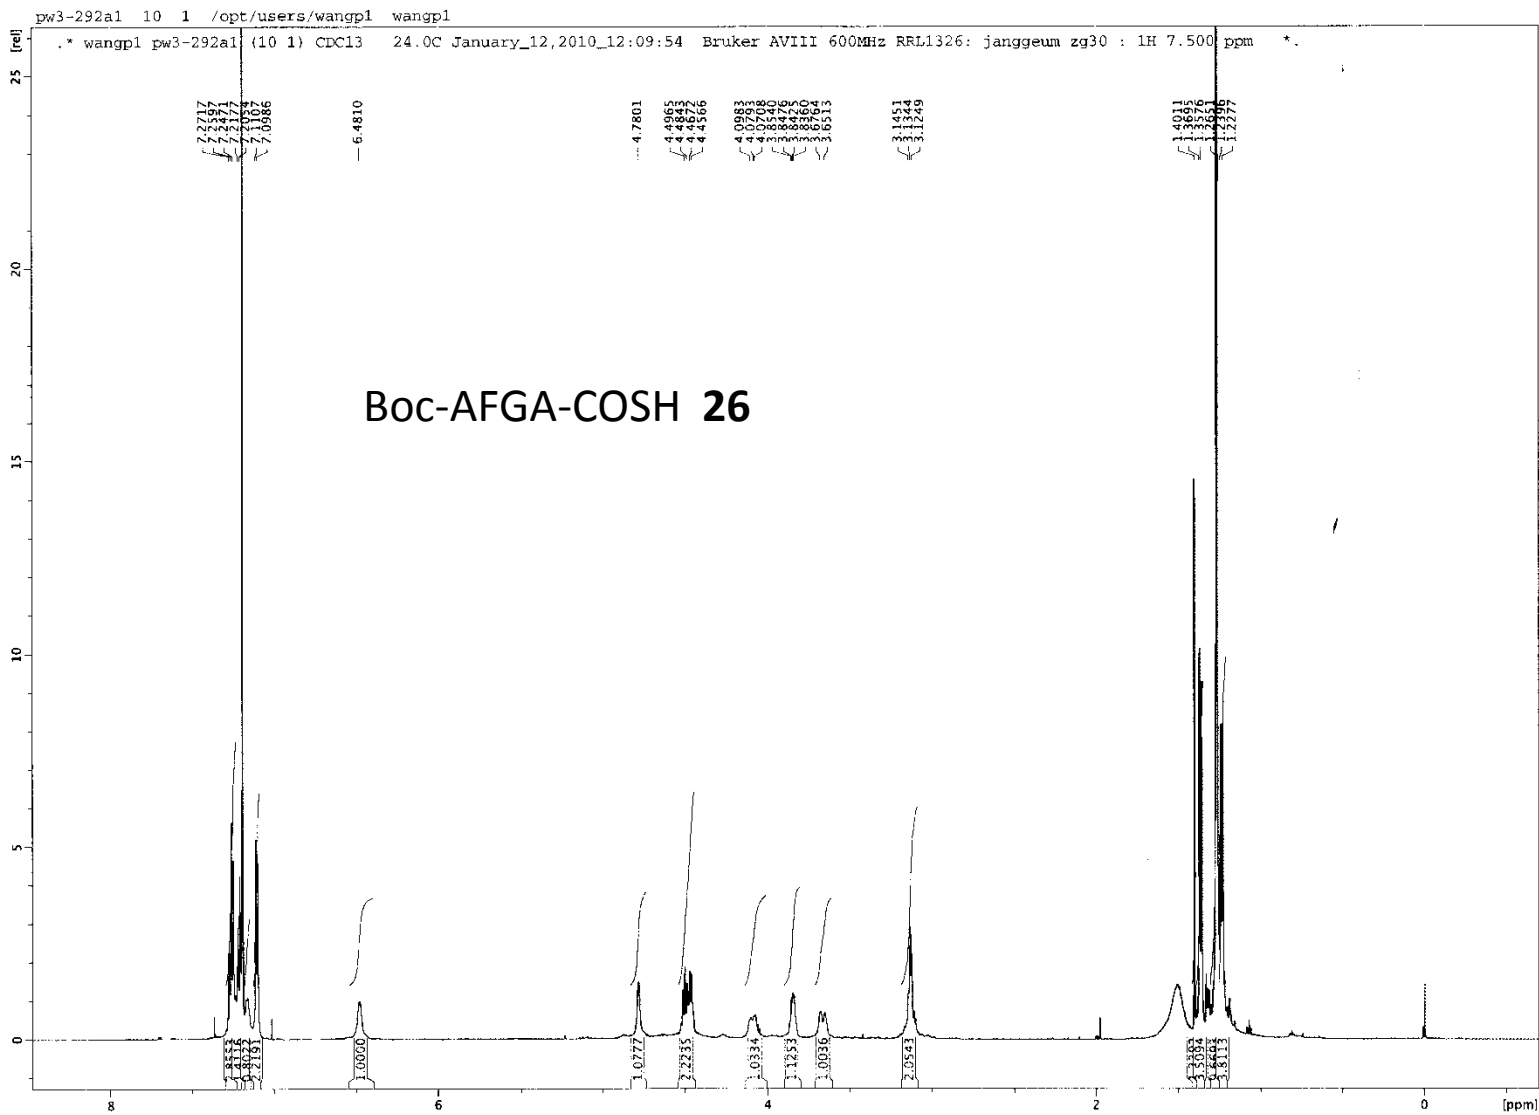

pw3-292ahsqc 11 1 /opt/users/wangpl wangpl

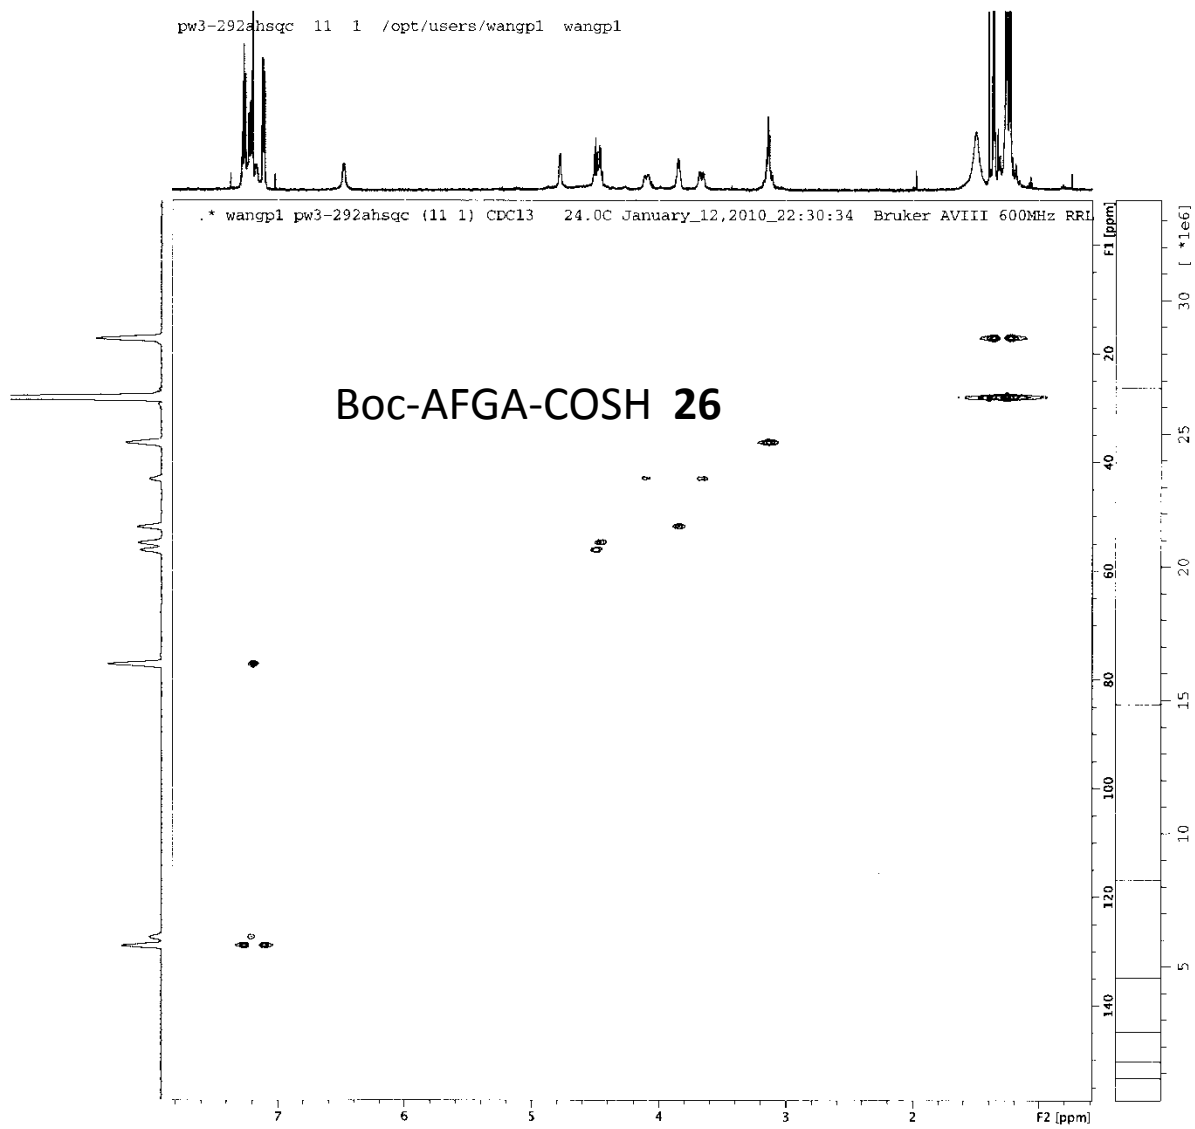

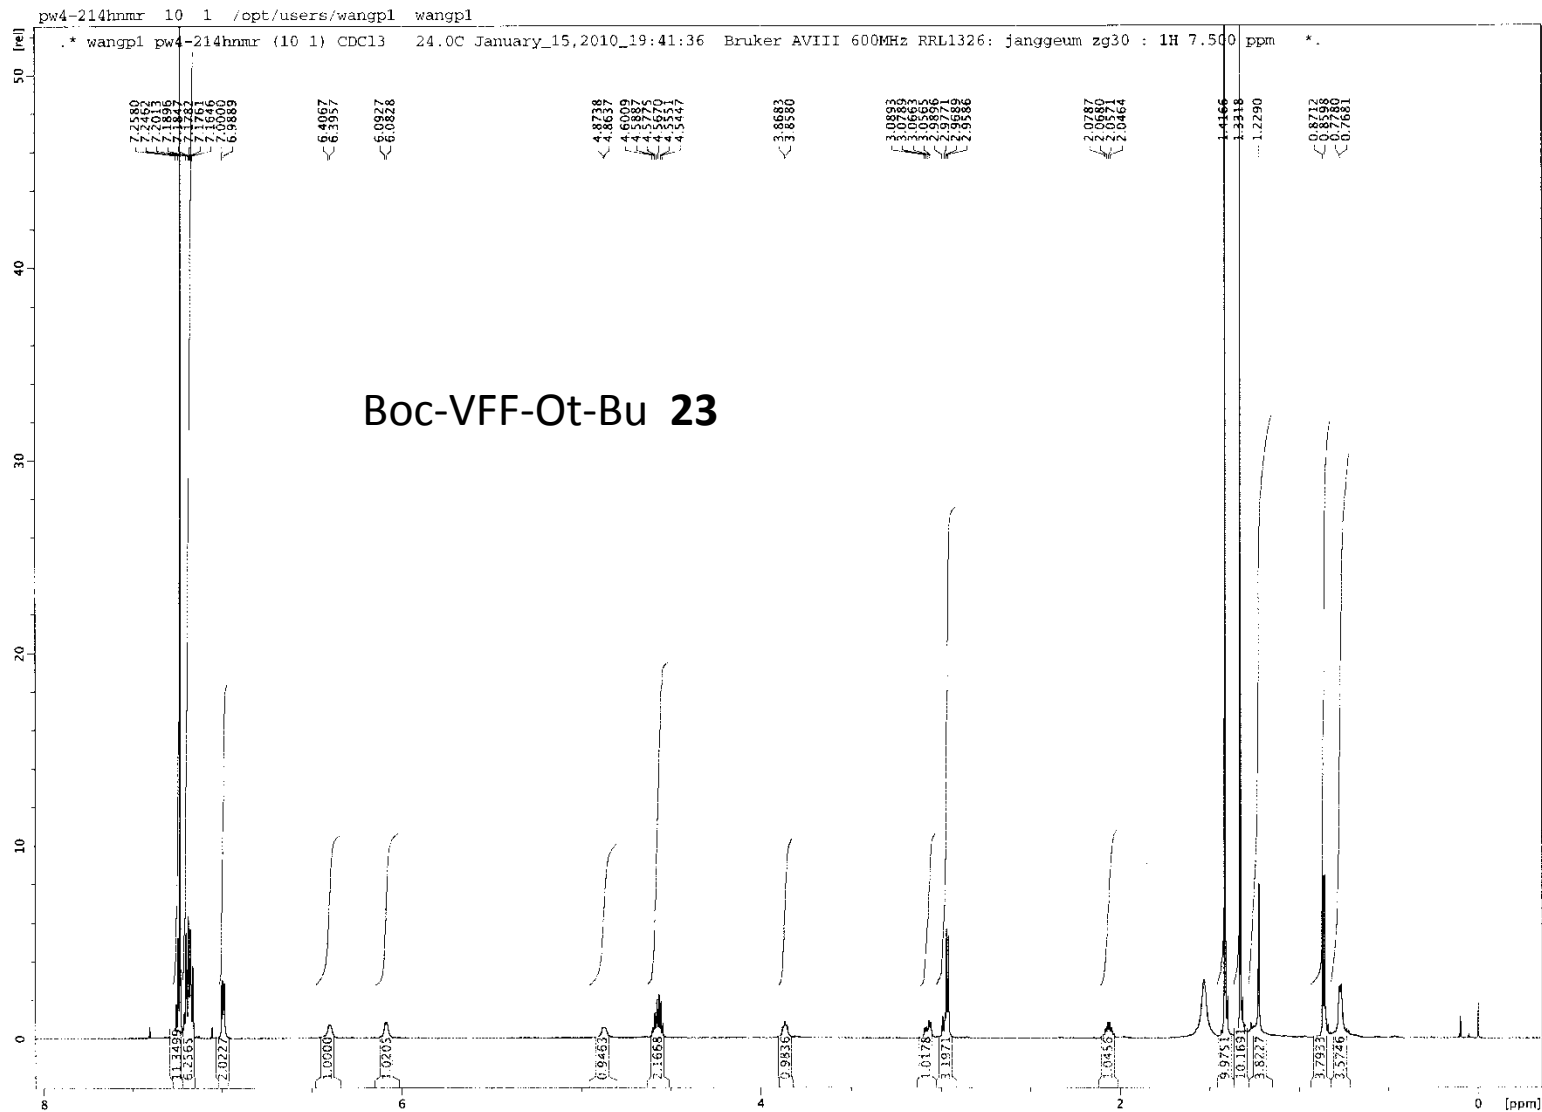

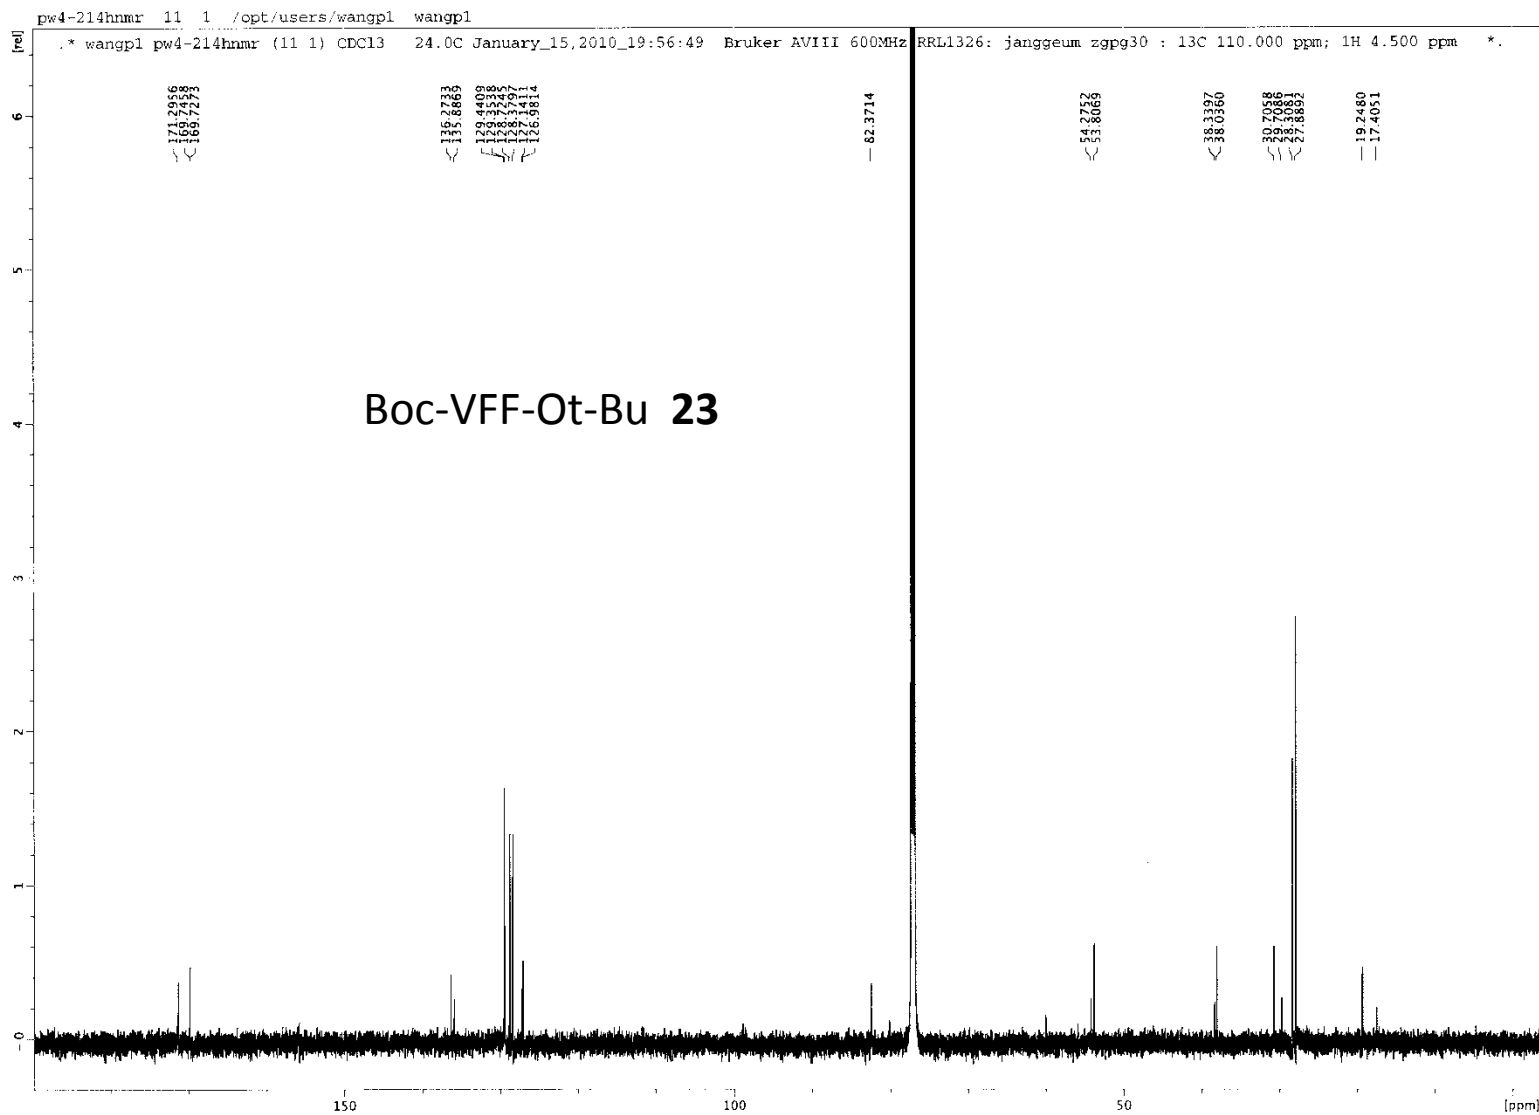

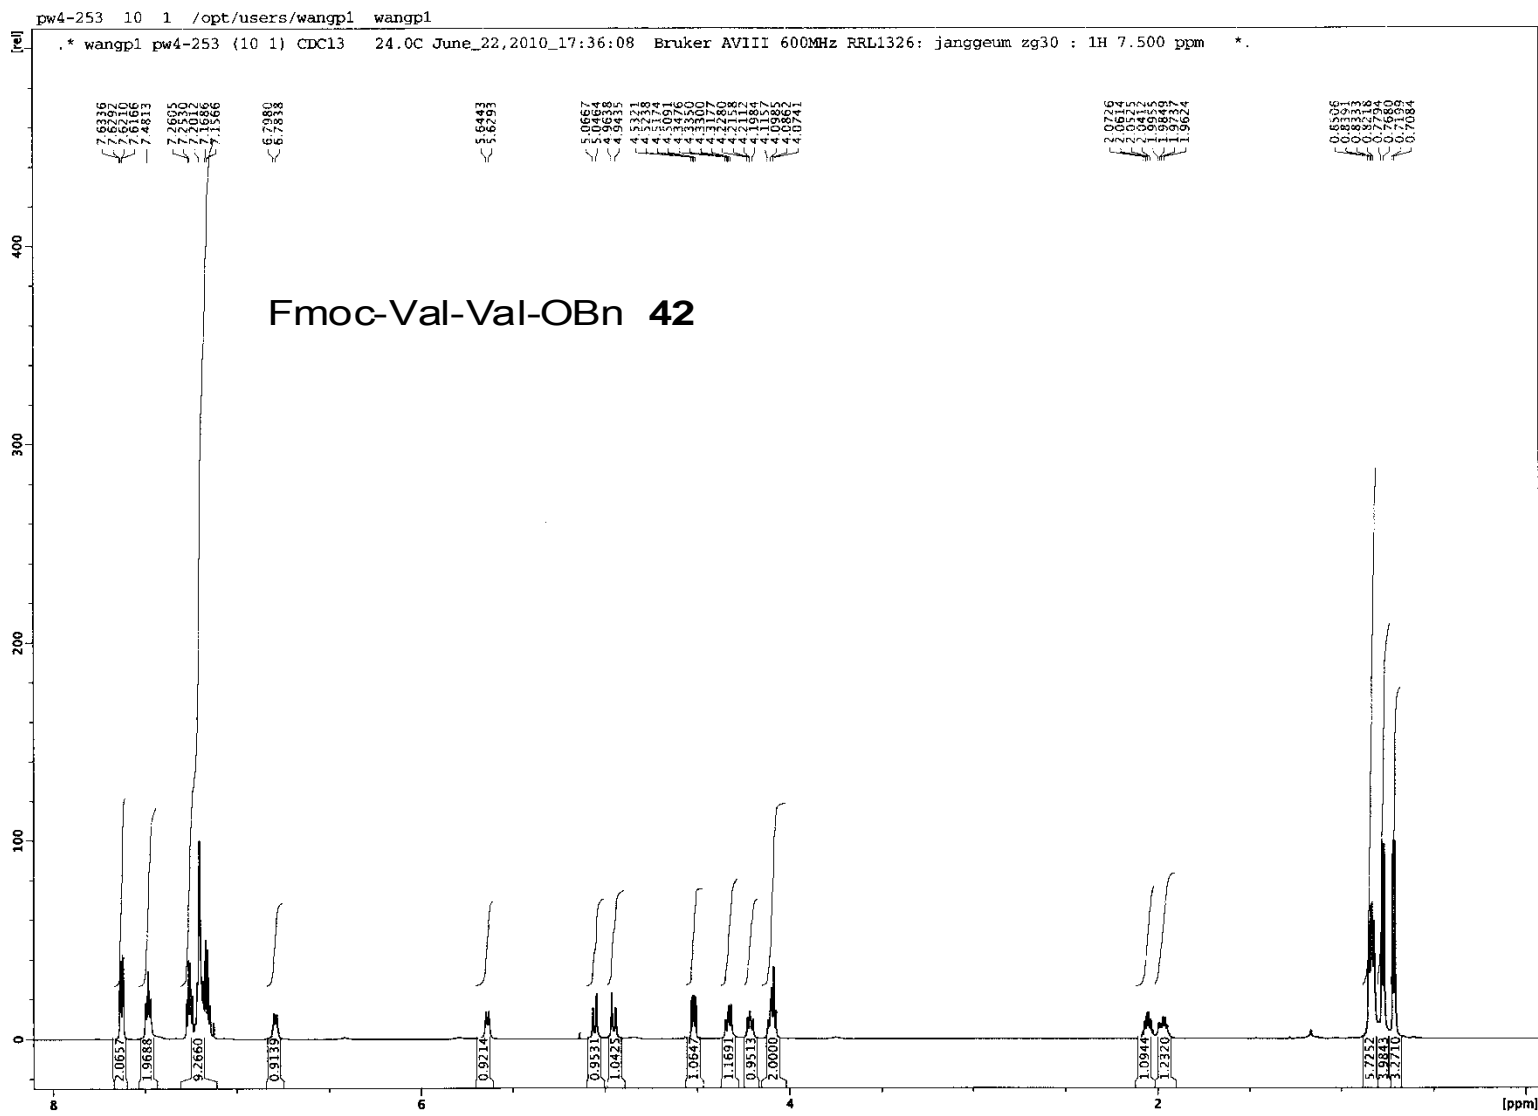

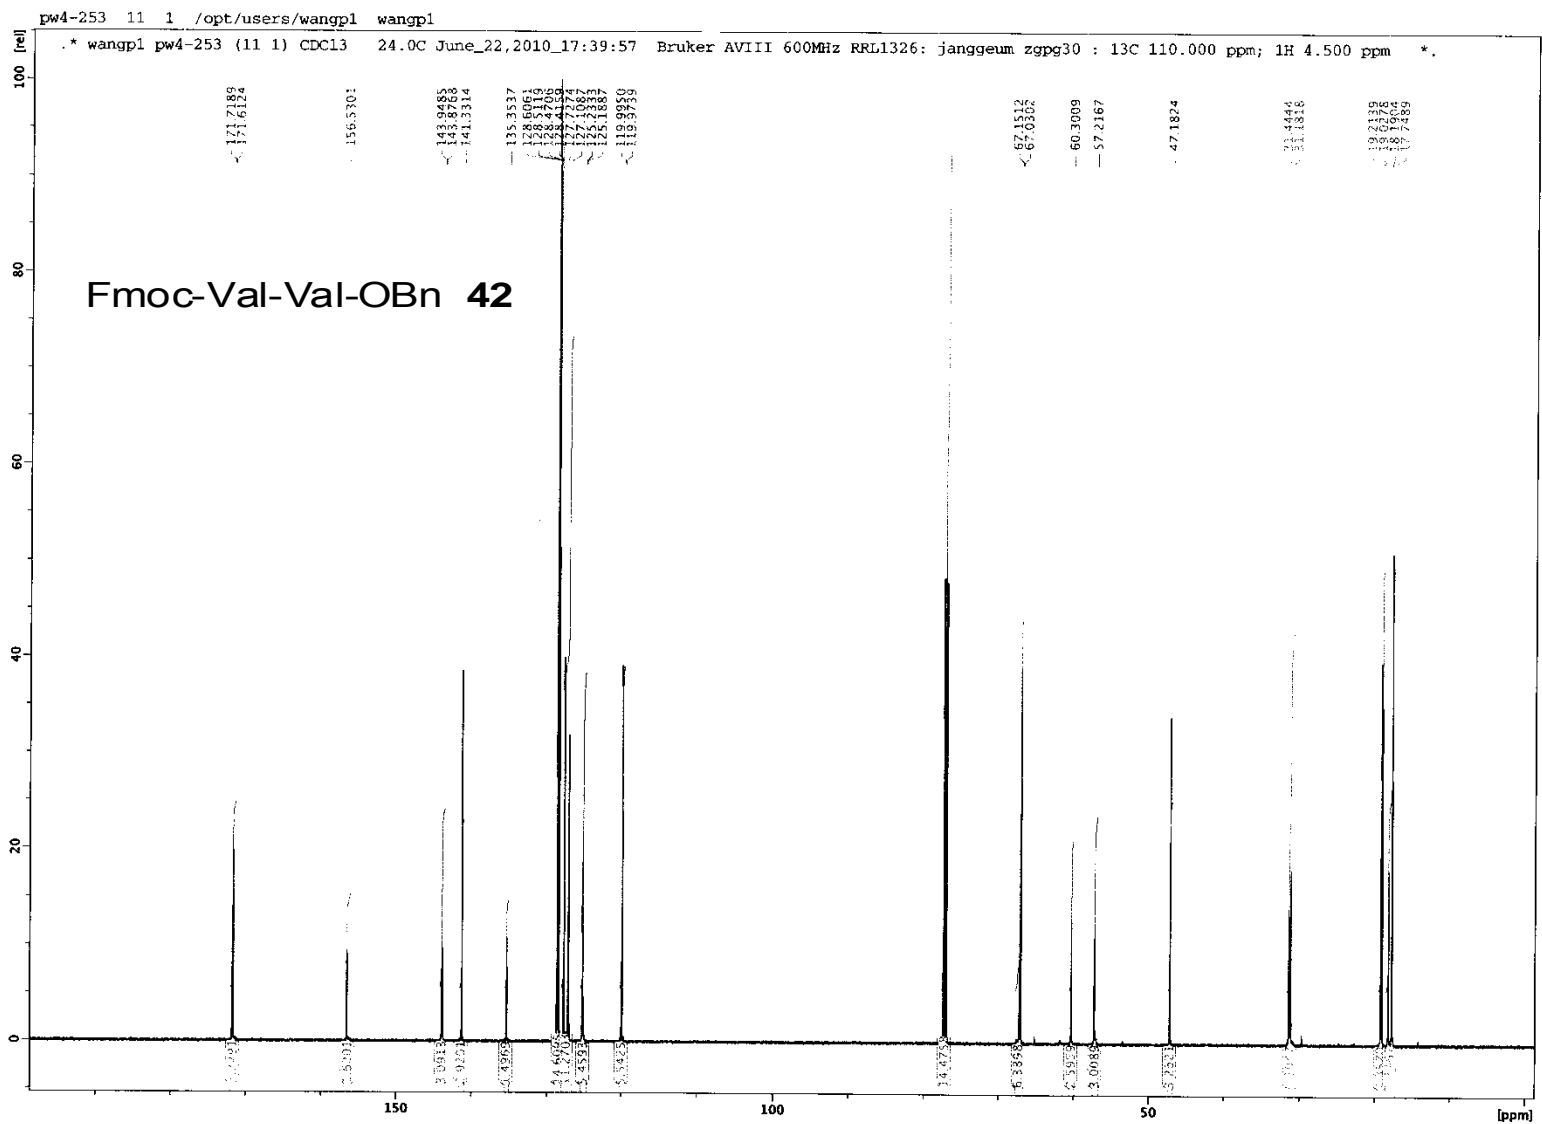



pw4-252a 10 1 /opt/users/wangpl wangpl

\* wangpl pw4-252a (10 1) CDCl3 24.0C June\_23,2010\_11:08:34 Bruker AVIII 600MHz RRL1326: janggeum zg30 : 1H 7.500 ppm \*.

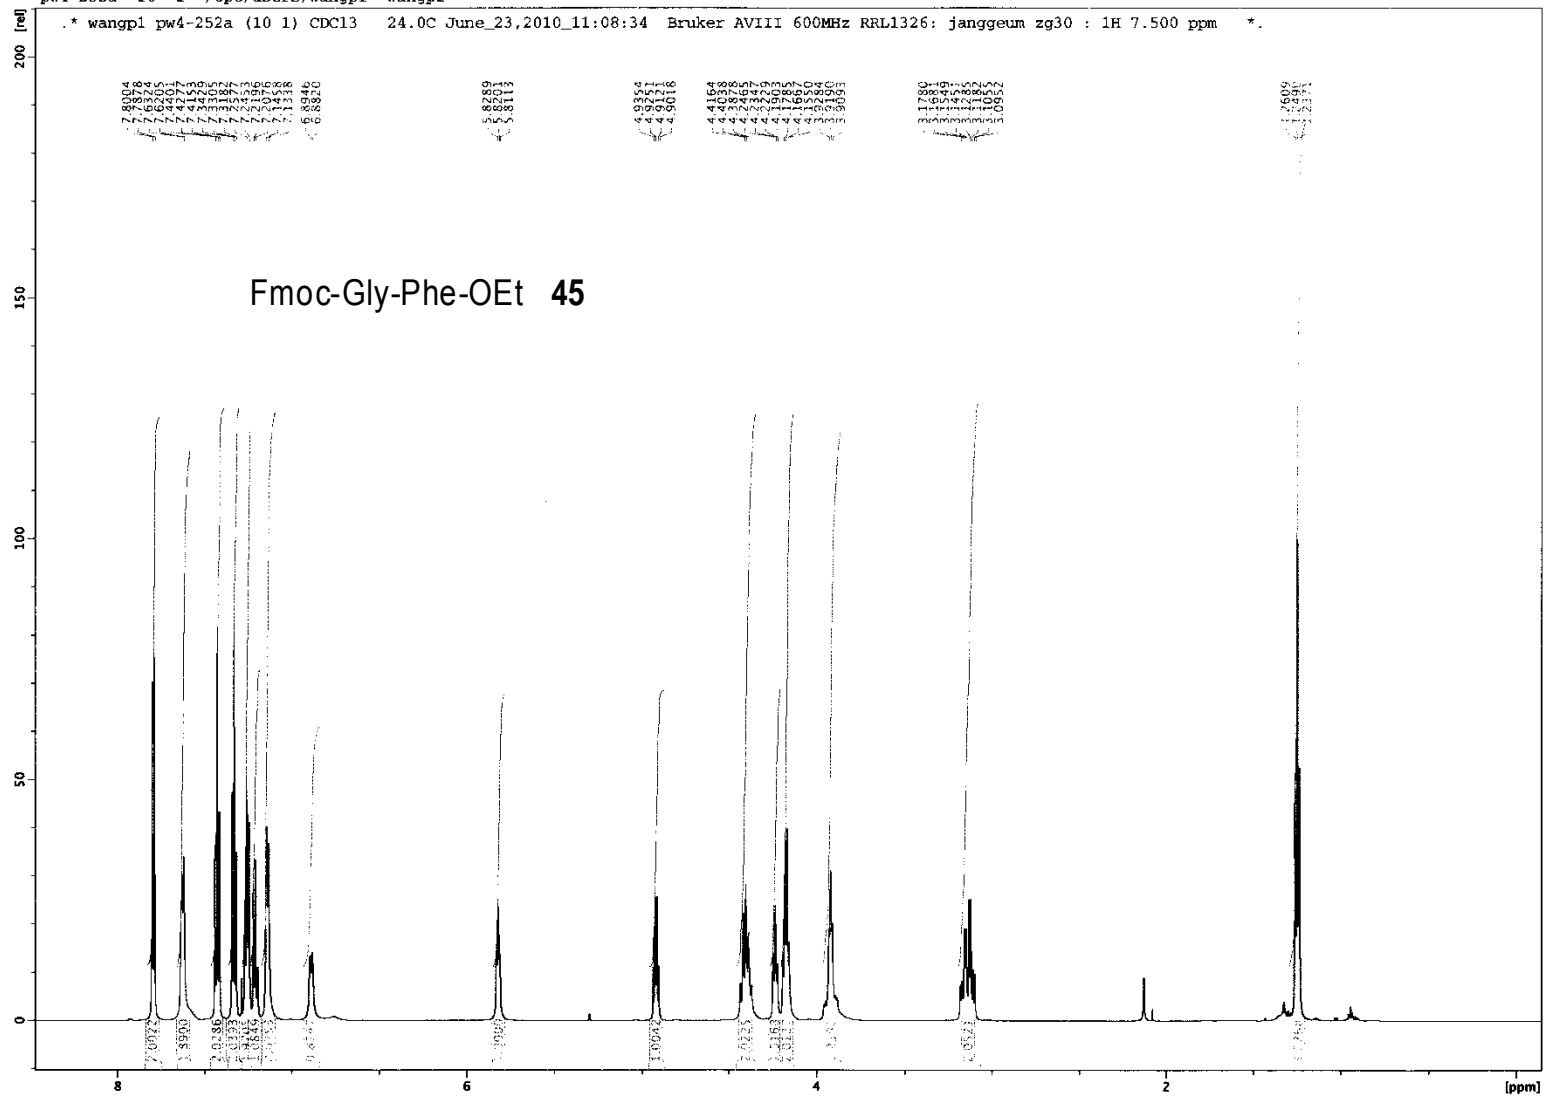

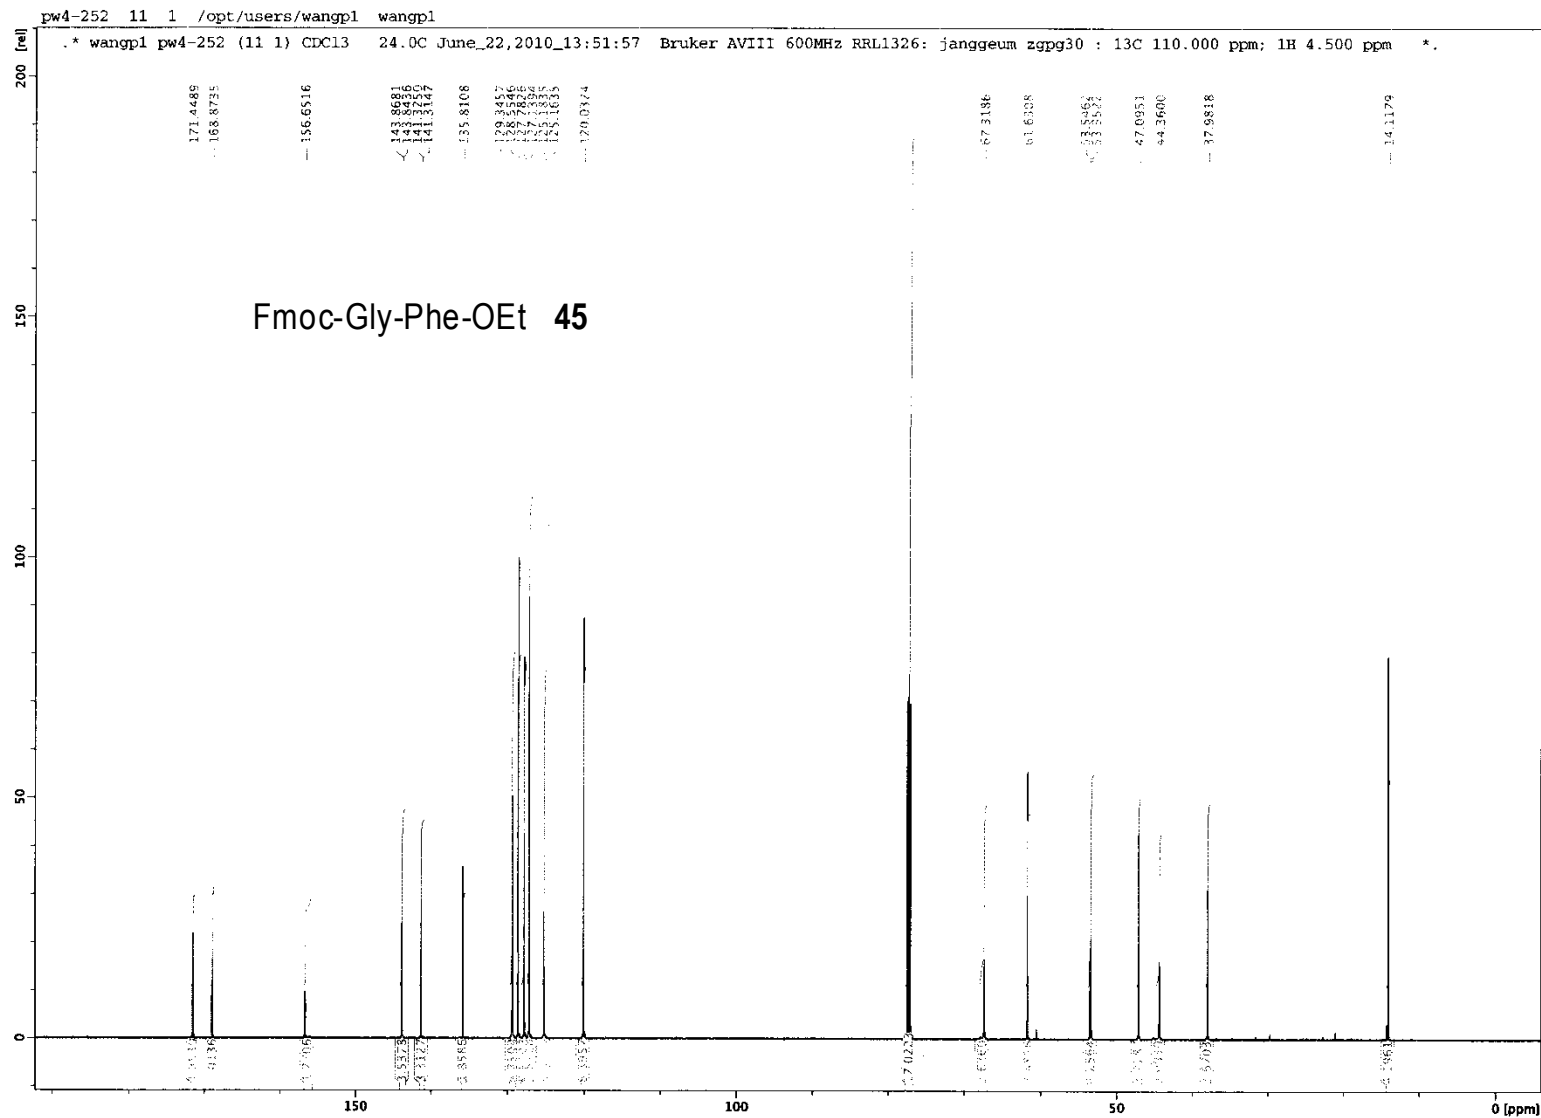

Supplement: NIHMS250720-supplement-1_si_001.pdf [file NIHMS250720-supplement-1_si_001.pdf]
